# Supplementary material for: Cu(ClO4)2·6H2O catalyzed solvent free per-O-acetylation and sequential one-pot conversions of sugars to thioglycosides
Source: Royal Society of Chemistry journal article supplement (doi:10.1039/c5ra03461b), 2015-01-01
Supplement: c5ra03461b1.pdf [file c5ra03461b1.pdf]

**Electronic Supplementary Information for**

**Cu(ClO<sub>4</sub>)<sub>2</sub>·6H<sub>2</sub>O catalyzed solvent free per-*O*-acetylation and sequential one-pot conversions of  
sugars to thioglycosides**

**Debnath Chatterjee,<sup>a</sup> Abhijit Paul,<sup>a</sup> Rajkamal<sup>a</sup> and Somnath Yadav<sup>\*a</sup>**

## Table of contents:

|                                                                                                                                                                             |     |
|-----------------------------------------------------------------------------------------------------------------------------------------------------------------------------|-----|
| <b>Fig. 1</b> <sup>1</sup> H-NMR spectra (400 MHz, CDCl <sub>3</sub> ) of 1,2,3,4,6-penta- <i>O</i> -acetyl- $\alpha$ -D-glucopyranoside ( <b>2a</b> )                      | S4  |
| <b>Fig. 2</b> <sup>13</sup> C-NMR spectra (100 MHz, CDCl <sub>3</sub> ) of 1,2,3,4,6-penta- <i>O</i> -acetyl- $\alpha$ -D-glucopyranoside ( <b>2a</b> )                     | S5  |
| <b>Fig. 3</b> <sup>1</sup> H-NMR spectra (400 MHz, CDCl <sub>3</sub> ) of 1,2,3,4,6-penta- <i>O</i> -acetyl- $\alpha$ -D-mannopyranoside ( <b>2b</b> )                      | S6  |
| <b>Fig. 4</b> <sup>13</sup> C-NMR spectra (100 MHz, CDCl <sub>3</sub> ) of 1,2,3,4,6-penta- <i>O</i> -acetyl- $\alpha$ -D-mannopyranoside ( <b>2b</b> )                     | S7  |
| <b>Fig. 5</b> <sup>1</sup> H-NMR spectra (400 MHz, CDCl <sub>3</sub> ) of 1,2,3,4,6-penta- <i>O</i> -acetyl-D-galactopyranoside ( <b>2c</b> )                               | S8  |
| <b>Fig. 6</b> <sup>13</sup> C-NMR spectra (100 MHz, CDCl <sub>3</sub> ) of 1,2,3,4,6-penta- <i>O</i> -acetyl-D-galactopyranoside ( <b>2c</b> )                              | S9  |
| <b>Fig. 7</b> <sup>1</sup> H-NMR spectra (400 MHz, CDCl <sub>3</sub> ) of 1,3,4,6-tetra- <i>O</i> -acetyl-2- <i>N</i> -acetyl- $\alpha$ -D-glucosamine ( <b>2d</b> )        | S10 |
| <b>Fig. 8</b> <sup>13</sup> C-NMR spectra (100 MHz, CDCl <sub>3</sub> ) of 1,3,4,6-tetra- <i>O</i> -acetyl-2- <i>N</i> -acetyl- $\alpha$ -D-glucosamine ( <b>2d</b> )       | S11 |
| <b>Fig. 9</b> <sup>1</sup> H-NMR spectra (400 MHz, CDCl <sub>3</sub> ) of 1,3,4,6-tetra- <i>O</i> -acetyl-2-phthalimido-2-deoxy- $\beta$ -D-glucopyranoside ( <b>2e</b> )   | S12 |
| <b>Fig. 10</b> <sup>13</sup> C-NMR spectra (100 MHz, CDCl <sub>3</sub> ) of 1,3,4,6-tetra- <i>O</i> -acetyl-2-phthalimido-2-deoxy- $\beta$ -D-glucopyranoside ( <b>2e</b> ) | S13 |
| <b>Fig. 11</b> <sup>1</sup> H-NMR spectra (400 MHz, CDCl <sub>3</sub> ) of 1,3,4,6-tetra- <i>O</i> -acetyl-2-azido-2-deoxy-D-glucopyranoside ( <b>2f</b> )                  | S14 |
| <b>Fig. 12</b> <sup>13</sup> C-NMR spectra (100 MHz, CDCl <sub>3</sub> ) of 1,3,4,6-tetra- <i>O</i> -acetyl-2-azido-2-deoxy-D-glucopyranoside ( <b>2f</b> )                 | S15 |
| <b>Fig. 13</b> <sup>1</sup> H-NMR spectra (400 MHz, CDCl <sub>3</sub> ) of 1,2,3,4-Tetra- <i>O</i> -acetyl-D-xylopyranoside ( <b>2g</b> )                                   | S16 |
| <b>Fig. 14</b> <sup>13</sup> C-NMR spectra (100 MHz, CDCl <sub>3</sub> ) of 1,2,3,4-Tetra- <i>O</i> -acetyl-D-xylopyranoside ( <b>2g</b> )                                  | S17 |
| <b>Fig. 15</b> <sup>1</sup> H-NMR spectra (400 MHz, CDCl <sub>3</sub> ) of 1- <i>O</i> -Methyl-2,3,4,6-tetra- <i>O</i> -acetyl- $\alpha$ -D-glucopyranoside ( <b>2h</b> )   | S18 |
| <b>Fig. 16</b> <sup>13</sup> C-NMR spectra (100 MHz, CDCl <sub>3</sub> ) of 1- <i>O</i> -Methyl-2,3,4,6-tetra- <i>O</i> -acetyl- $\alpha$ -D-glucopyranoside ( <b>2h</b> )  | S19 |
| <b>Fig.17</b> <sup>1</sup> H-NMR spectra (400 MHz, CDCl <sub>3</sub> ) of Hexa- <i>O</i> -acetyl- <i>myo</i> -inositol ( <b>2i</b> )                                        | S20 |
| <b>Fig. 18</b> <sup>13</sup> C-NMR spectra (100 MHz, CDCl <sub>3</sub> ) of Hexa- <i>O</i> -acetyl- <i>myo</i> -inositol ( <b>2i</b> )                                      | S21 |
| <b>Fig. 19</b> <sup>1</sup> H-NMR spectra (400 MHz, CDCl <sub>3</sub> ) of Hexa- <i>O</i> -acetyl-D-mannitol ( <b>2j</b> )                                                  | S22 |
| <b>Fig. 20</b> <sup>13</sup> C-NMR spectra (100 MHz, CDCl <sub>3</sub> ) of Hexa- <i>O</i> -acetyl-D-mannitol ( <b>2j</b> )                                                 | S23 |

|                                                                                                                                                                                        |     |
|----------------------------------------------------------------------------------------------------------------------------------------------------------------------------------------|-----|
| <b>Fig. 21</b> <sup>1</sup> H-NMR spectra (400 MHz, CDCl <sub>3</sub> ) of D-maltose octa- <i>O</i> -acetate ( <b>2k</b> )                                                             | S24 |
| <b>Fig. 22</b> <sup>13</sup> C-NMR spectra (100 MHz, CDCl <sub>3</sub> ) of D-maltose octa- <i>O</i> -acetate ( <b>2k</b> )                                                            | S25 |
| <b>Fig. 23</b> <sup>1</sup> H-NMR spectra (400 MHz, CDCl <sub>3</sub> ) of Sucrose octa- <i>O</i> -acetate ( <b>2l</b> )                                                               | S26 |
| <b>Fig. 24</b> <sup>13</sup> C-NMR spectra (100 MHz, CDCl <sub>3</sub> ) of Sucrose octa- <i>O</i> -acetate ( <b>2l</b> )                                                              | S27 |
| <b>Fig. 25</b> <sup>1</sup> H-NMR spectra (400 MHz, CDCl <sub>3</sub> ) of Per- <i>O</i> -acetylated β-cyclodextrin ( <b>2m</b> )                                                      | S28 |
| <b>Fig. 26</b> <sup>13</sup> C-NMR spectra (100 MHz, CDCl <sub>3</sub> ) of Per- <i>O</i> -acetylated β-cyclodextrin ( <b>2m</b> )                                                     | S29 |
| <b>Fig. 27</b> <sup>1</sup> H-NMR spectra (400 MHz, CDCl <sub>3</sub> ) of <i>p</i> -Tolyl 2,3,4,6- <i>O</i> -acetyl-1-thio-β-D-glucopyranoside ( <b>3a</b> )                          | S30 |
| <b>Fig. 28</b> <sup>13</sup> C-NMR spectra (100 MHz, CDCl <sub>3</sub> ) of <i>p</i> -Tolyl 2,3,4,6- <i>O</i> -acetyl-1-thio-β-D-glucopyranoside ( <b>3a</b> )                         | S31 |
| <b>Fig. 29</b> <sup>1</sup> H-NMR spectra (400 MHz, CDCl <sub>3</sub> ) of <i>p</i> -Tolyl 2,3,4,6-tetra- <i>O</i> -acetyl-1-thio-α-D-mannopyranoside ( <b>3b</b> )                    | S32 |
| <b>Fig. 30</b> <sup>13</sup> C-NMR spectra (100 MHz, CDCl <sub>3</sub> ) of <i>p</i> -Tolyl 2,3,4,6-tetra- <i>O</i> -acetyl-1-thio-α-D-mannopyranoside ( <b>3b</b> )                   | S33 |
| <b>Fig. 31</b> <sup>1</sup> H-NMR spectra (400 MHz, CDCl <sub>3</sub> ) of <i>p</i> -Tolyl 2,3,4,6-tetra- <i>O</i> -acetyl-1-thio-β-D-galactopyranoside ( <b>3c</b> )                  | S34 |
| <b>Fig. 32</b> <sup>13</sup> C-NMR spectra (100 MHz, CDCl <sub>3</sub> ) of <i>p</i> -Tolyl 2,3,4,6-tetra- <i>O</i> -acetyl-1-thio-β-D-galactopyranoside ( <b>3c</b> )                 | S35 |
| <b>Fig. 33</b> <sup>1</sup> H-NMR spectra (400 MHz, CDCl <sub>3</sub> ) of <i>p</i> -Tolyl 2-acetamido-3,4,6-tri- <i>O</i> -acetyl-2-deoxy-1-thio-β-D-glucopyranoside ( <b>3d</b> )    | S36 |
| <b>Fig. 34</b> <sup>13</sup> C-NMR spectra (100 MHz, CDCl <sub>3</sub> ) of <i>p</i> -Tolyl 2-acetamido-3,4,6-tri- <i>O</i> -acetyl-2-deoxy-1-thio-β-D-glucopyranoside ( <b>3d</b> )   | S37 |
| <b>Fig. 35</b> <sup>1</sup> H-NMR spectra (400 MHz, CDCl <sub>3</sub> ) of <i>p</i> -Tolyl 3,4,6-tri- <i>O</i> -acetyl-2-phthalimido-2-deoxy-1-thio-β-D-glucopyranoside ( <b>3e</b> )  | S38 |
| <b>Fig. 36</b> <sup>13</sup> C-NMR spectra (100 MHz, CDCl <sub>3</sub> ) of <i>p</i> -Tolyl 3,4,6-tri- <i>O</i> -acetyl-2-phthalimido-2-deoxy-1-thio-β-D-glucopyranoside ( <b>3e</b> ) | S39 |
| <b>Fig. 37</b> <sup>1</sup> H-NMR spectra (500 MHz, CDCl <sub>3</sub> ) of <i>p</i> -Tolyl 3,4,6-Tri- <i>O</i> -acetyl-2-azido-2-deoxy-1-thio-D-glucopyranoside ( <b>3f</b> )          | S40 |
| <b>Fig. 38</b> <sup>13</sup> C-NMR spectra (100 MHz, CDCl <sub>3</sub> ) of <i>p</i> -Tolyl 3,4,6-Tri- <i>O</i> -acetyl-2-azido-2-deoxy-1-thio-D-glucopyranoside ( <b>3f</b> )         | S41 |

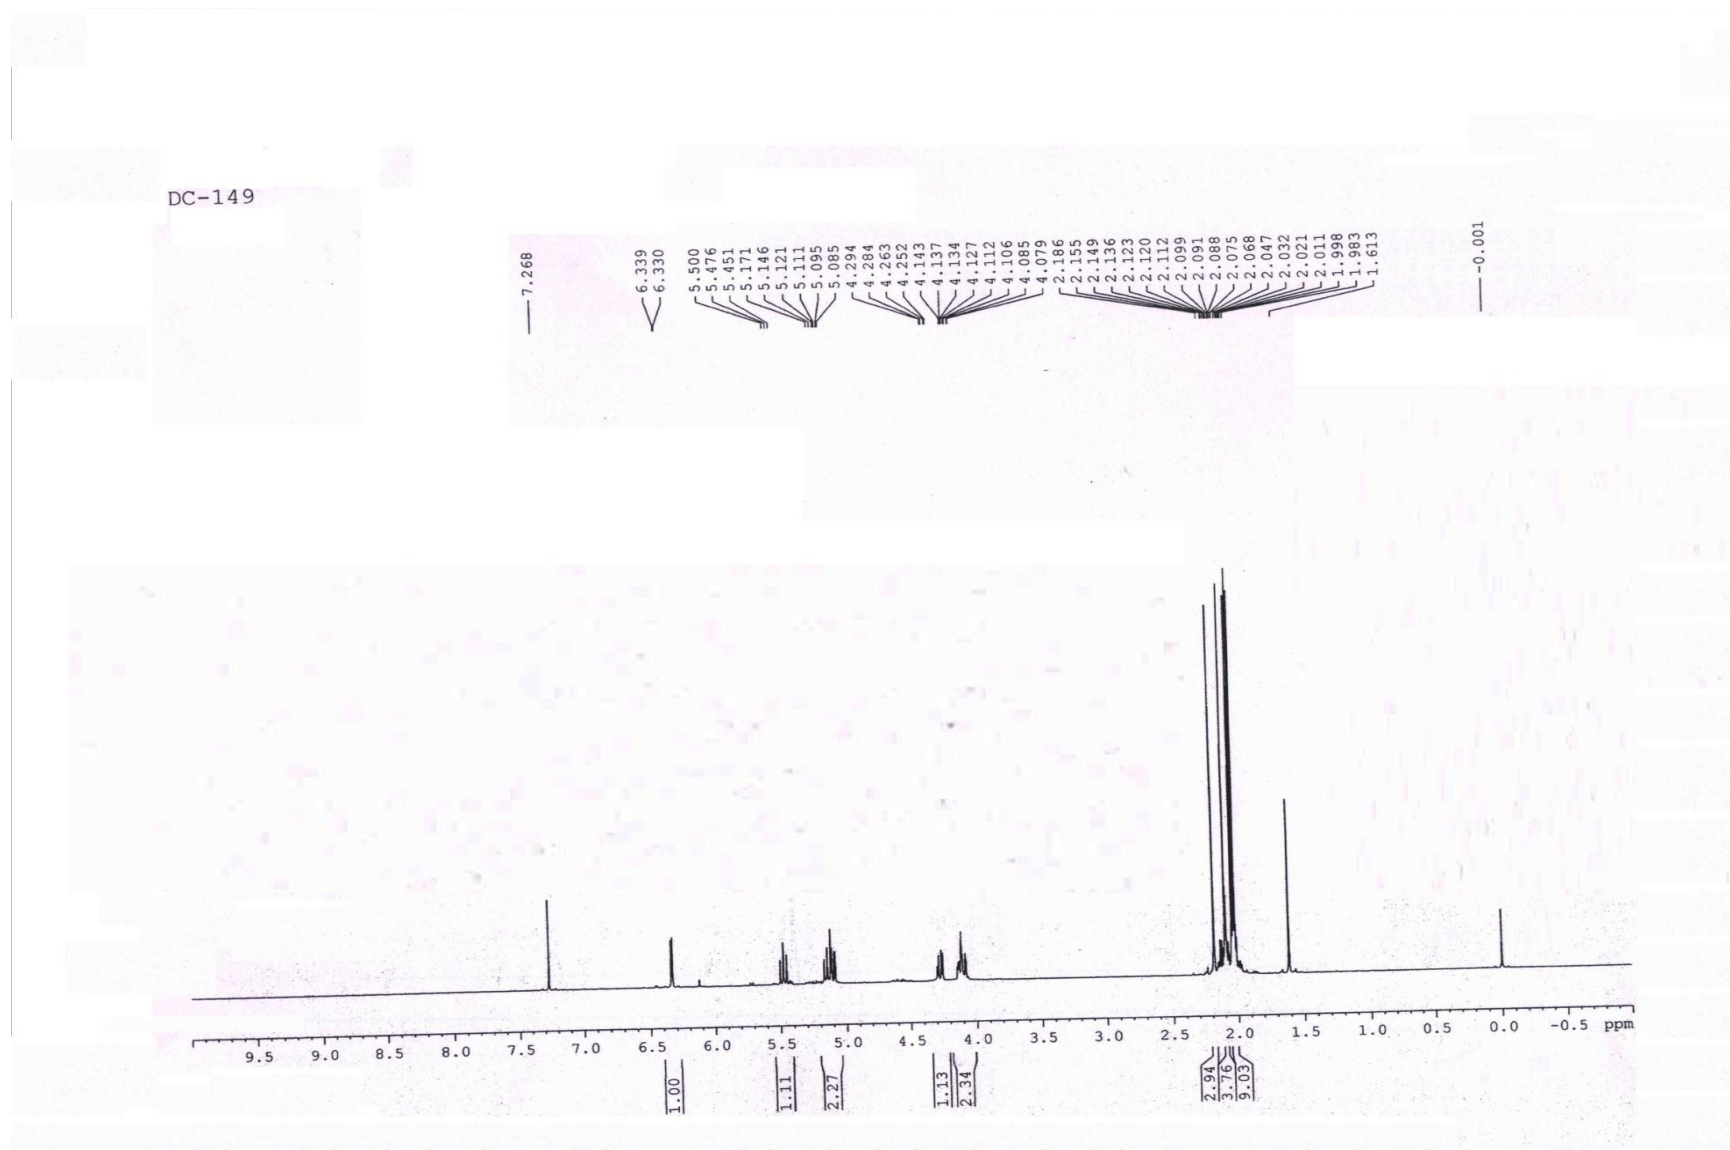

**Fig. 1**  $^1\text{H-NMR}$  spectra (400 MHz,  $\text{CDCl}_3$ ) of 1,2,3,4,6-penta-*O*-acetyl- $\alpha$ -D-glucopyranoside (**2a**)

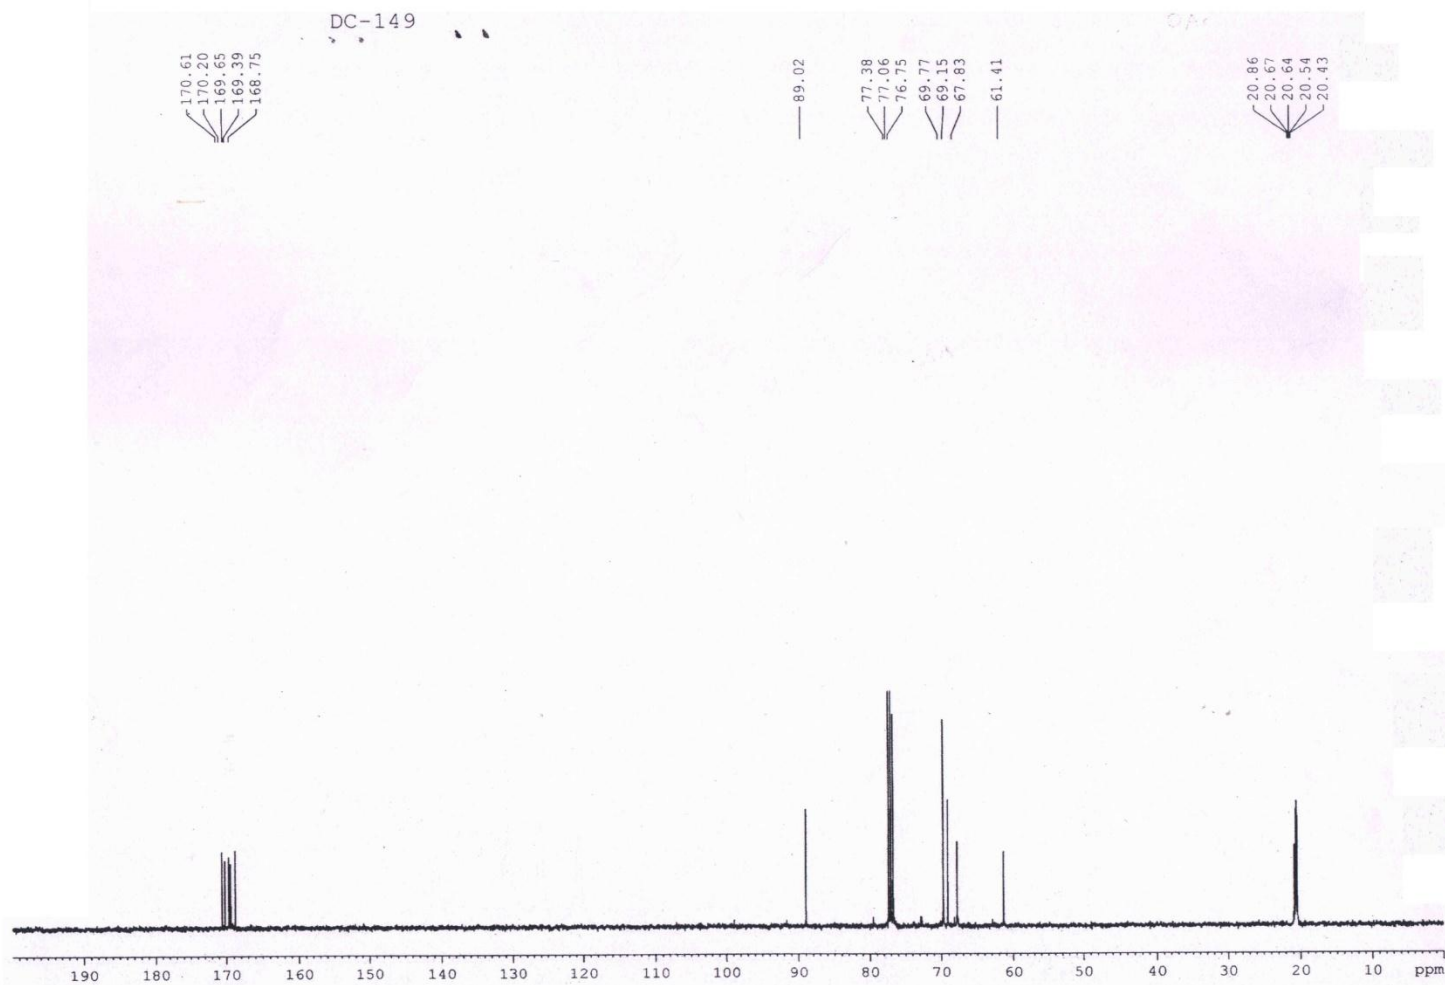

**Fig. 2** <sup>13</sup>C-NMR spectra (100 MHz, CDCl<sub>3</sub>) of 1,2,3,4,6-penta-*O*-acetyl- $\alpha$ -D-glucopyranoside (**2a**)

DC - 163 (D)

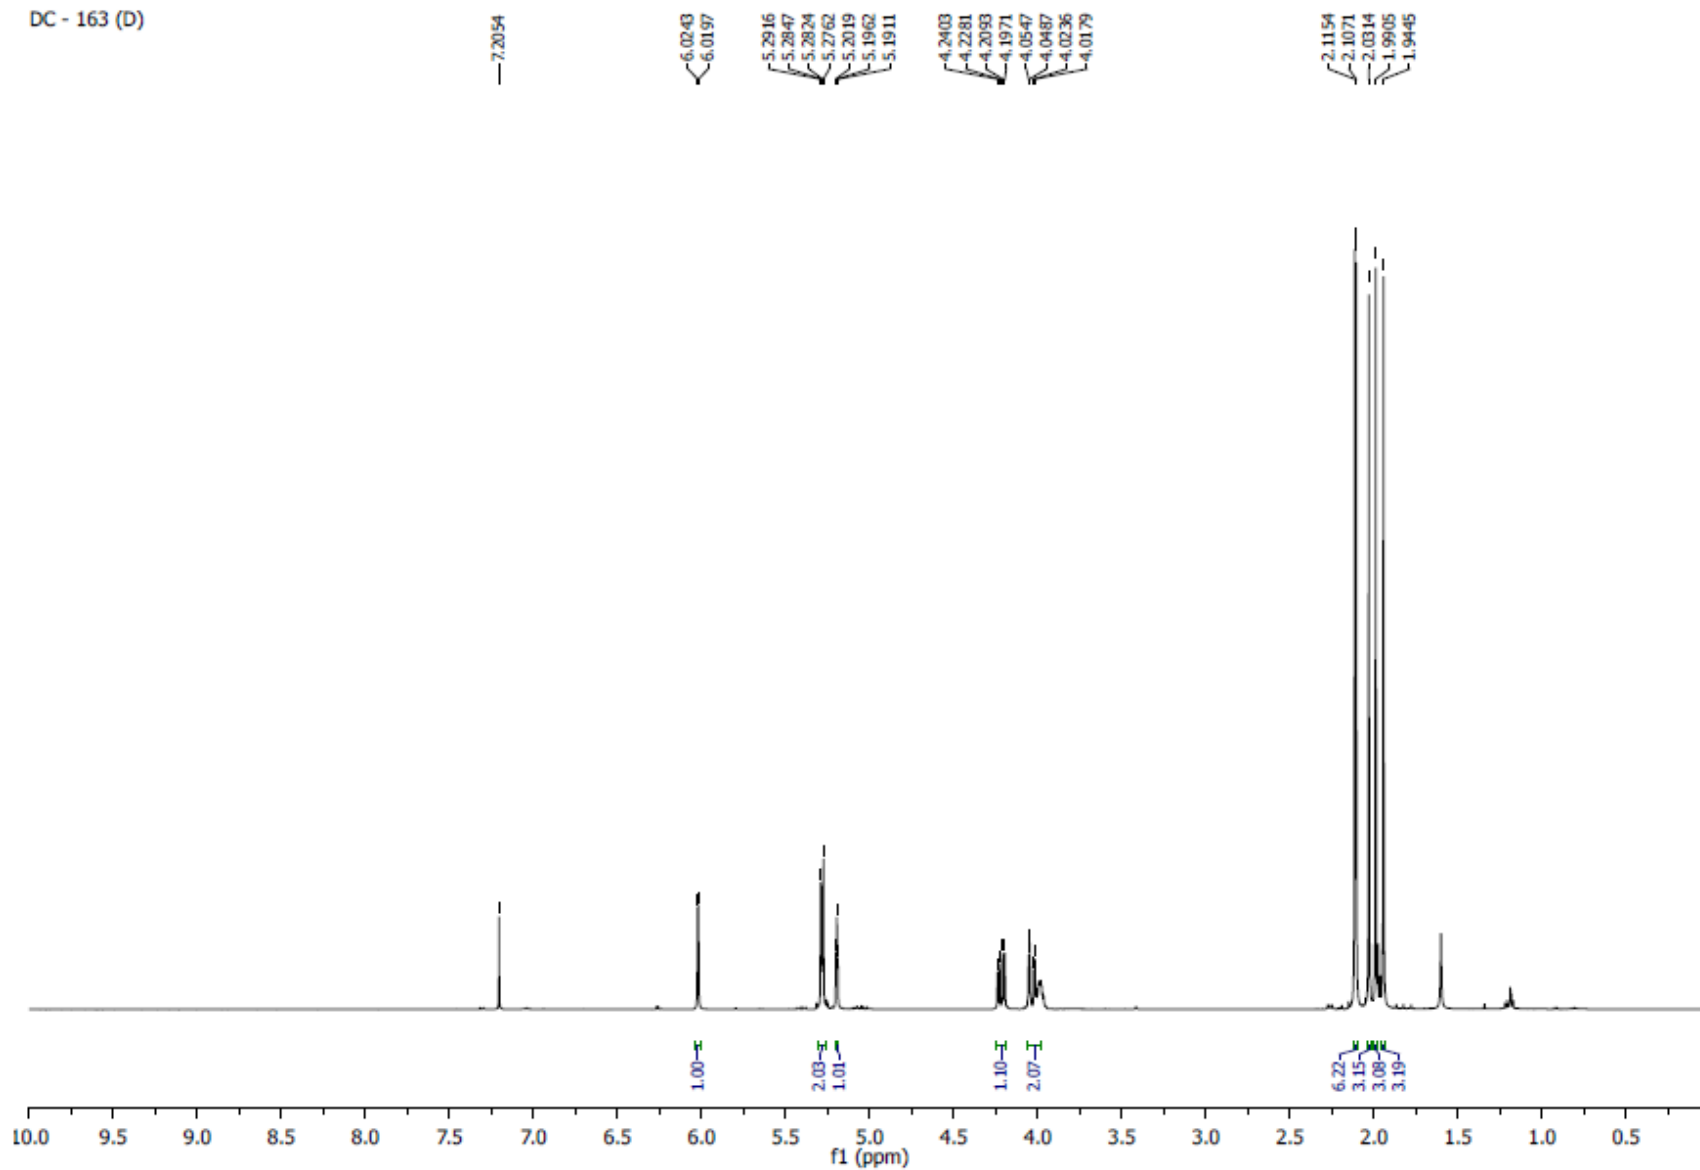

**Fig. 3**  $^1\text{H-NMR}$  spectra (400 MHz,  $\text{CDCl}_3$ ) of 1,2,3,4,6-penta-*O*-acetyl- $\alpha$ -D-mannopyranoside (**2b**)

DC - 163 (D)

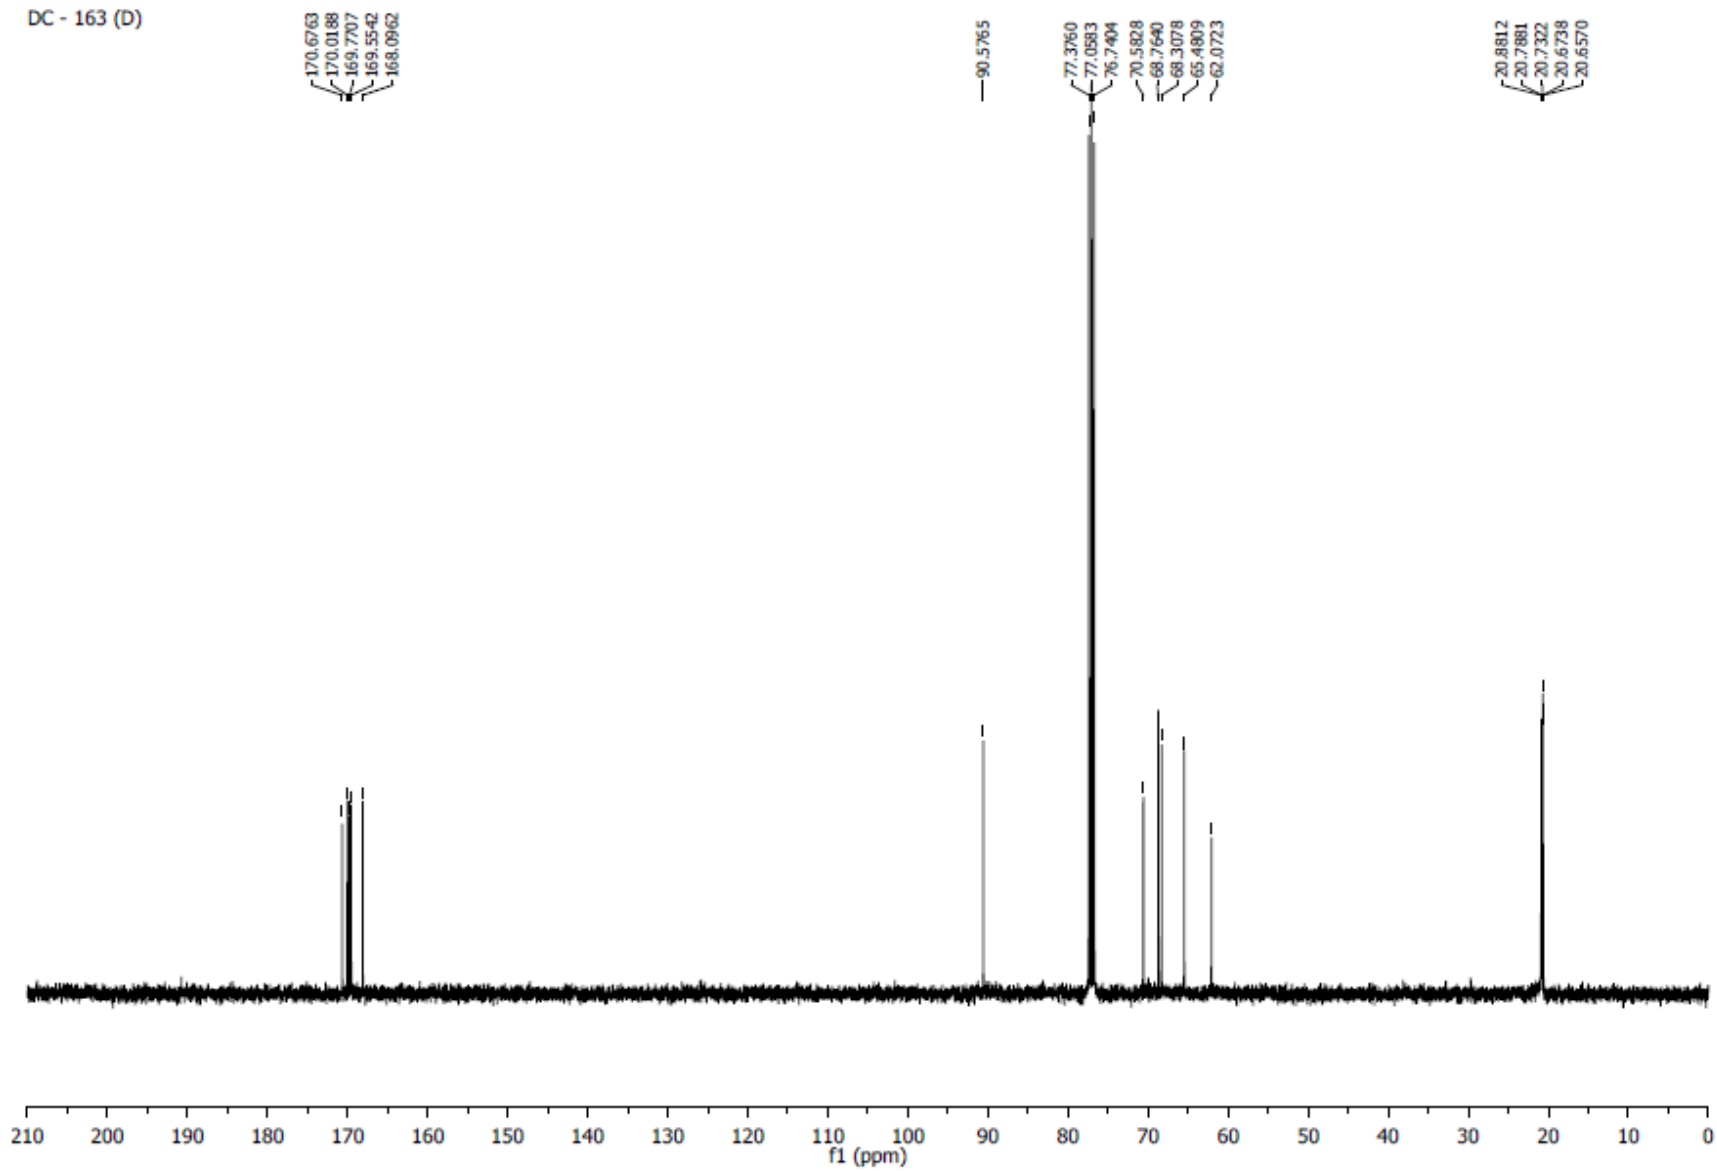



**Fig. 4**  $^{13}\text{C}$ -NMR spectra (100 MHz,  $\text{CDCl}_3$ ) of 1,2,3,4,6-penta-*O*-acetyl- $\alpha$ -D-mannopyranoside (**2b**)

DC - 144

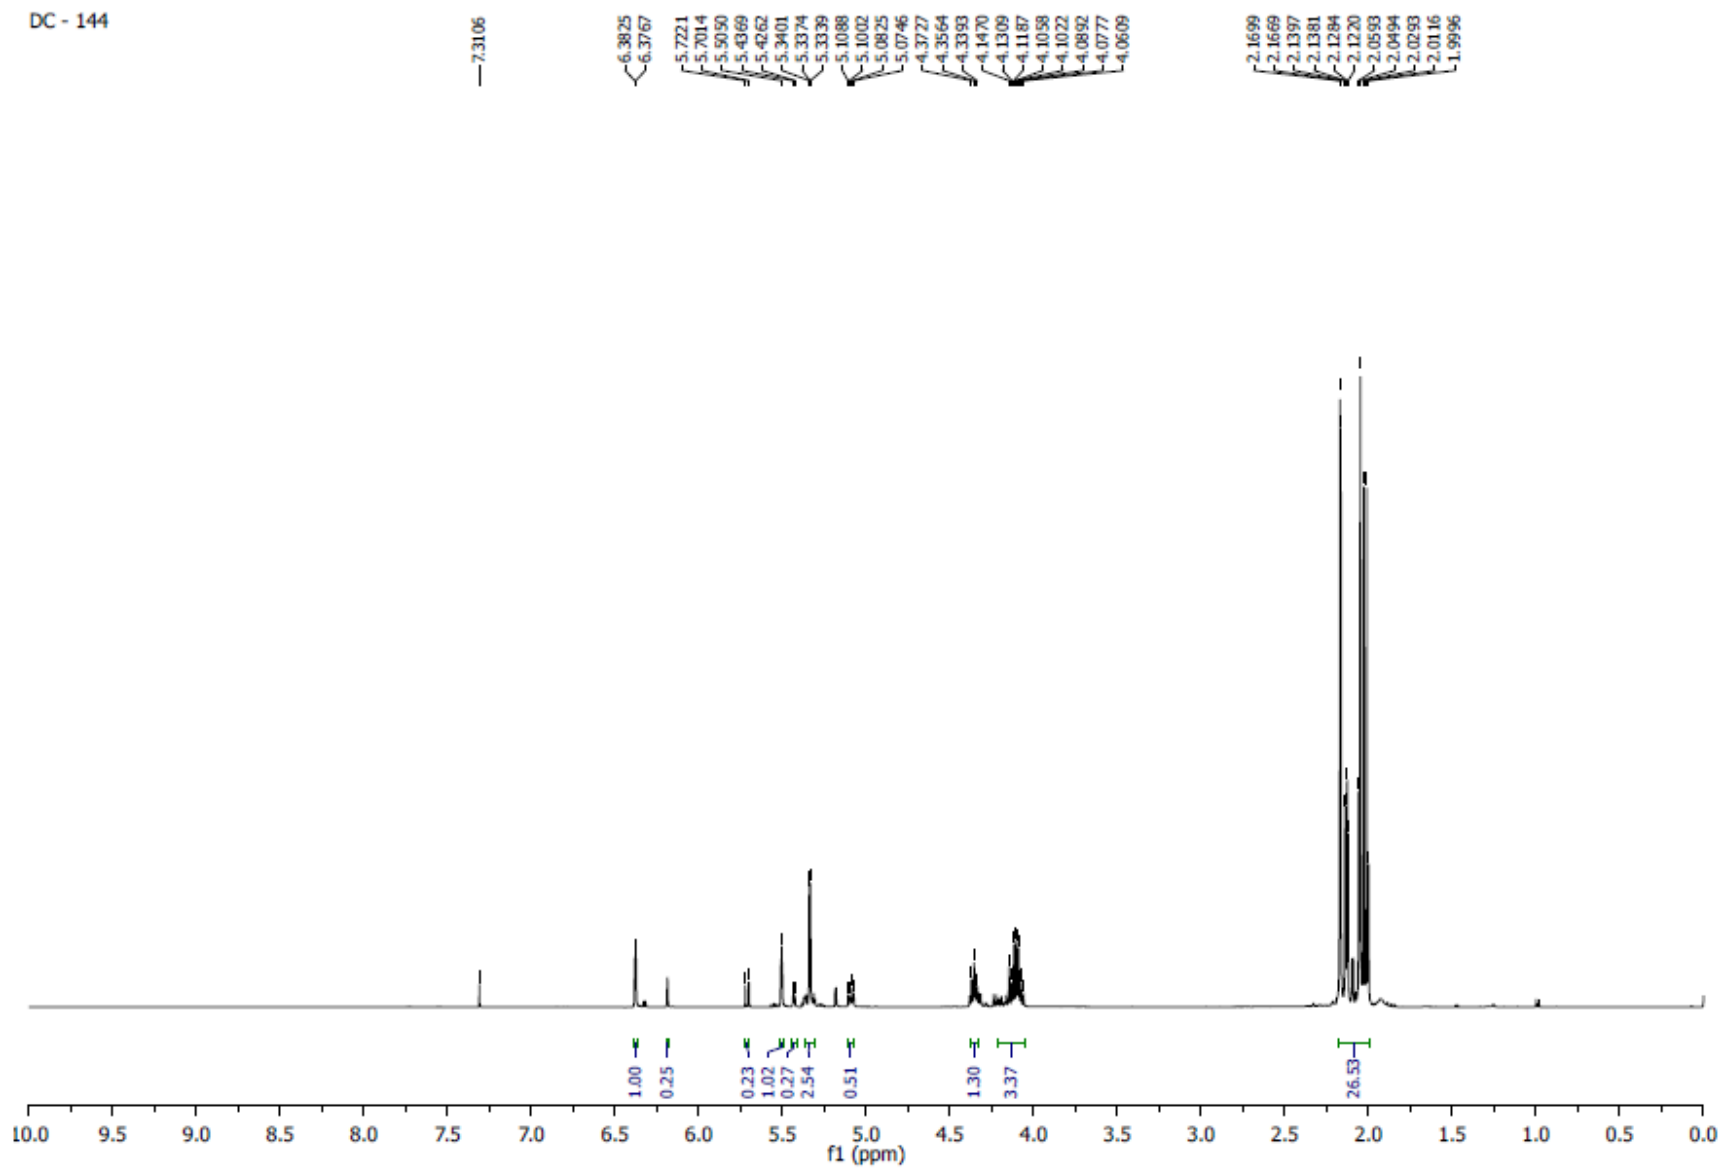

Fig. 5 <sup>1</sup>H-NMR spectra (400 MHz, CDCl<sub>3</sub>) of 1,2,3,4,6-penta-*O*-acetyl-D-galactopyranoside (**2c**)

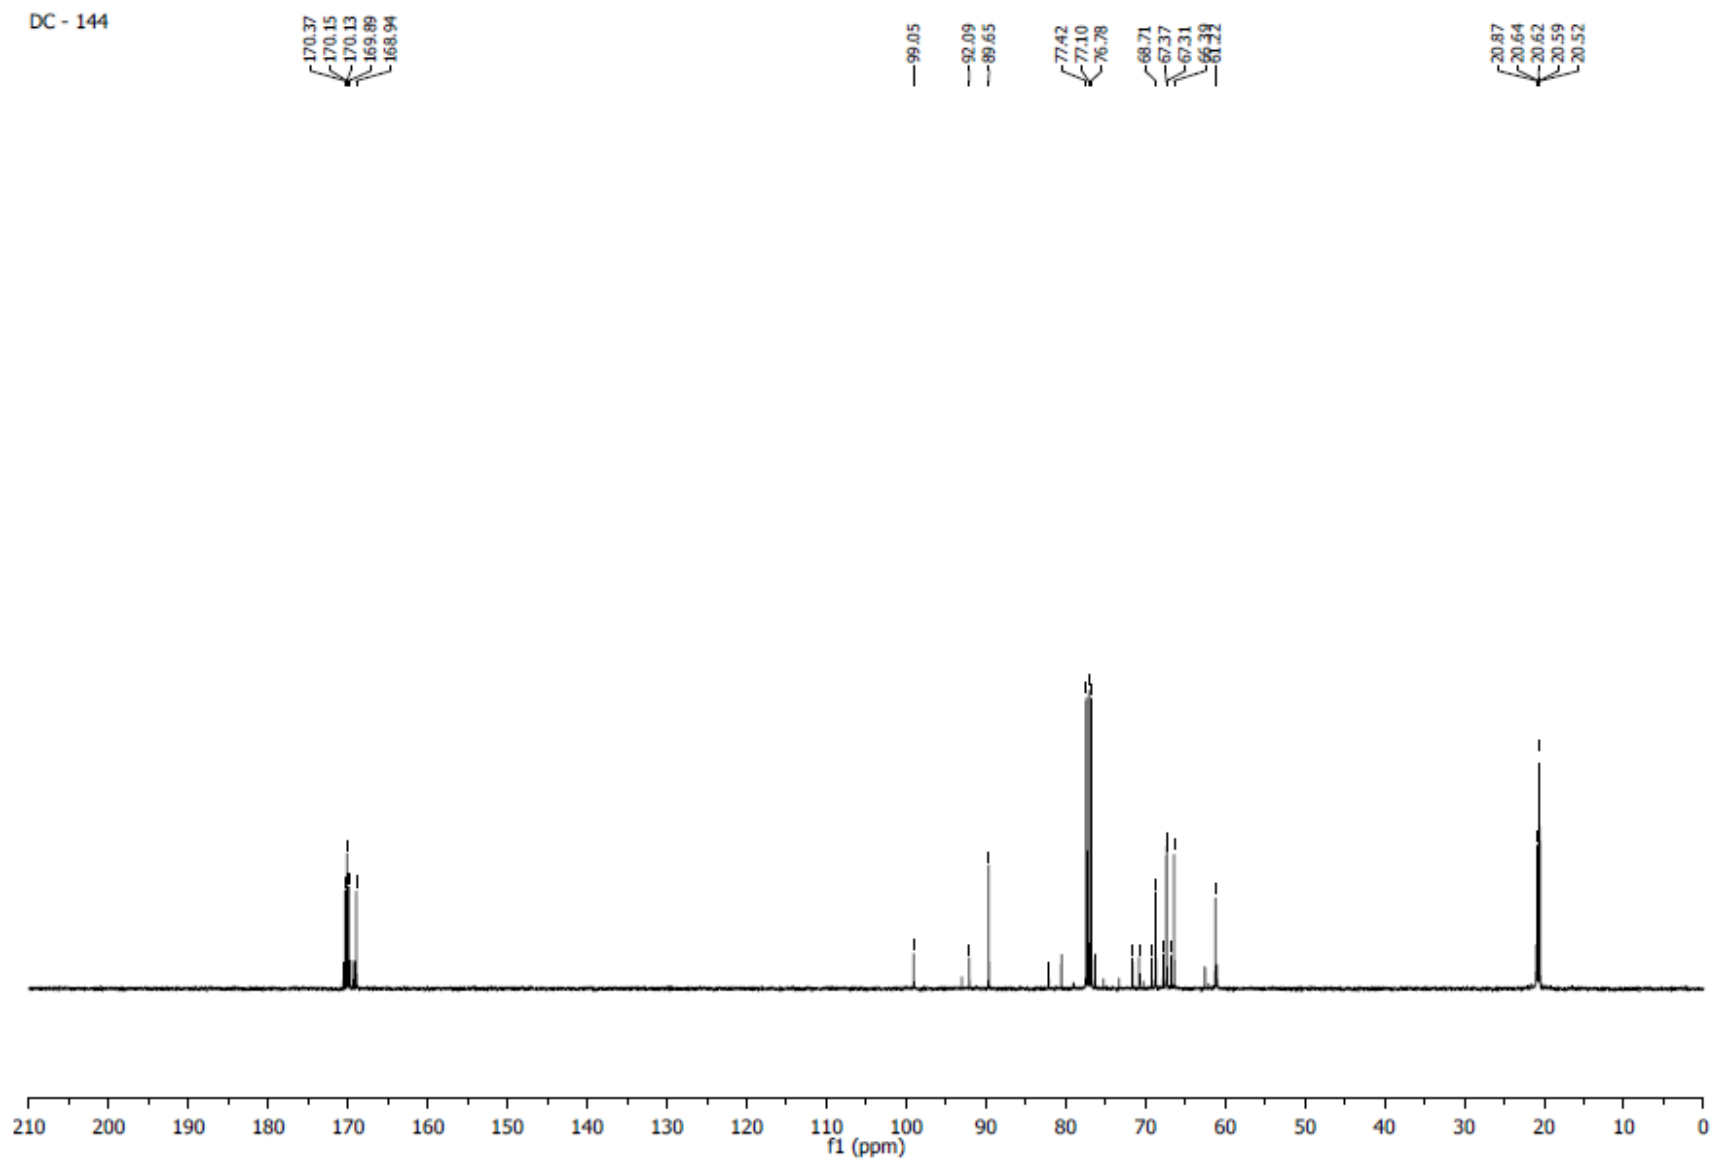

**Fig. 6**  $^{13}\text{C}$ -NMR spectra (100 MHz,  $\text{CDCl}_3$ ) of 1,2,3,4,6-penta-*O*-acetyl-*D*-galactopyranoside (**2c**)

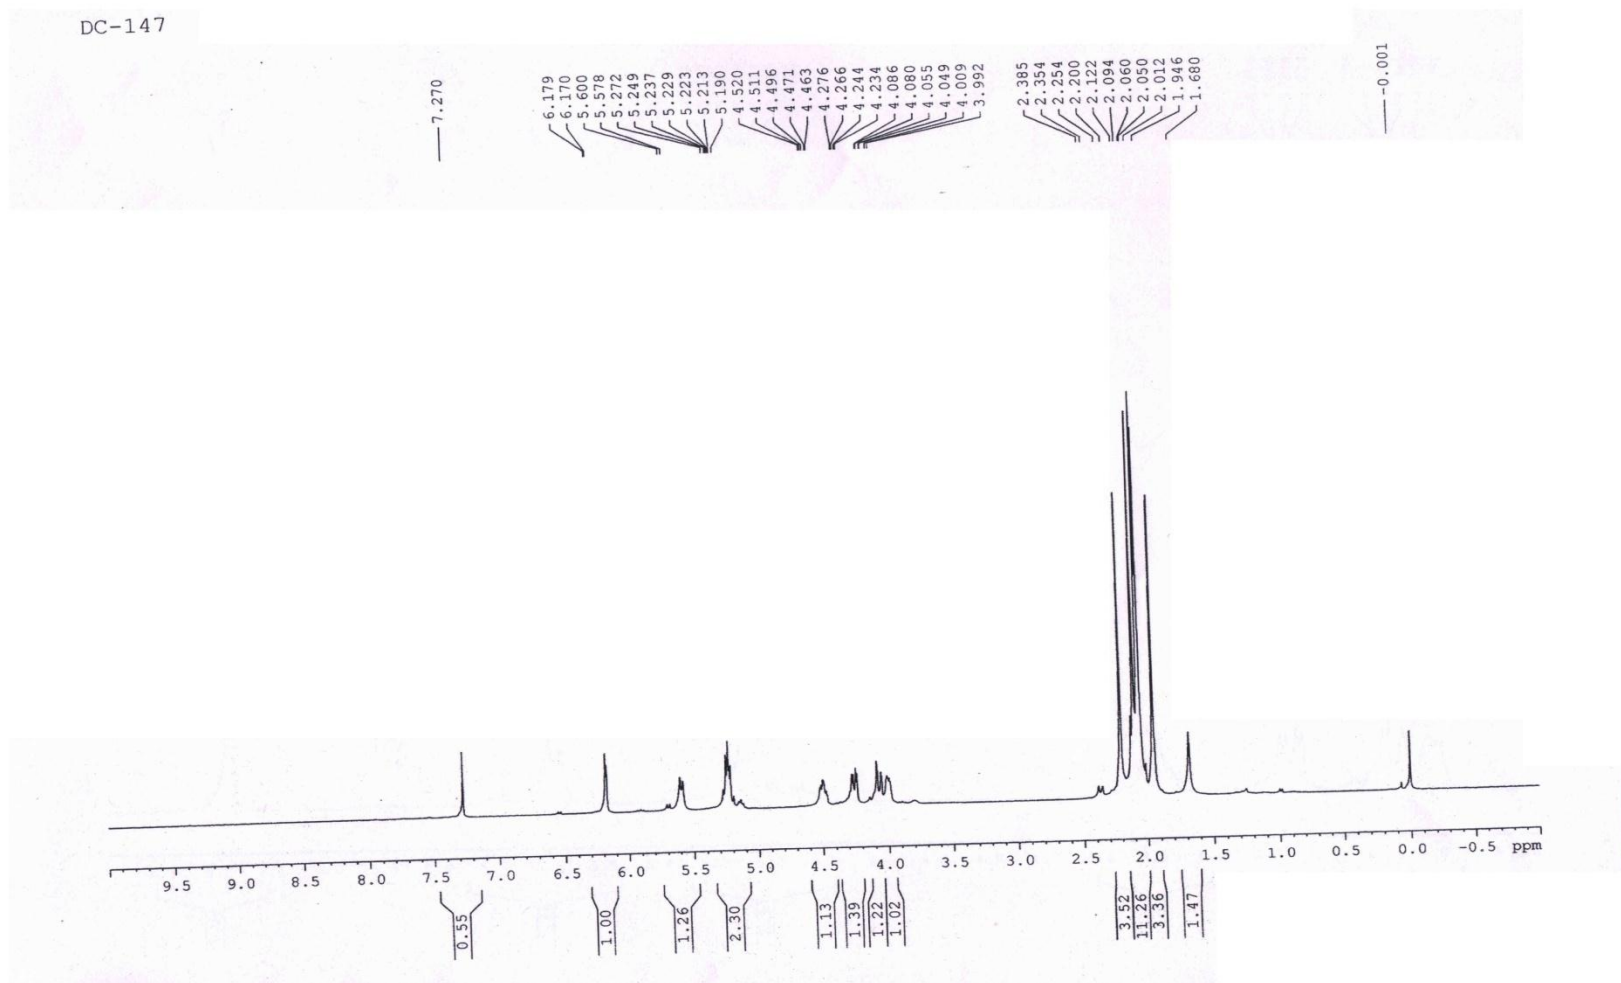

**Fig. 7**  $^1\text{H-NMR}$  spectra (400 MHz,  $\text{CDCl}_3$ ) of 1,3,4,6-tetra-*O*-acetyl-2-*N*-acetyl- $\alpha$ -D-glucosamine (**2d**)

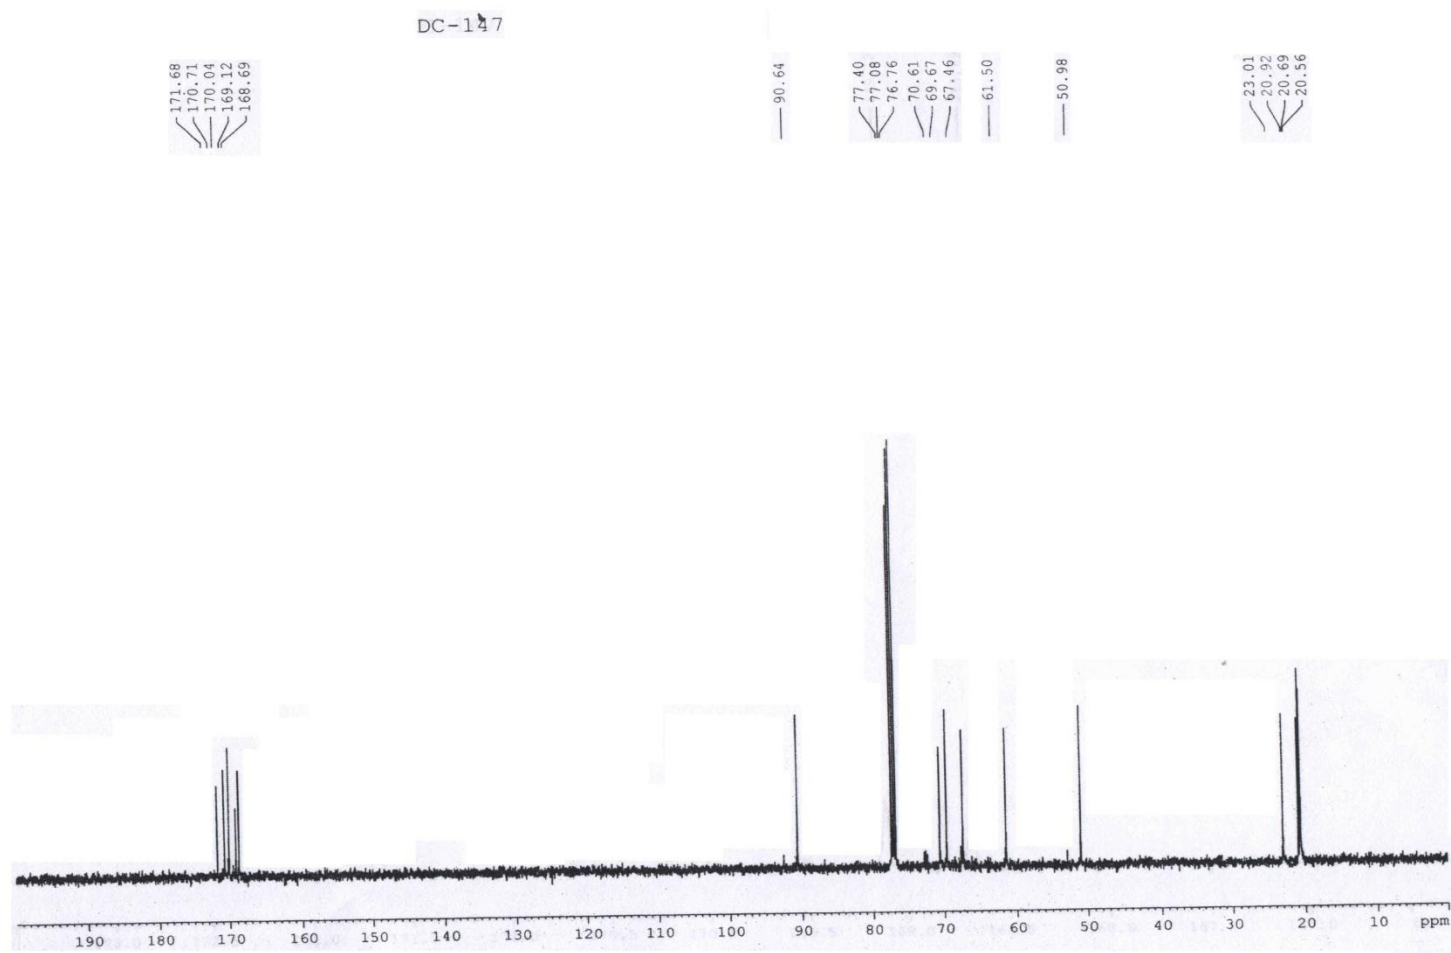

**Fig. 8**  $^{13}\text{C}$ -NMR spectra (100 MHz,  $\text{CDCl}_3$ ) of 1,3,4,6-tetra-*O*-acetyl-2-*N*-acetyl- $\alpha$ -*D*-glucosamine (**2d**)

DC - 184

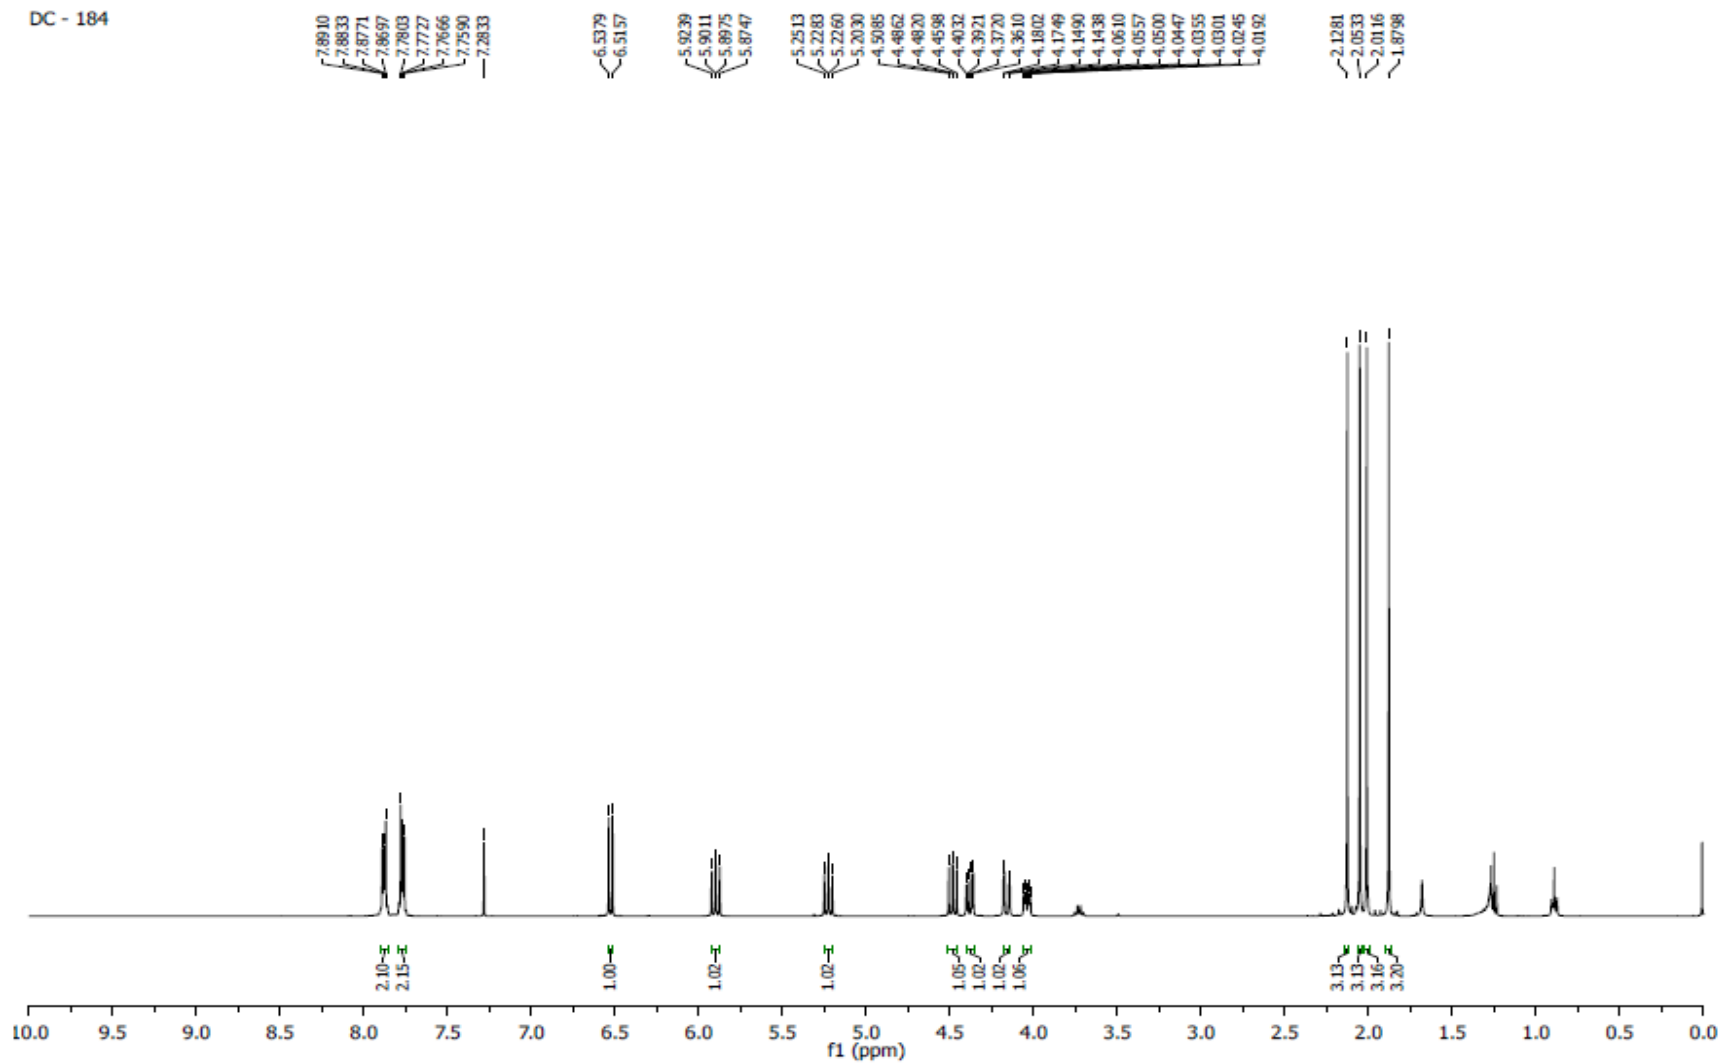

Fig. 9 <sup>1</sup>H-NMR spectra (400 MHz, CDCl<sub>3</sub>) of 1,3,4,6-tetra-*O*-acetyl-2-phthalimido-2-deoxy-β-D-glucopyranoside (**2e**)

DC - 184

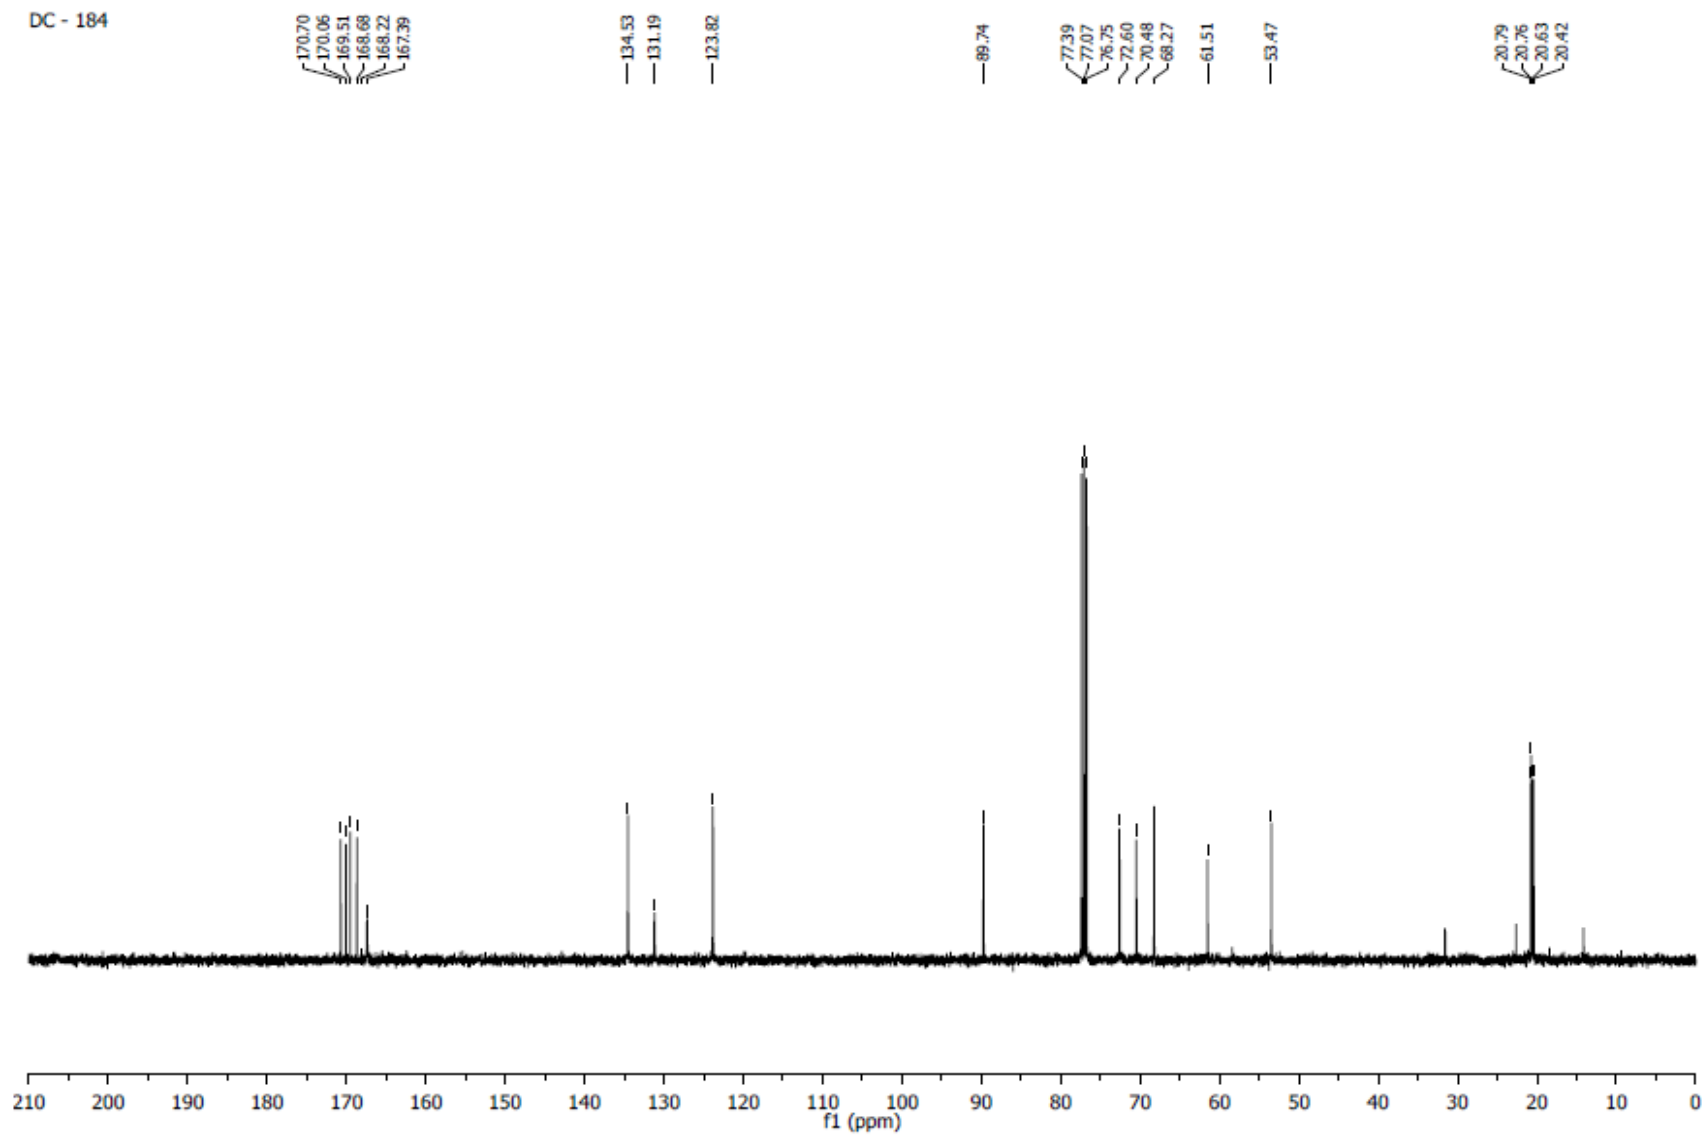

**Fig. 10**  $^{13}\text{C}$ -NMR spectra (100 MHz,  $\text{CDCl}_3$ ) of 1,3,4,6-tetra-*O*-acetyl-2-phthalimido-2-deoxy- $\beta$ -D-glucopyranoside (**2e**)



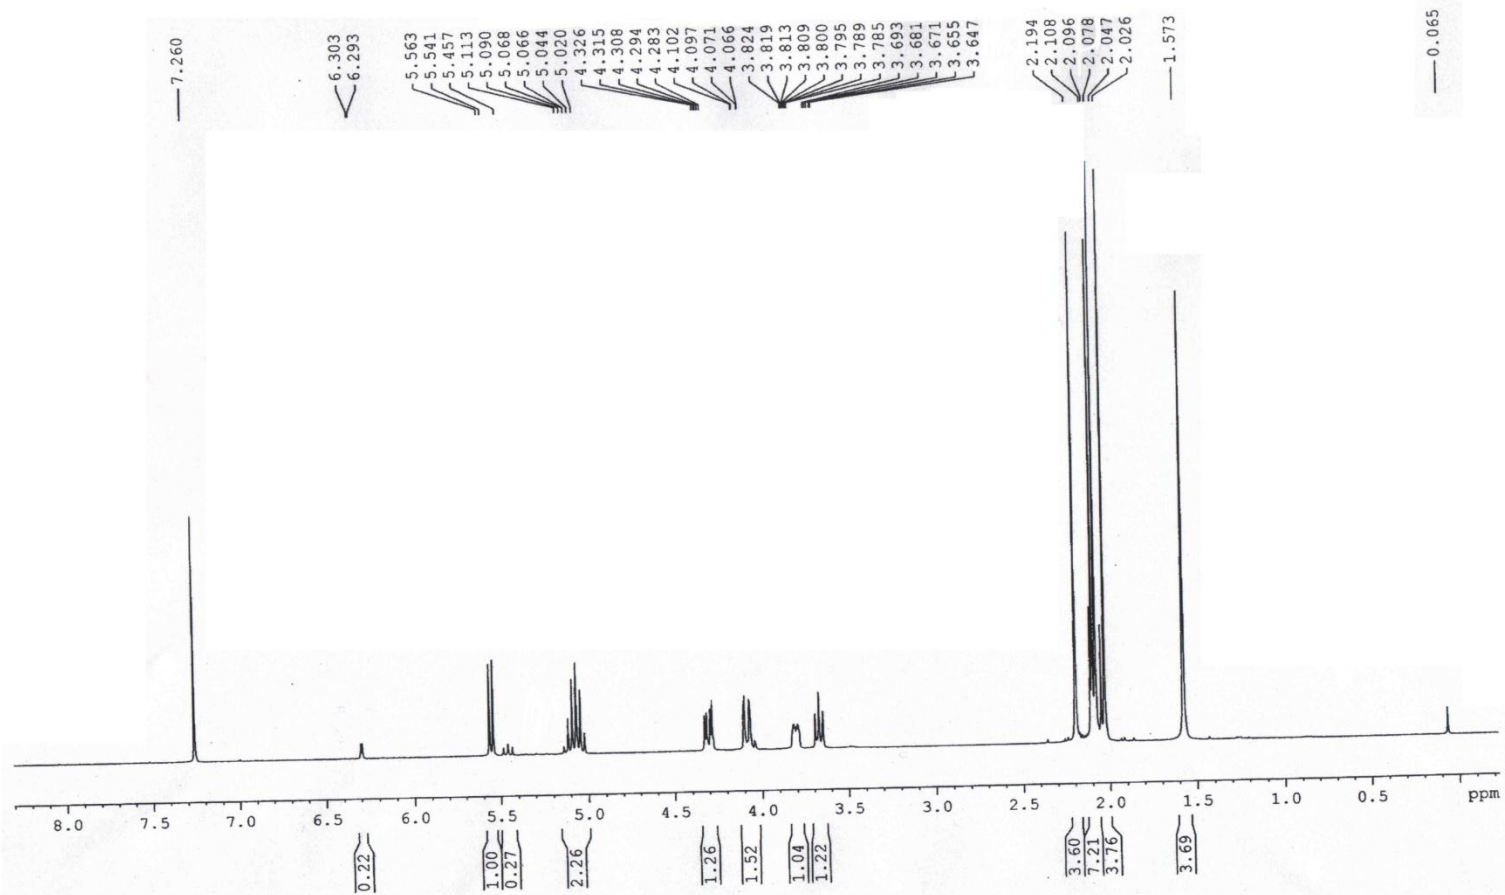

**Fig. 11**  $^1\text{H-NMR}$  spectra (400 MHz,  $\text{CDCl}_3$ ) of 1,3,4,6-tetra-*O*-acetyl-2-azido-2-deoxy-*D*-glucopyranoside (**2f**)

DC - 176

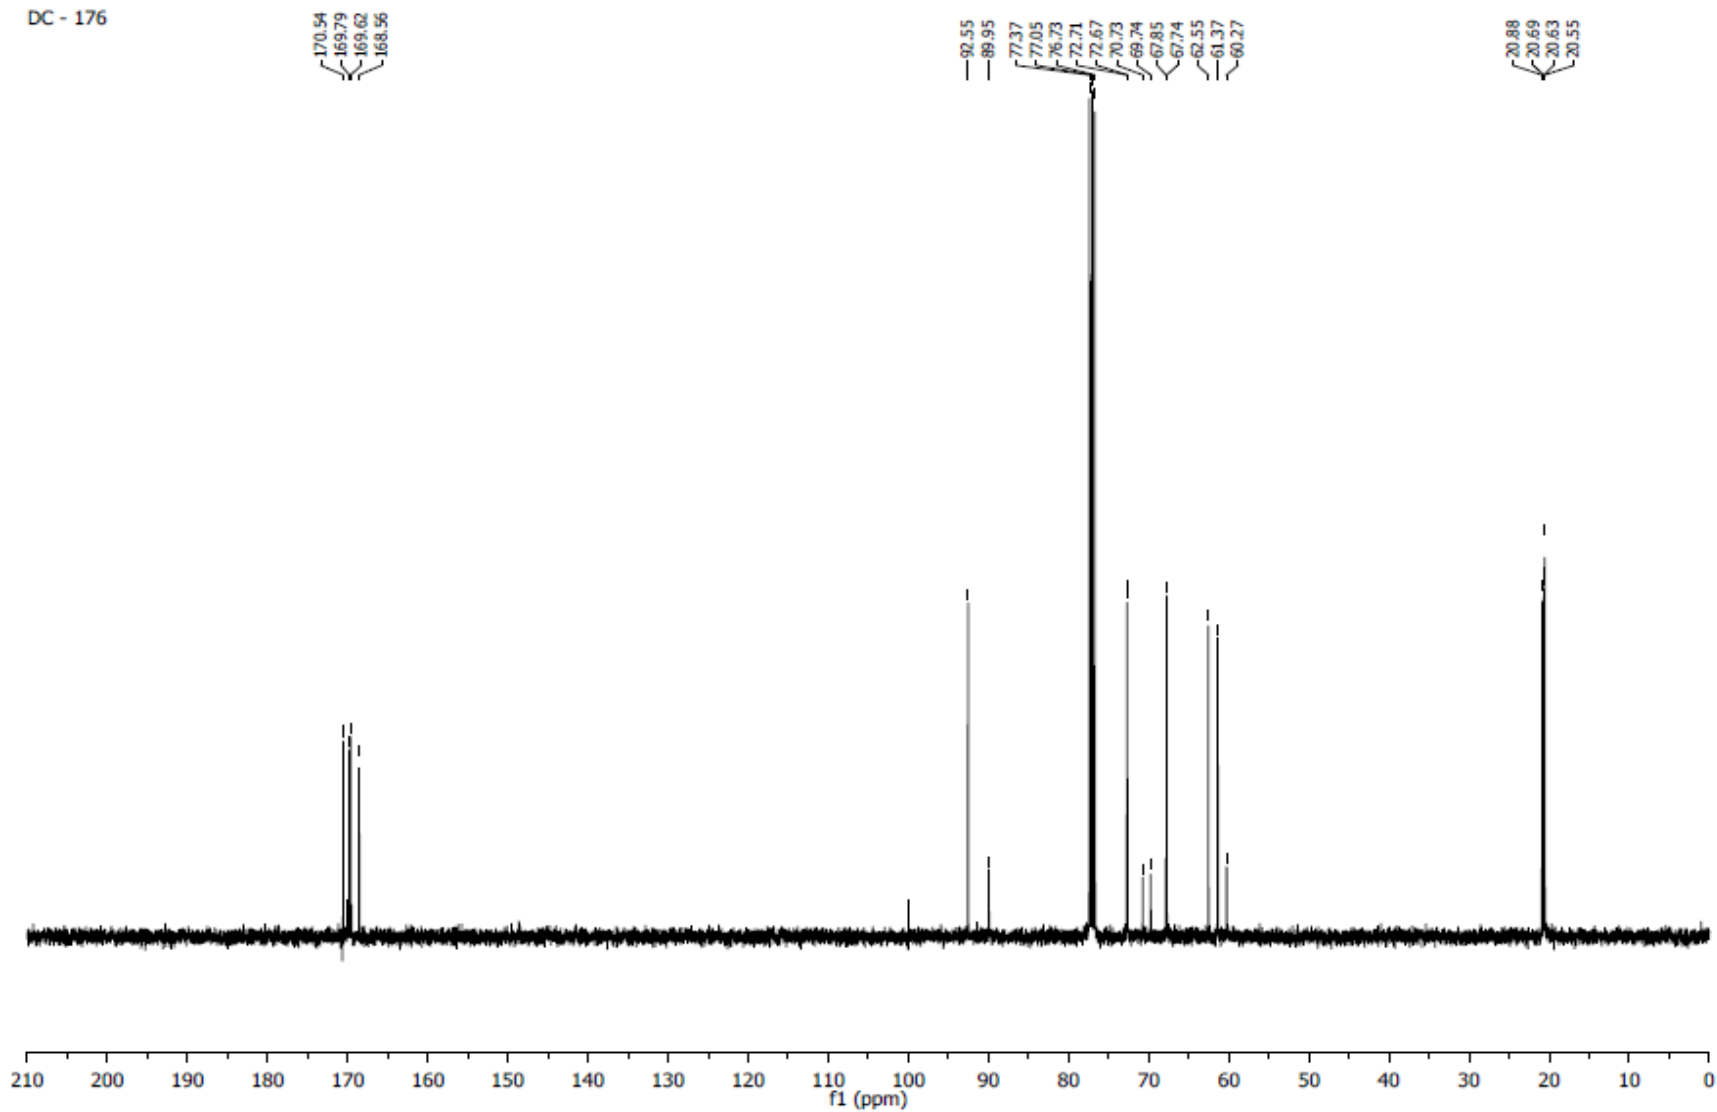

**Fig. 12** <sup>13</sup>C-NMR spectra (100 MHz, CDCl<sub>3</sub>) of 1,3,4,6-tetra-*O*-acetyl-2-azido-2-deoxy-D-glucopyranoside (**2f**)

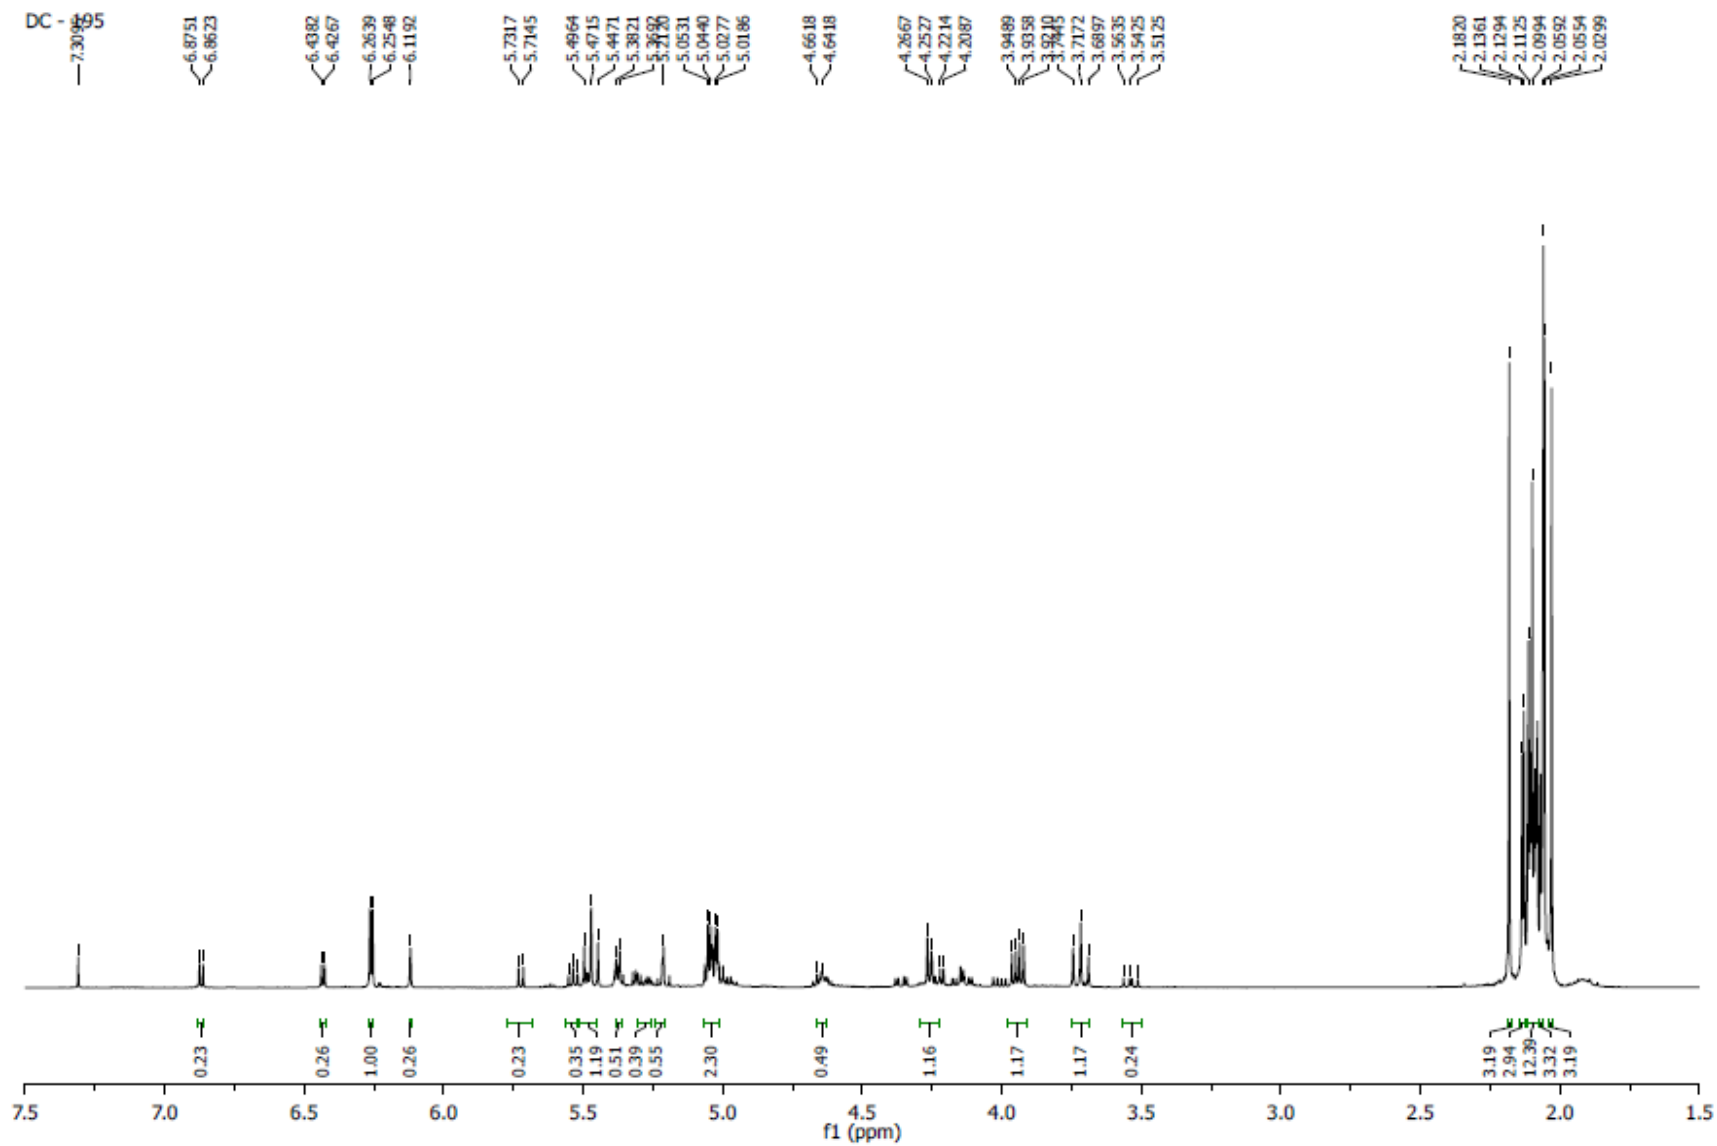

Fig. 13  $^1\text{H-NMR}$  spectra (400 MHz,  $\text{CDCl}_3$ ) of 1,2,3,4-Tetra-*O*-acetyl-D-xylopyranoside (**2g**)

DC - 195

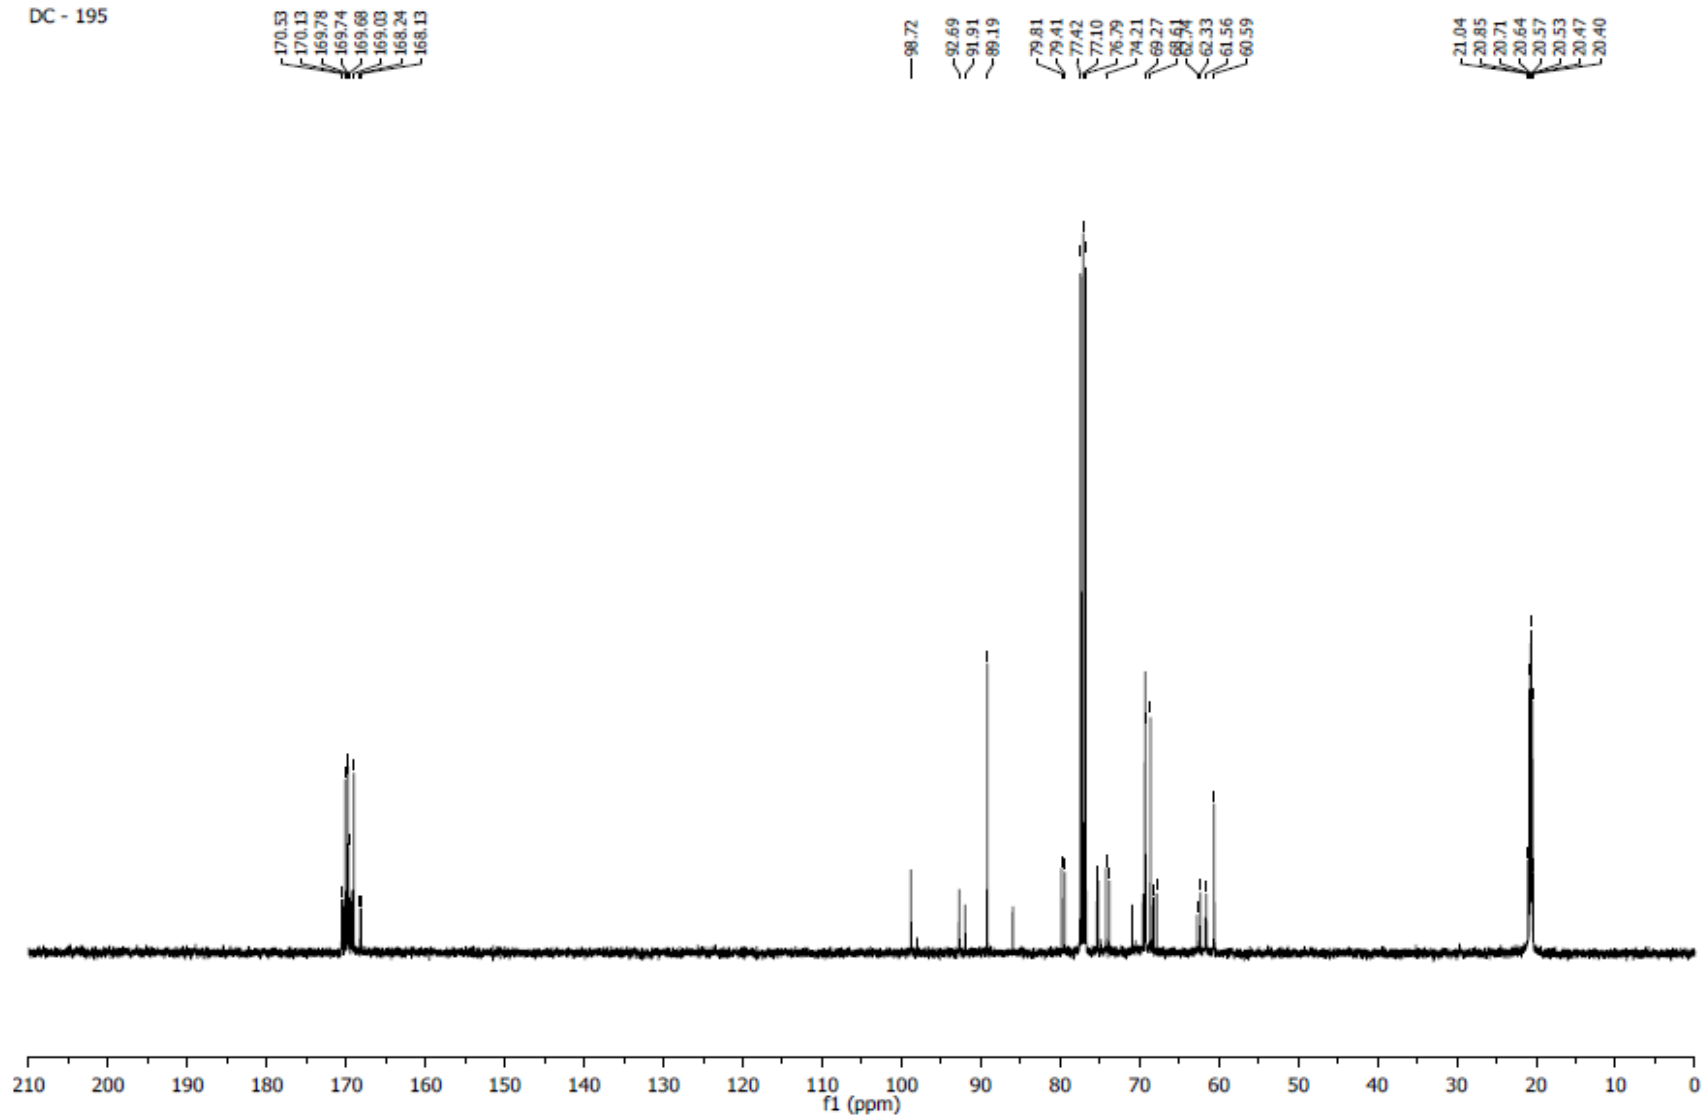

**Fig. 14**  $^{13}\text{C}$ -NMR spectra (100 MHz,  $\text{CDCl}_3$ ) of 1,2,3,4-Tetra-*O*-acetyl-D-xylopyranoside (**2g**)

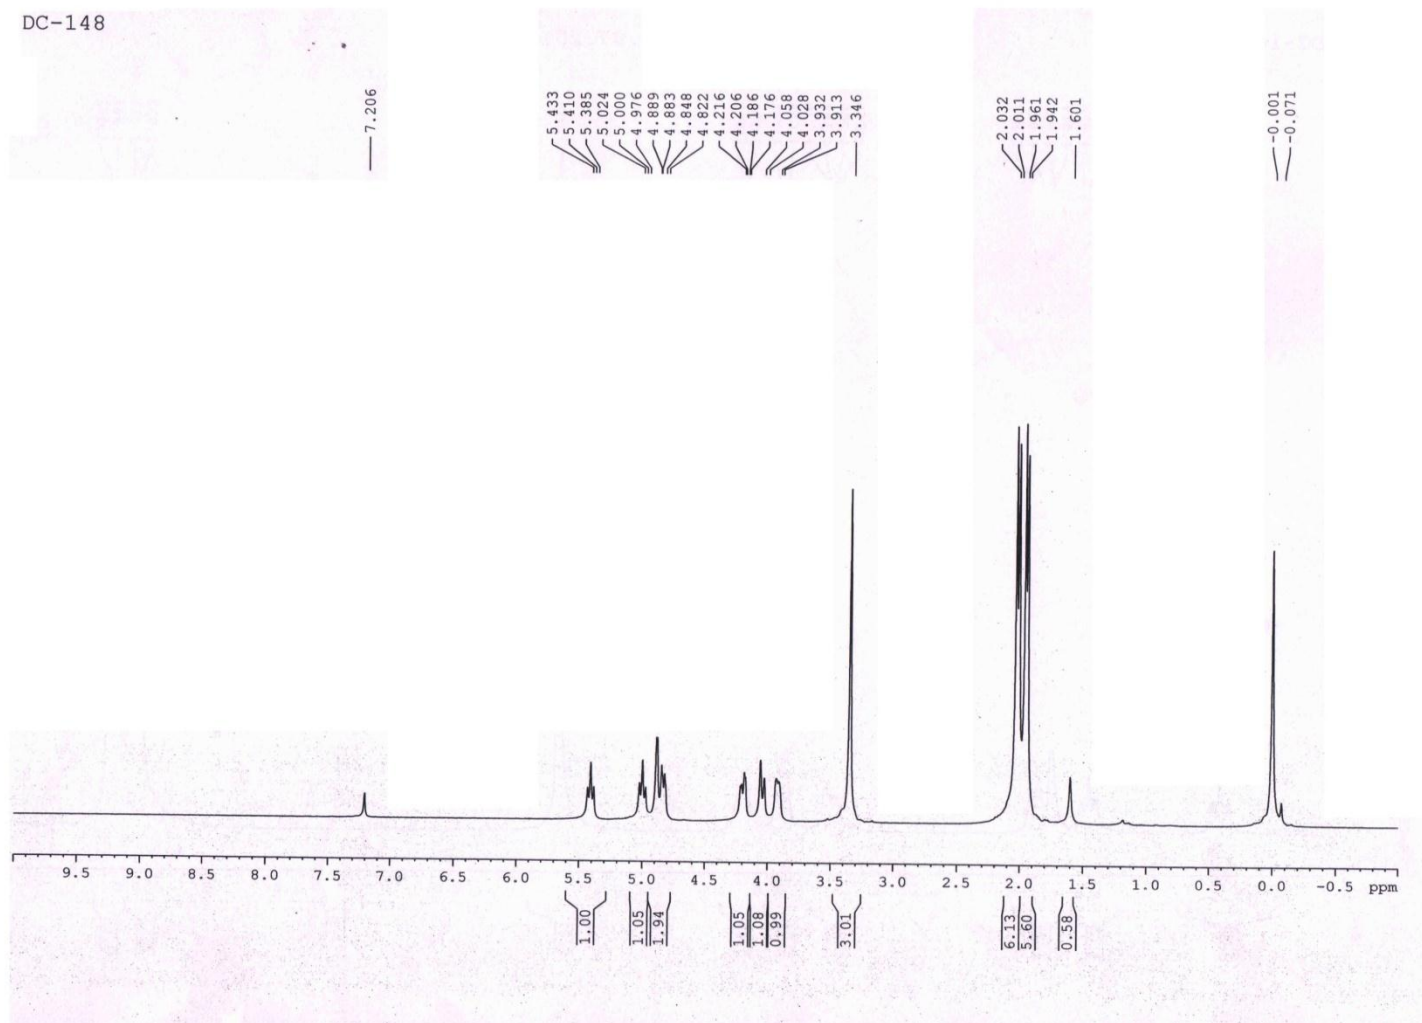

**Fig. 15**  $^1\text{H-NMR}$  spectra (400 MHz,  $\text{CDCl}_3$ ) of 1-*O*-Methyl-2,3,4,6-tetra-*O*-acetyl- $\alpha$ -D-glucopyranoside (**2h**)

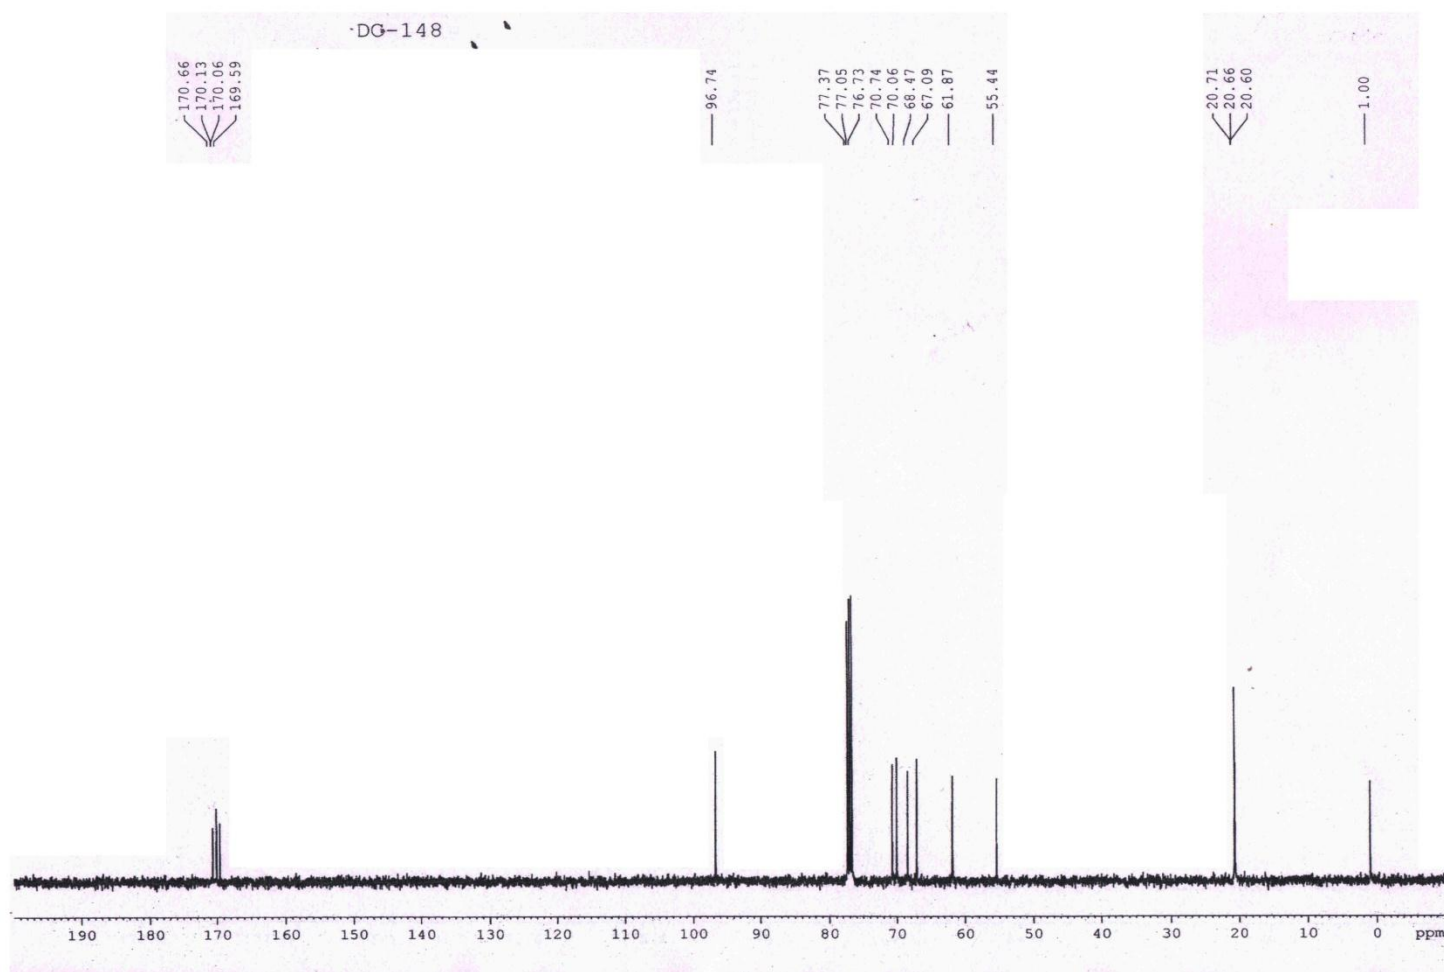

**Fig. 16**  $^{13}\text{C}$ -NMR spectra (100 MHz,  $\text{CDCl}_3$ ) of 1-*O*-Methyl-2,3,4,6-tetra-*O*-acetyl- $\alpha$ -D-glucopyranoside (**2h**)

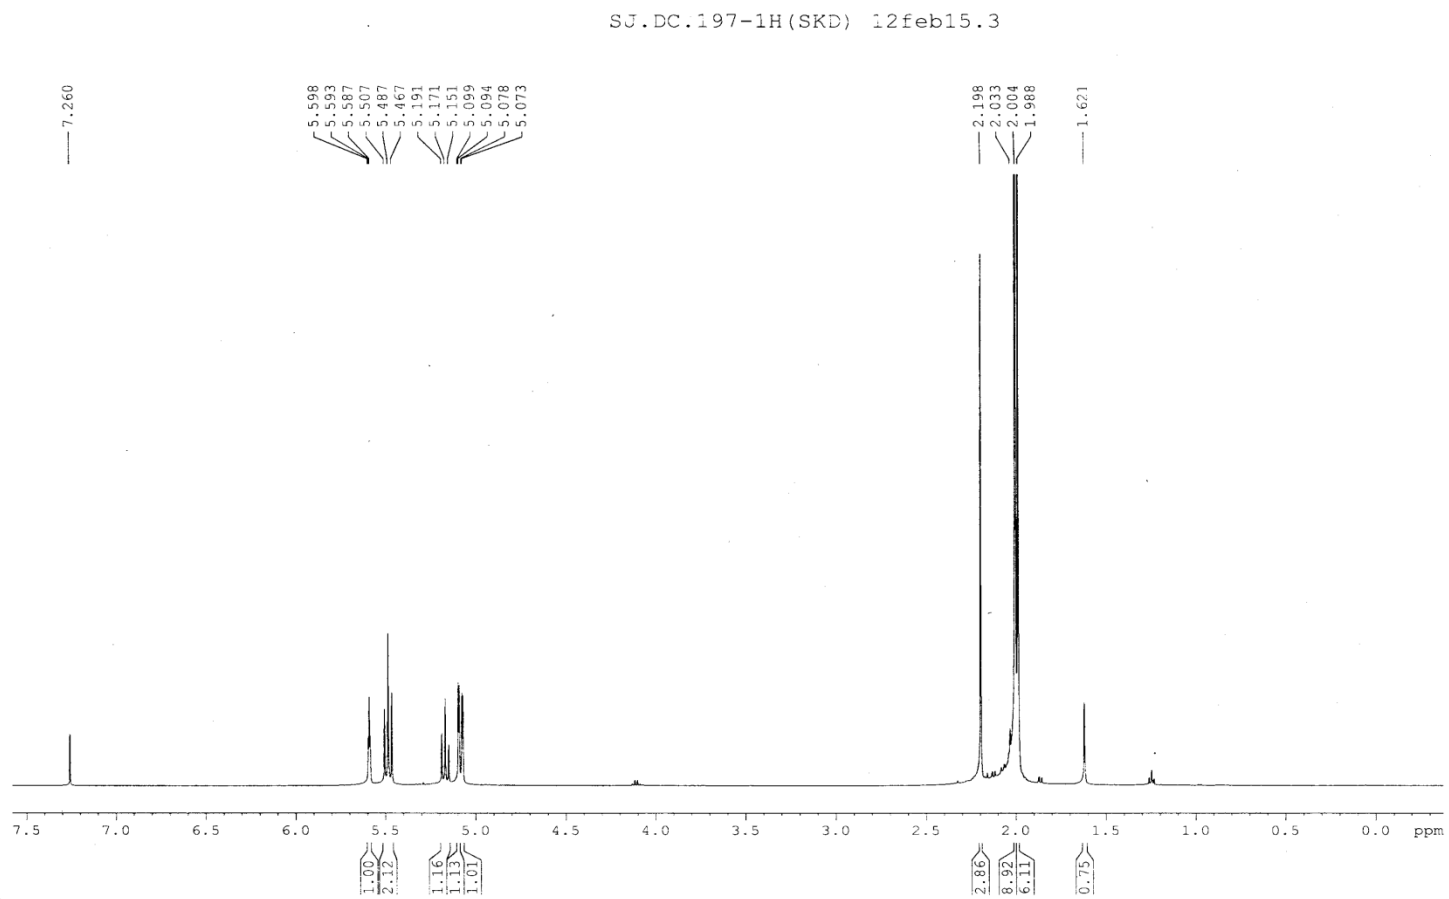

**Fig. 17** <sup>1</sup>H-NMR spectra (400 MHz, CDCl<sub>3</sub>) of Hexa-*O*-acetyl-*myo*-inositol (**2i**)

DC - 197

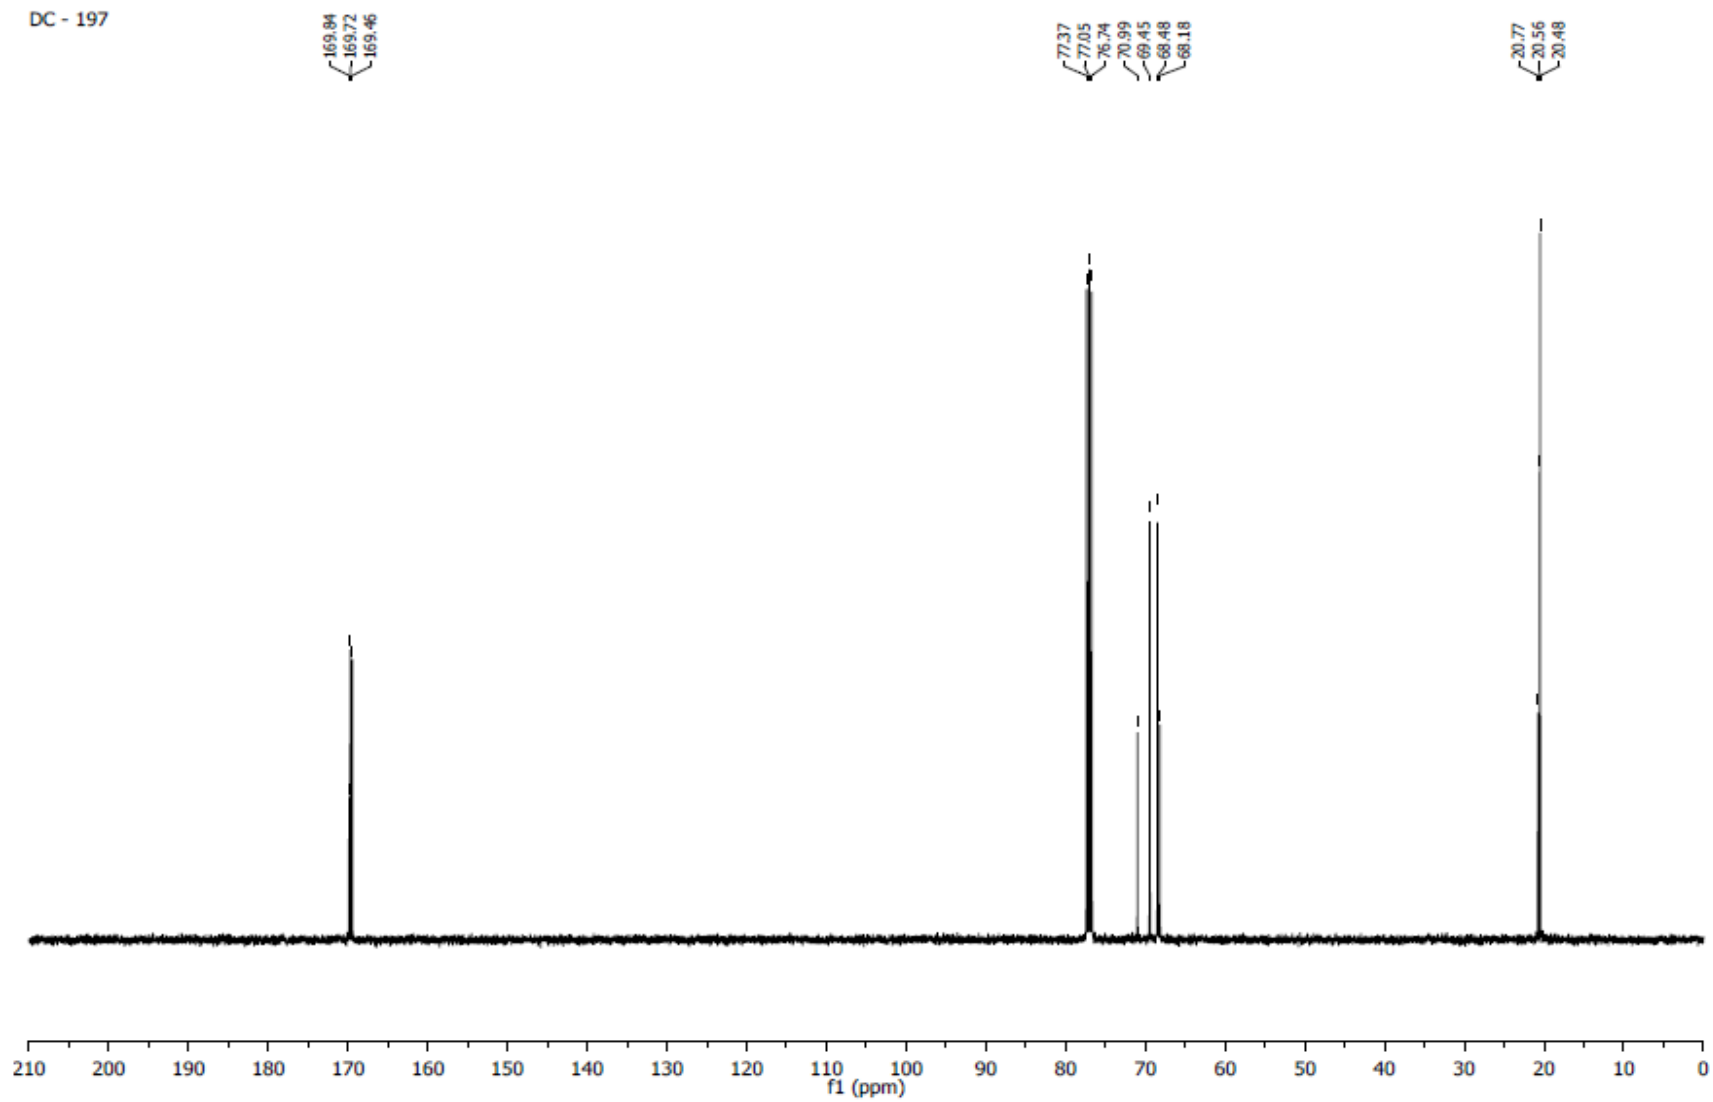

**Fig. 18** <sup>13</sup>C-NMR spectra (100 MHz, CDCl<sub>3</sub>) of Hexa-*O*-acetyl-*myo*-inositol (**2i**)



DC - 196

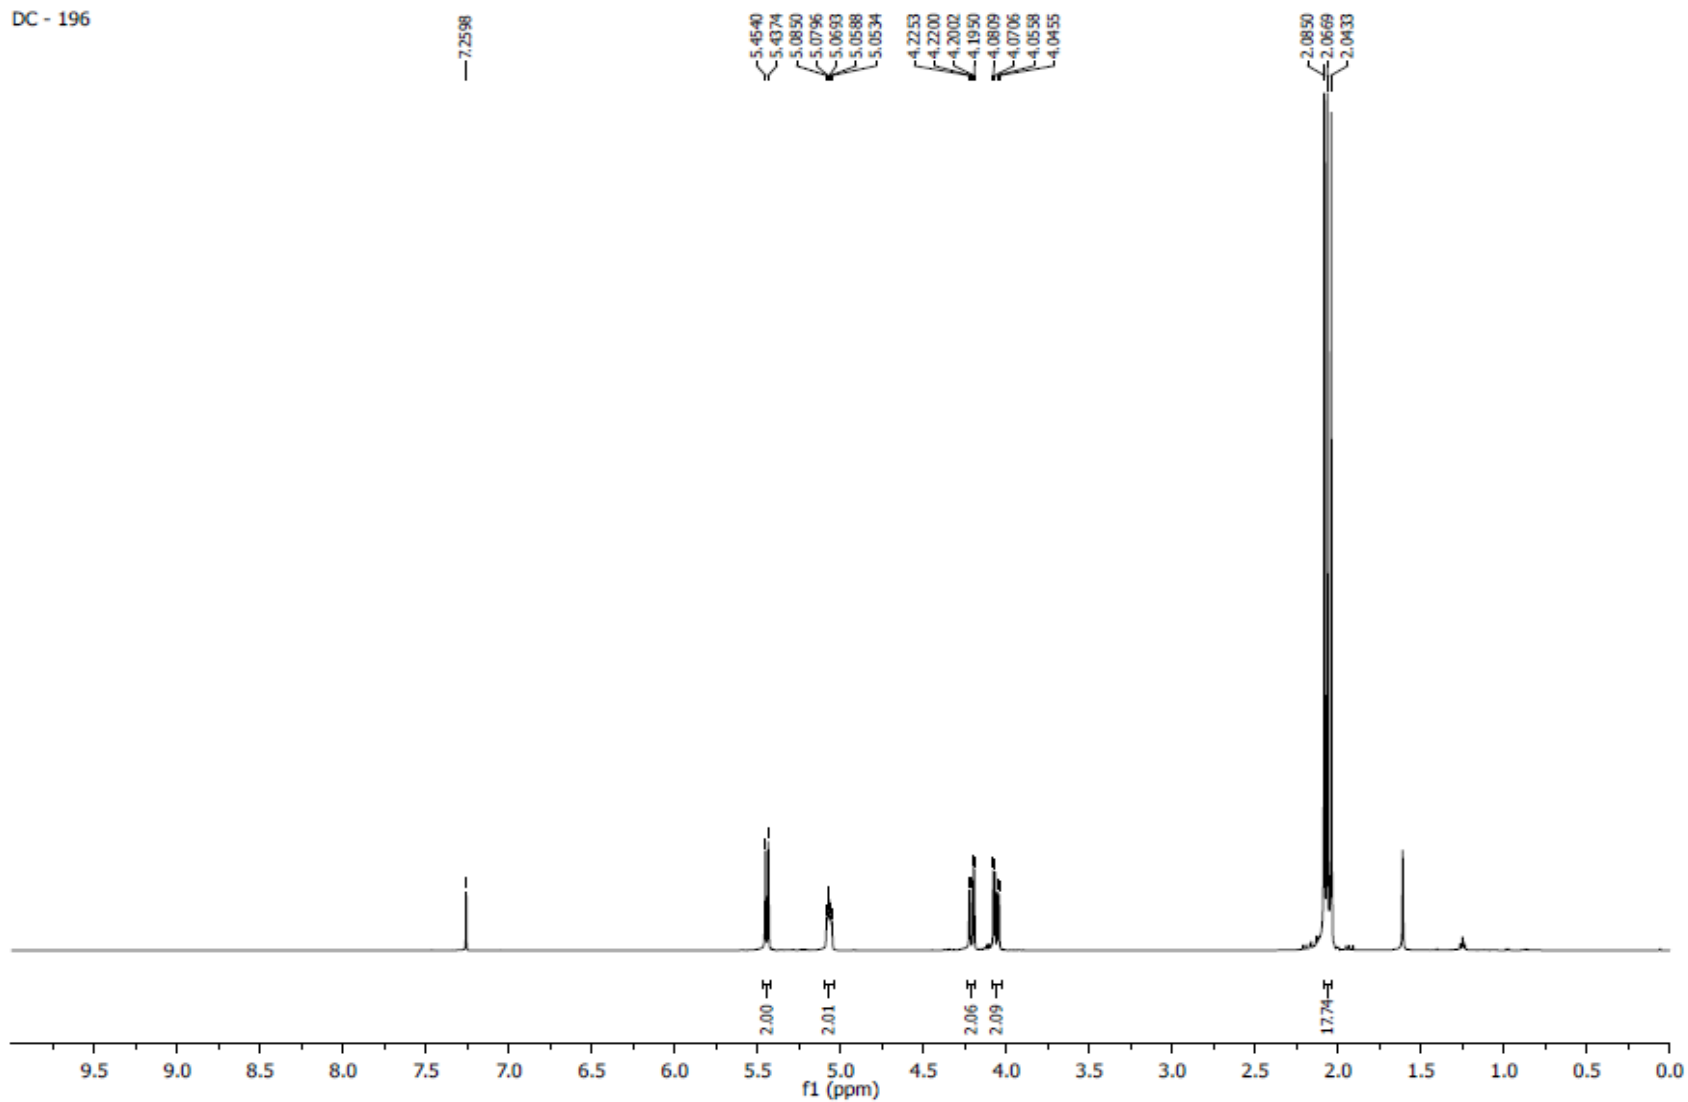

Fig. 19 <sup>1</sup>H-NMR spectra (400 MHz, CDCl<sub>3</sub>) of Hexa-*O*-acetyl-D-mannitol (2j)

DC - 196

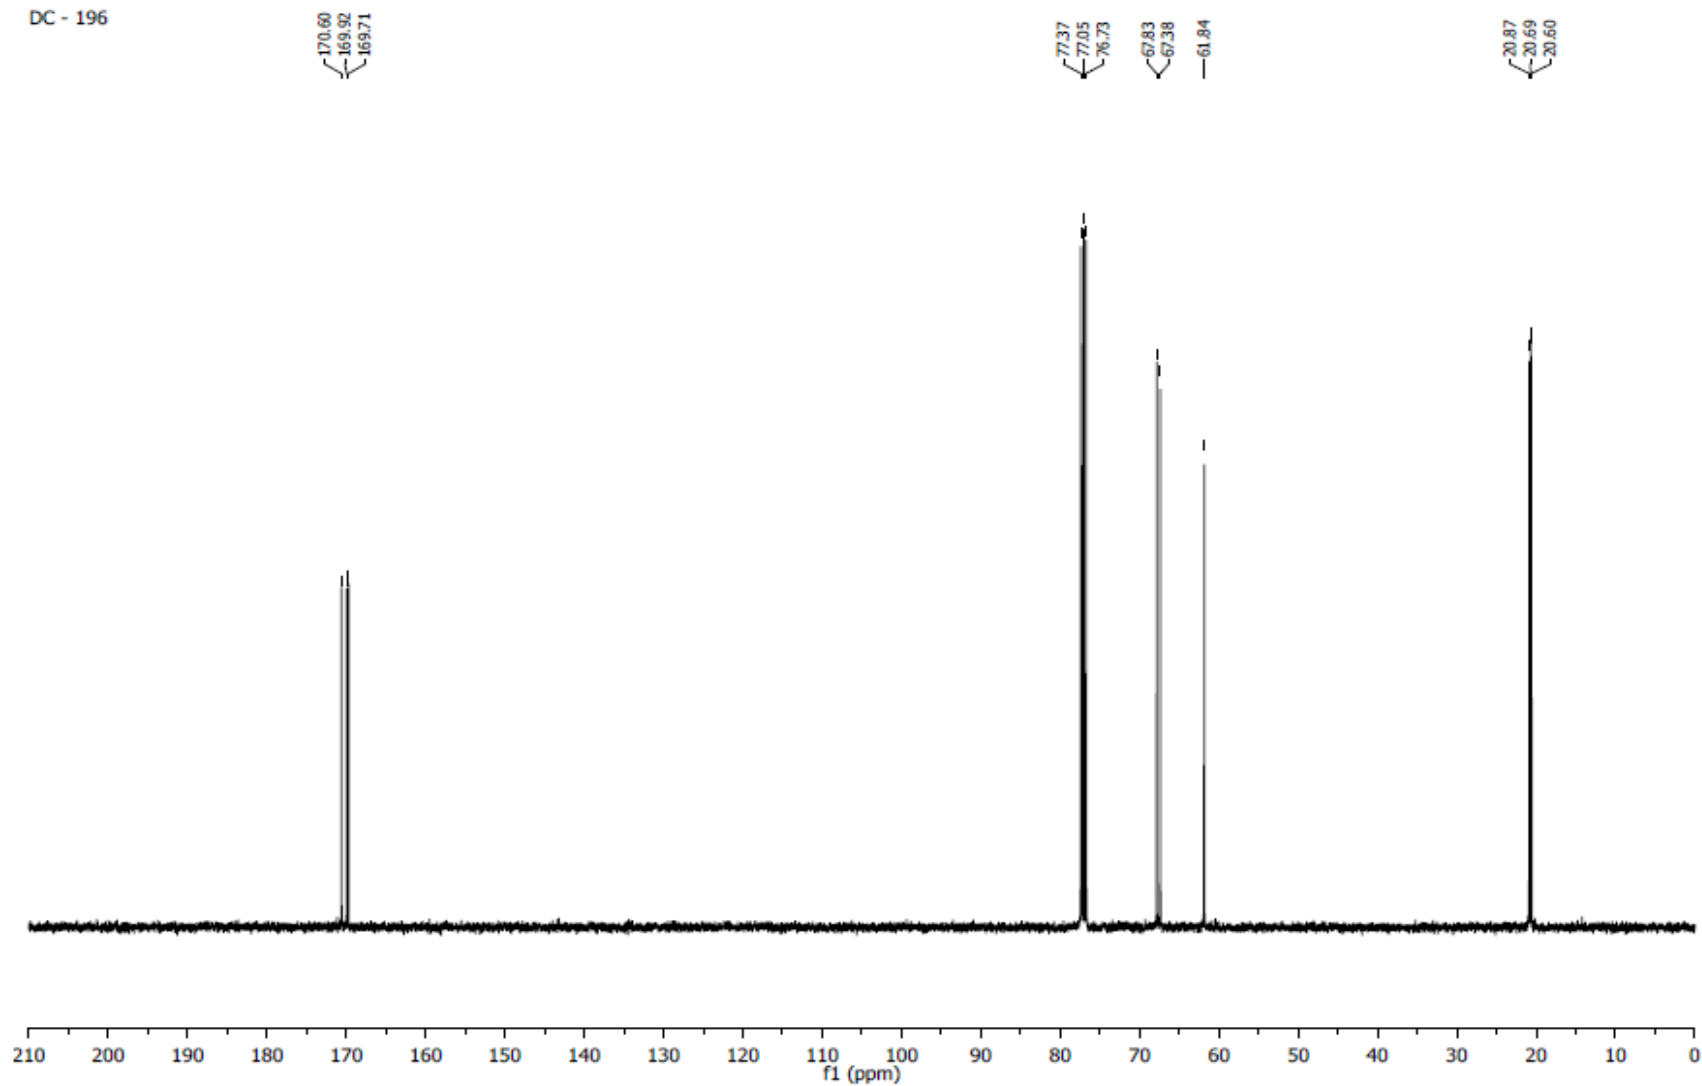

Fig. 20  $^{13}\text{C}$ -NMR spectra (100 MHz,  $\text{CDCl}_3$ ) of Hexa-*O*-acetyl-D-mannitol (**2j**)

DC - 155 (A)

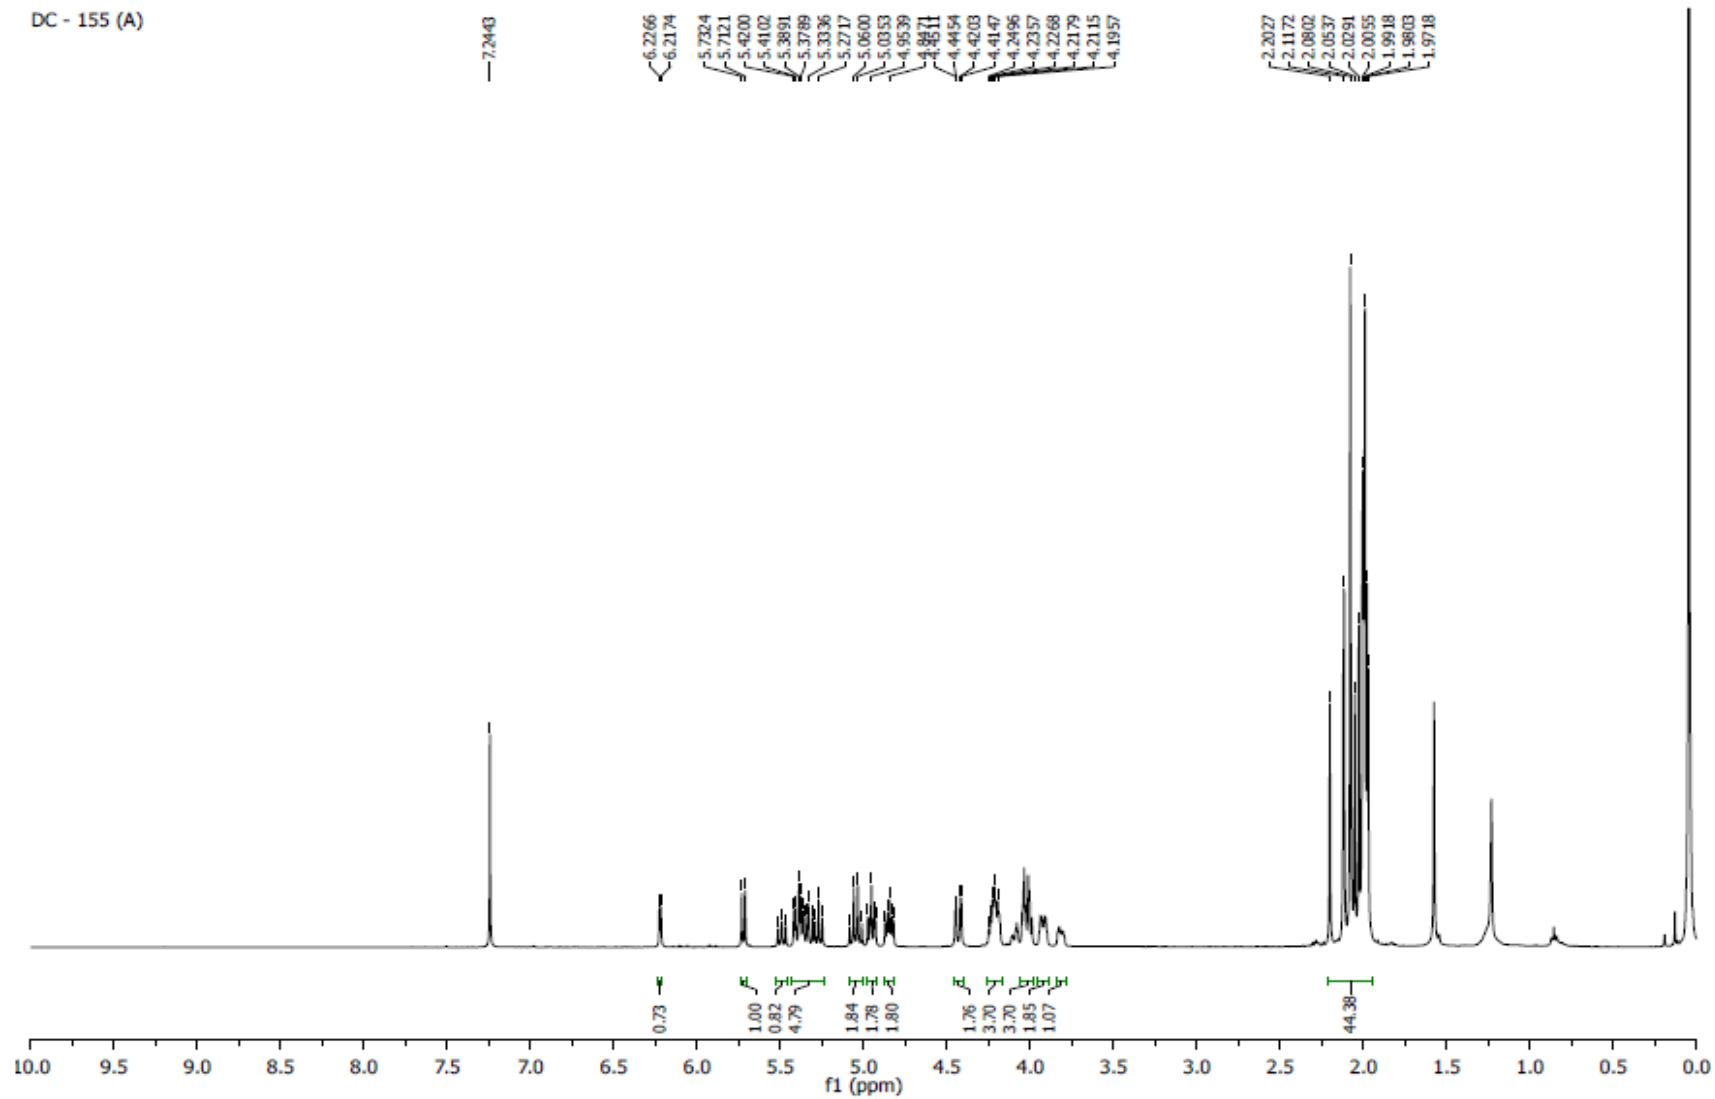

Fig. 21 <sup>1</sup>H-NMR spectra (400 MHz, CDCl<sub>3</sub>) of D-maltose octa-O-acetate (2k)

DC - 155

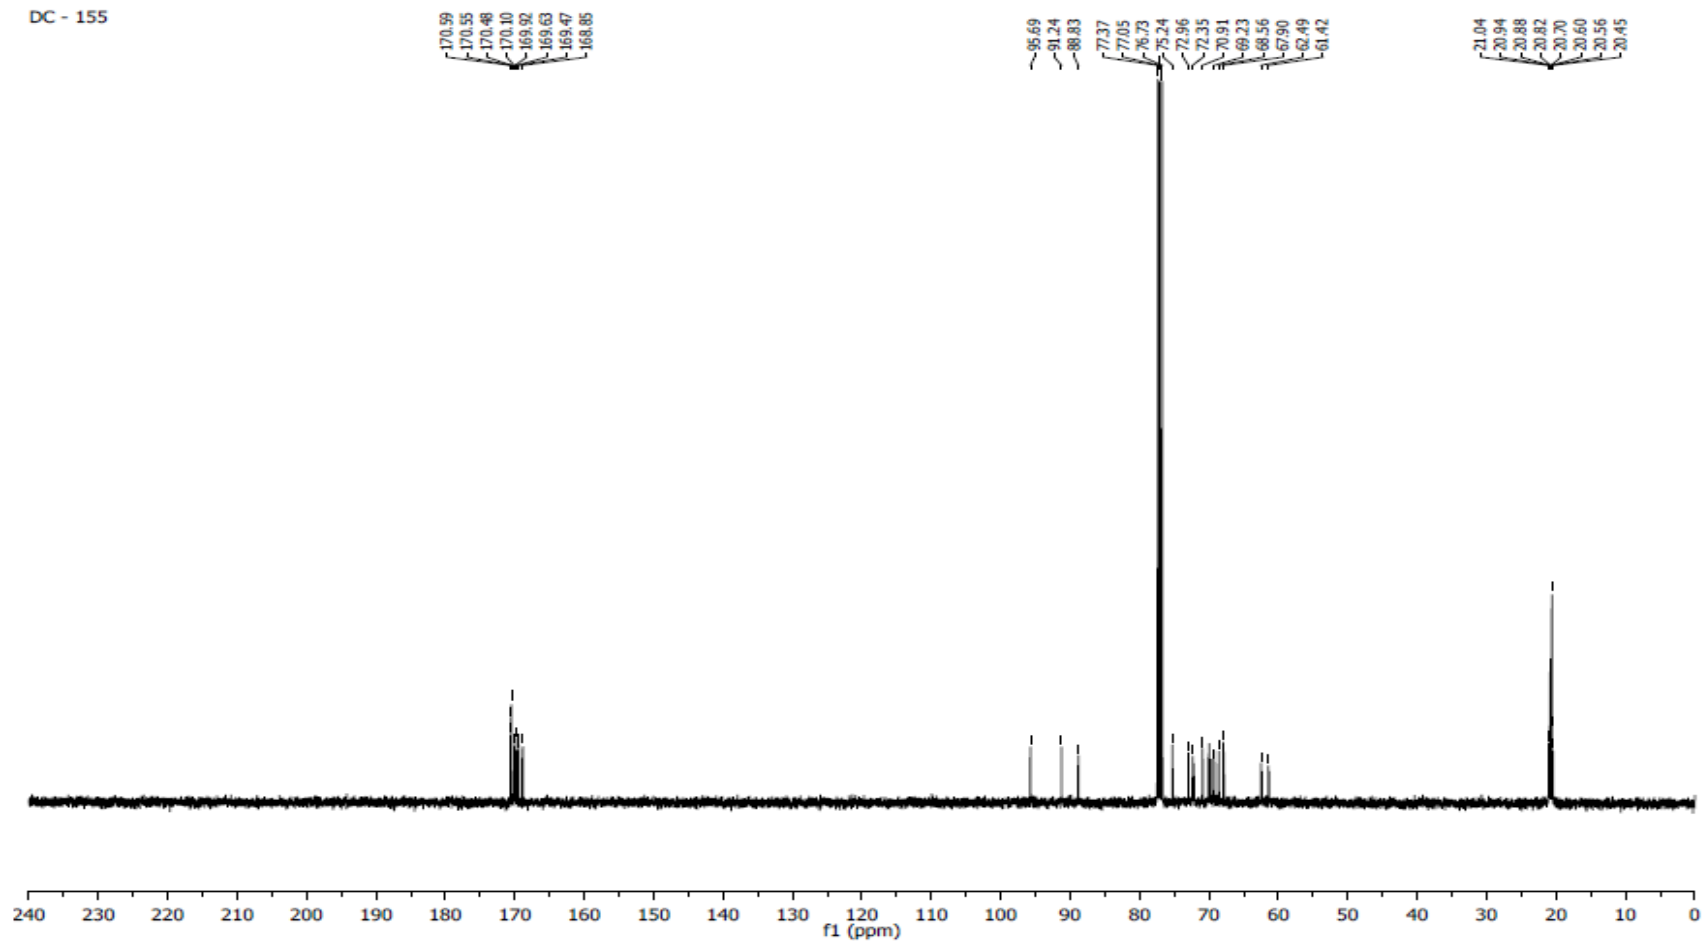

Fig. 22  $^{13}\text{C}$ -NMR spectra (100 MHz,  $\text{CDCl}_3$ ) of D-maltose octa-*O*-acetate (2k)

DC - 156 (B)

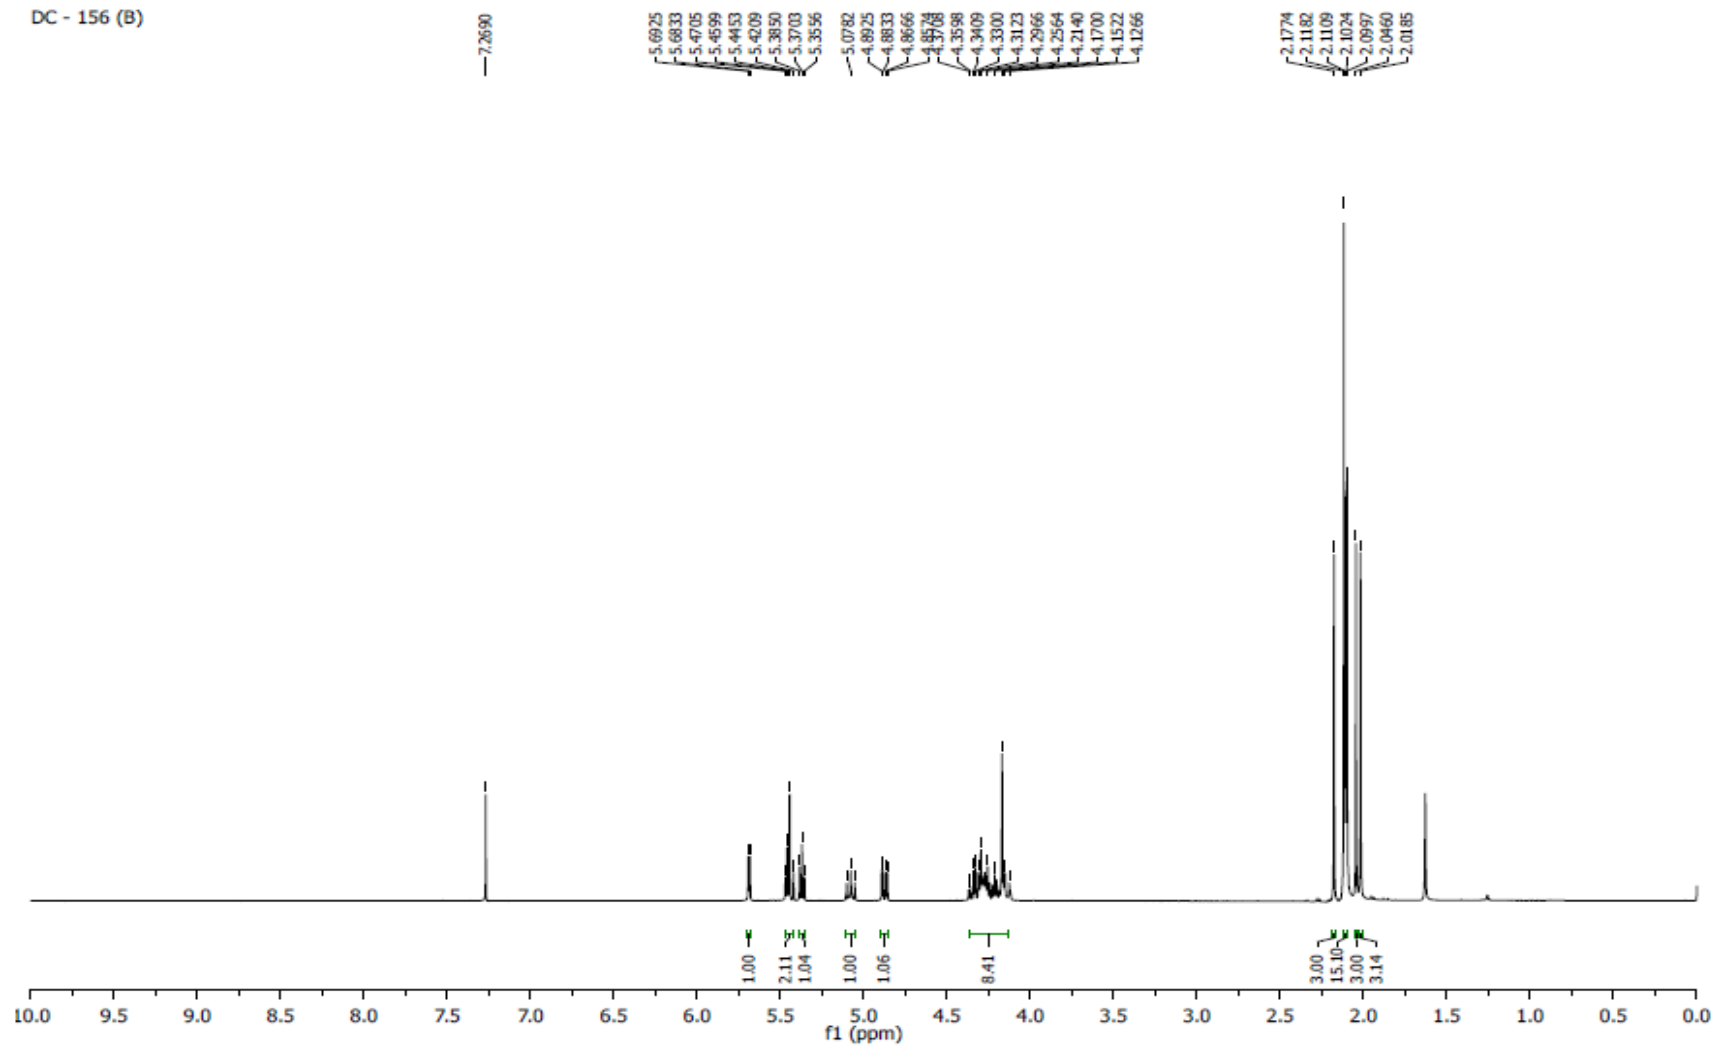

Fig. 23 <sup>1</sup>H-NMR spectra (400 MHz, CDCl<sub>3</sub>) of Sucrose octa-*O*-acetate (2I)

DC - 156

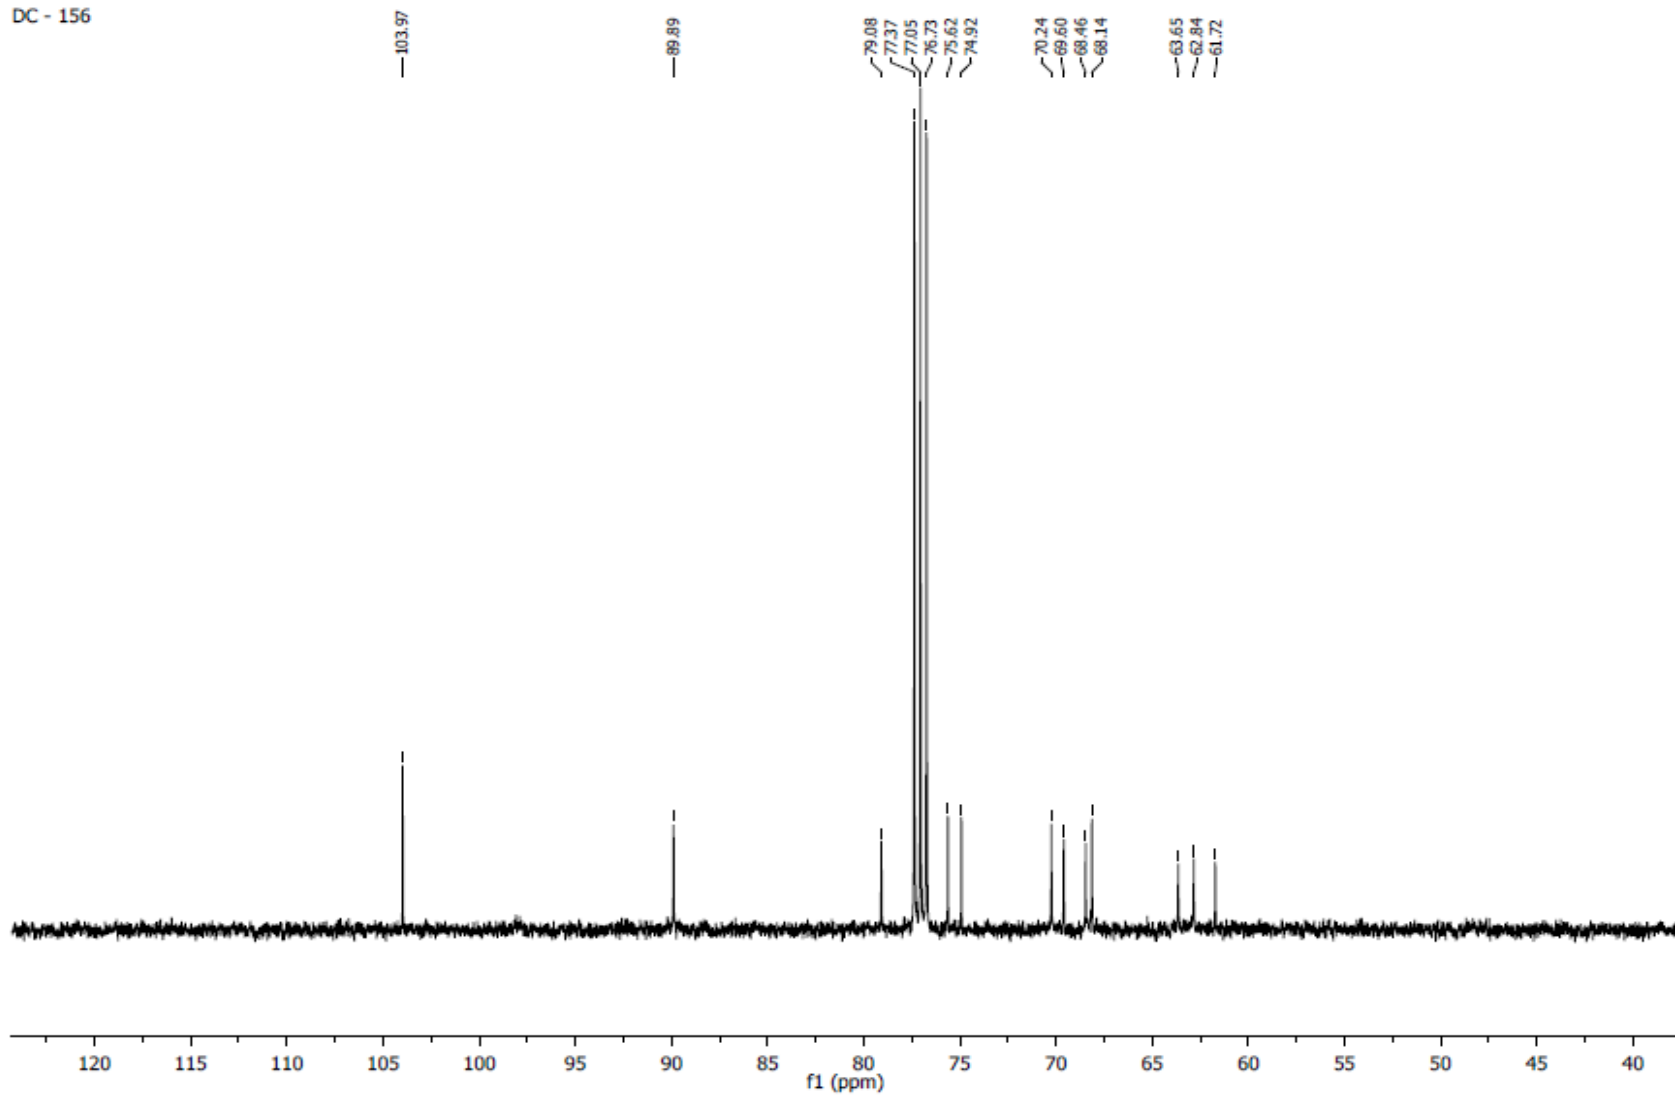

Fig. 24 <sup>13</sup>C-NMR spectra (100 MHz, CDCl<sub>3</sub>) of Sucrose octa-*O*-acetate (21)

DC - 157

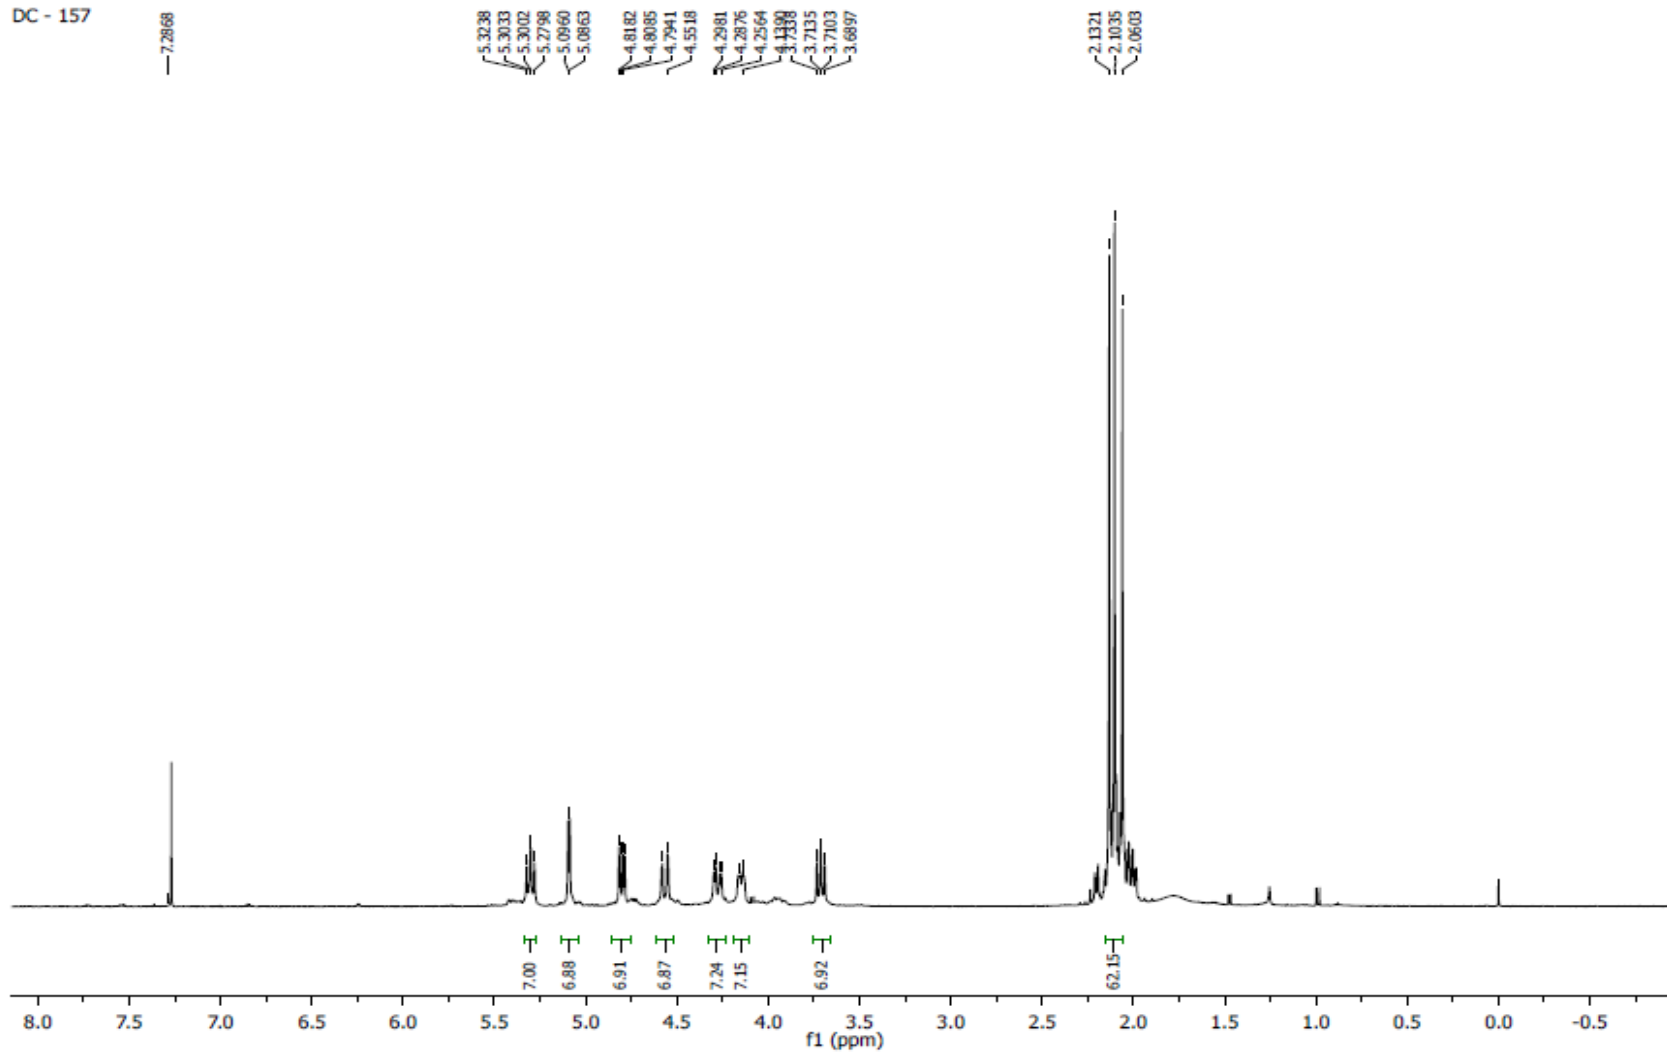

Fig. 25 <sup>1</sup>H-NMR spectra (400 MHz, CDCl<sub>3</sub>) of Per-O-acetylated β-cyclodextrin (2m)

DC - 157

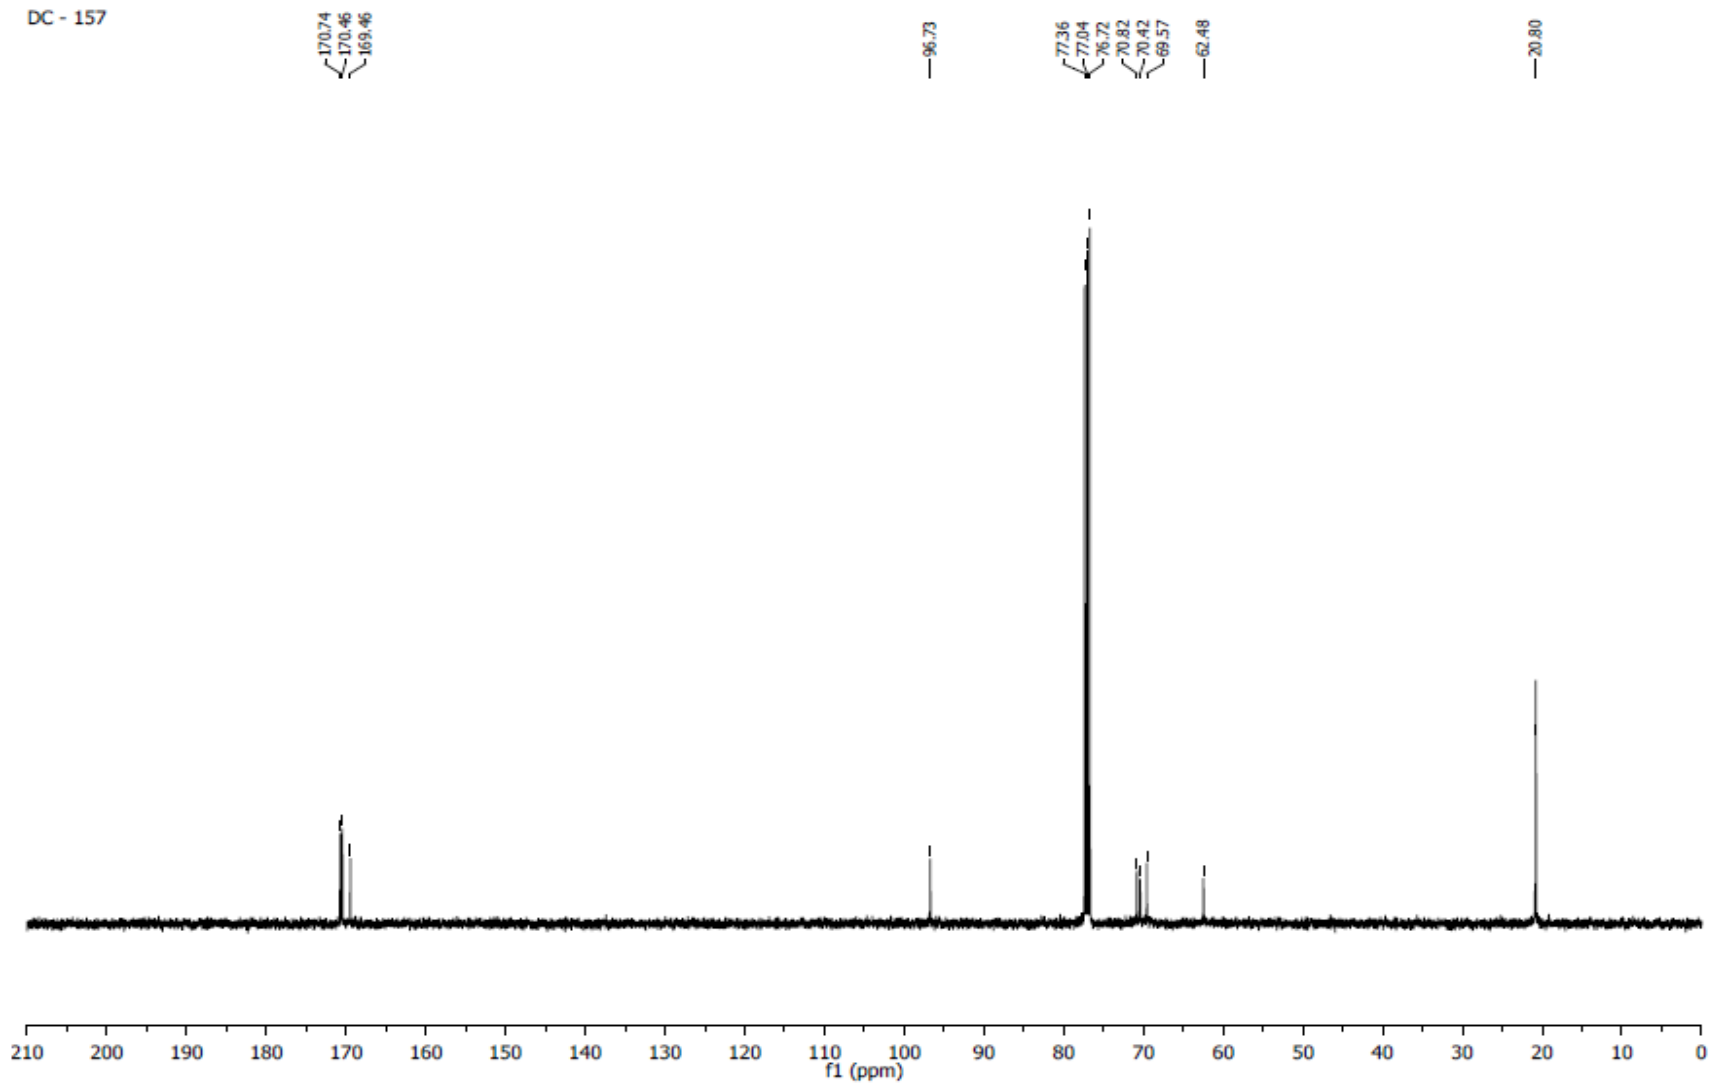

**Fig. 26**  $^{13}\text{C}$ -NMR spectra (100 MHz,  $\text{CDCl}_3$ ) of Per-*O*-acetylated  $\beta$ -cyclodextrin (**2m**)



DC-141B

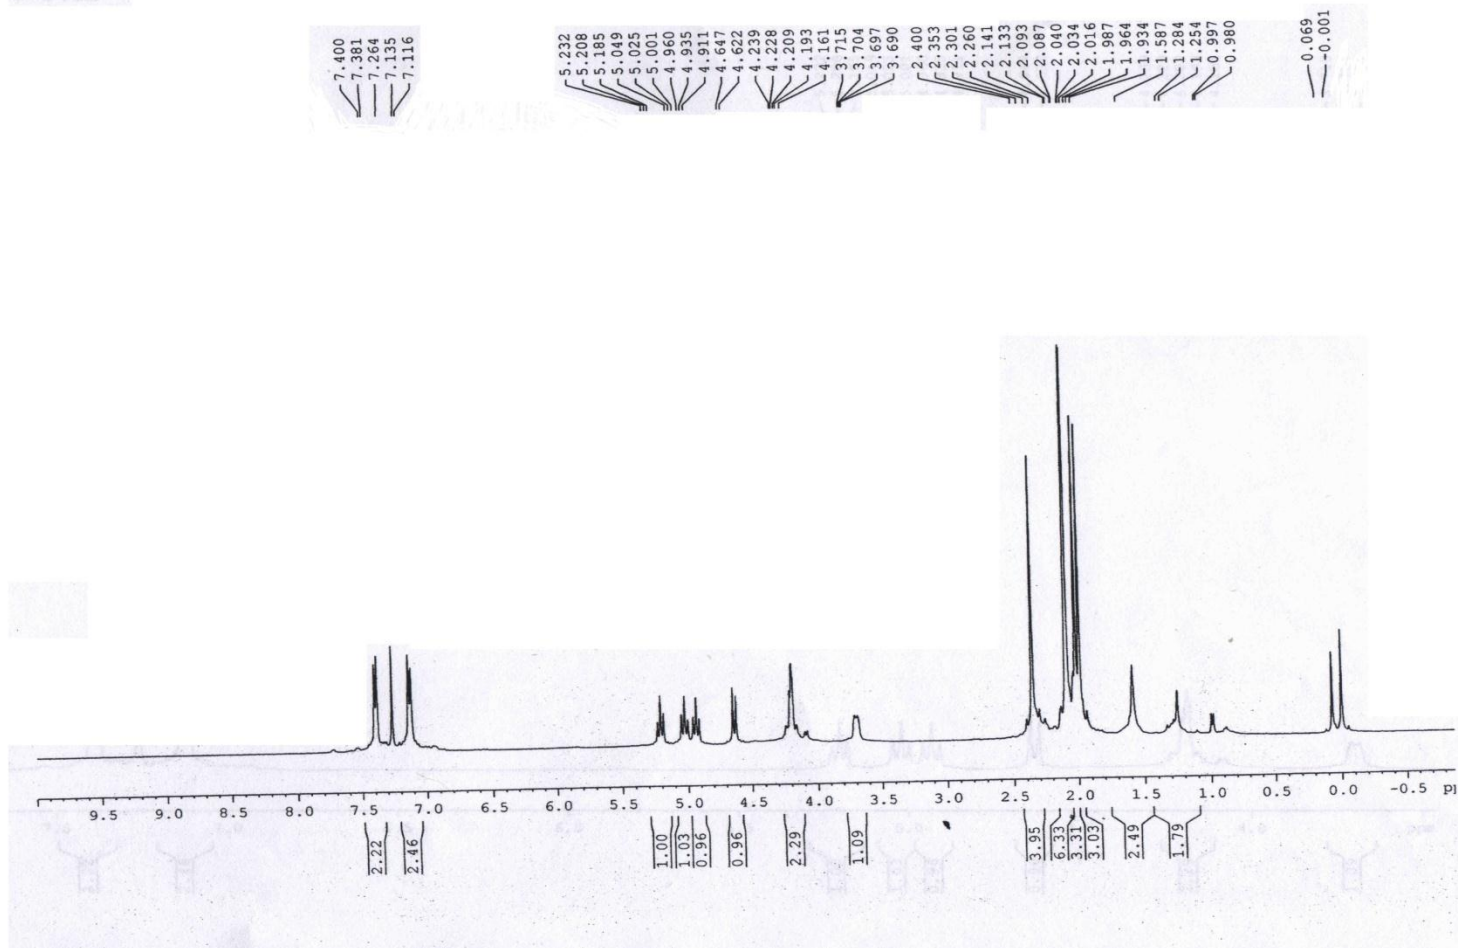

**Fig. 27** <sup>1</sup>H-NMR spectra (400 MHz, CDCl<sub>3</sub>) of *p*-Tolyl 2,3,4,6-*O*-acetyl-1-thio-β-D-glucopyranoside (**3a**)

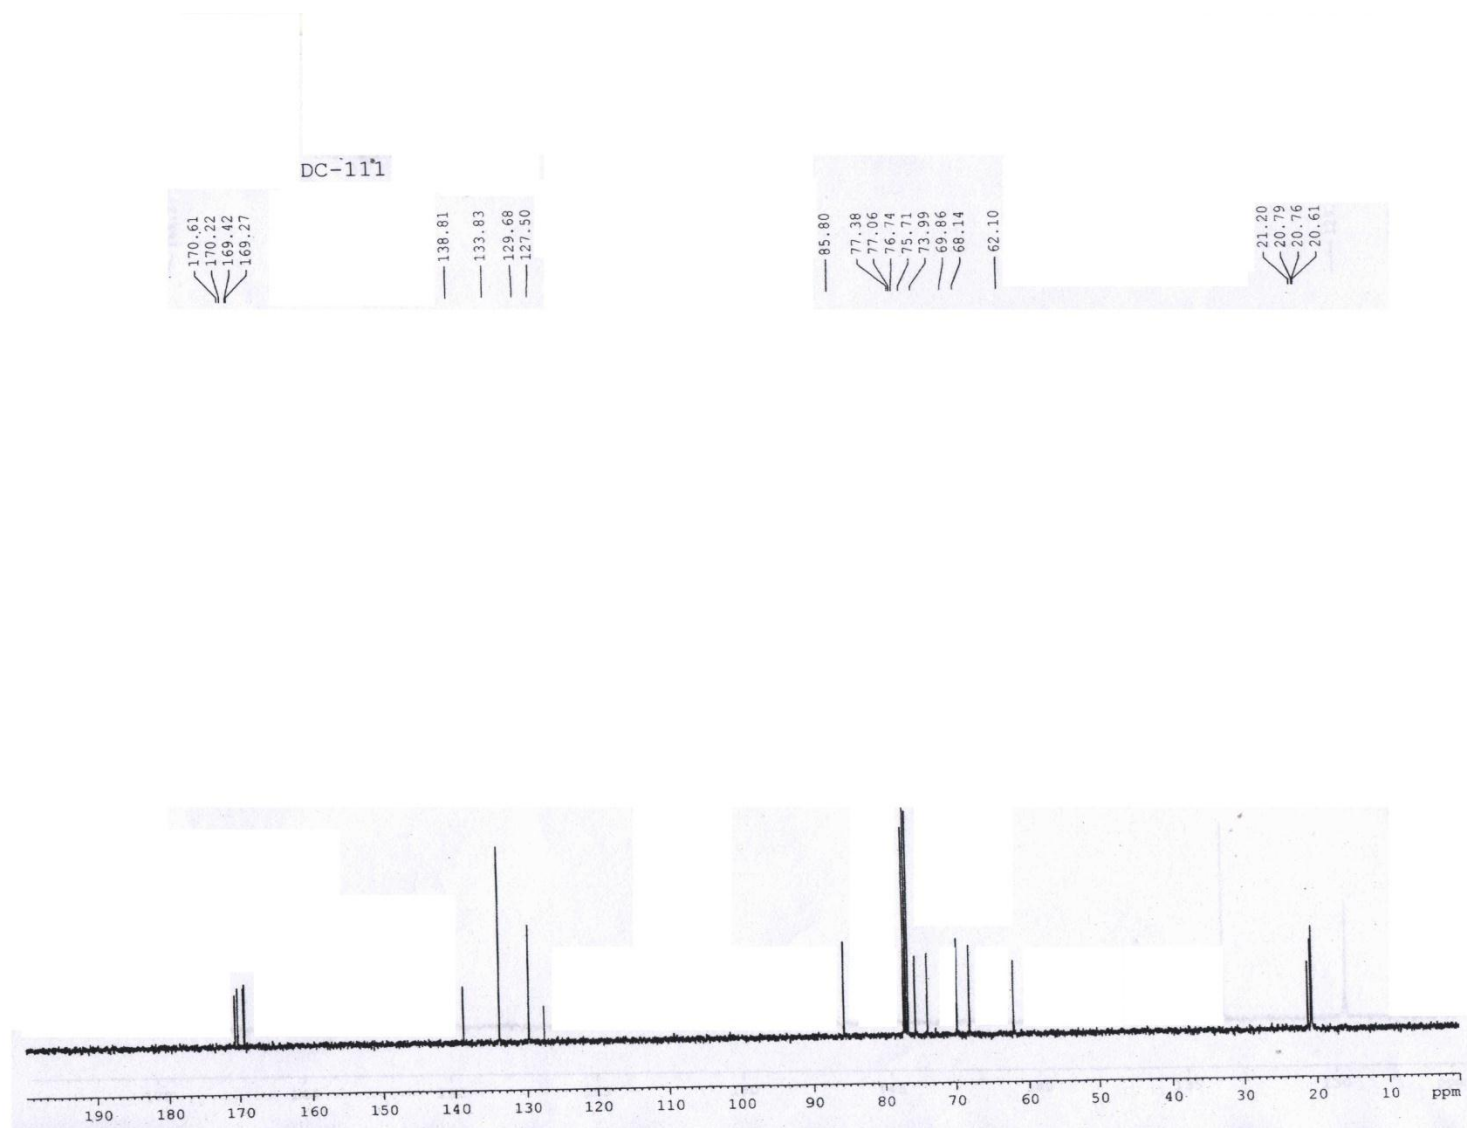

**Fig. 28** <sup>13</sup>C-NMR spectra (100 MHz, CDCl<sub>3</sub>) of *p*-Tolyl 2,3,4,6-*O*-acetyl-1-thio-β-D-glucopyranoside (**3a**)

DC - 163 (B)

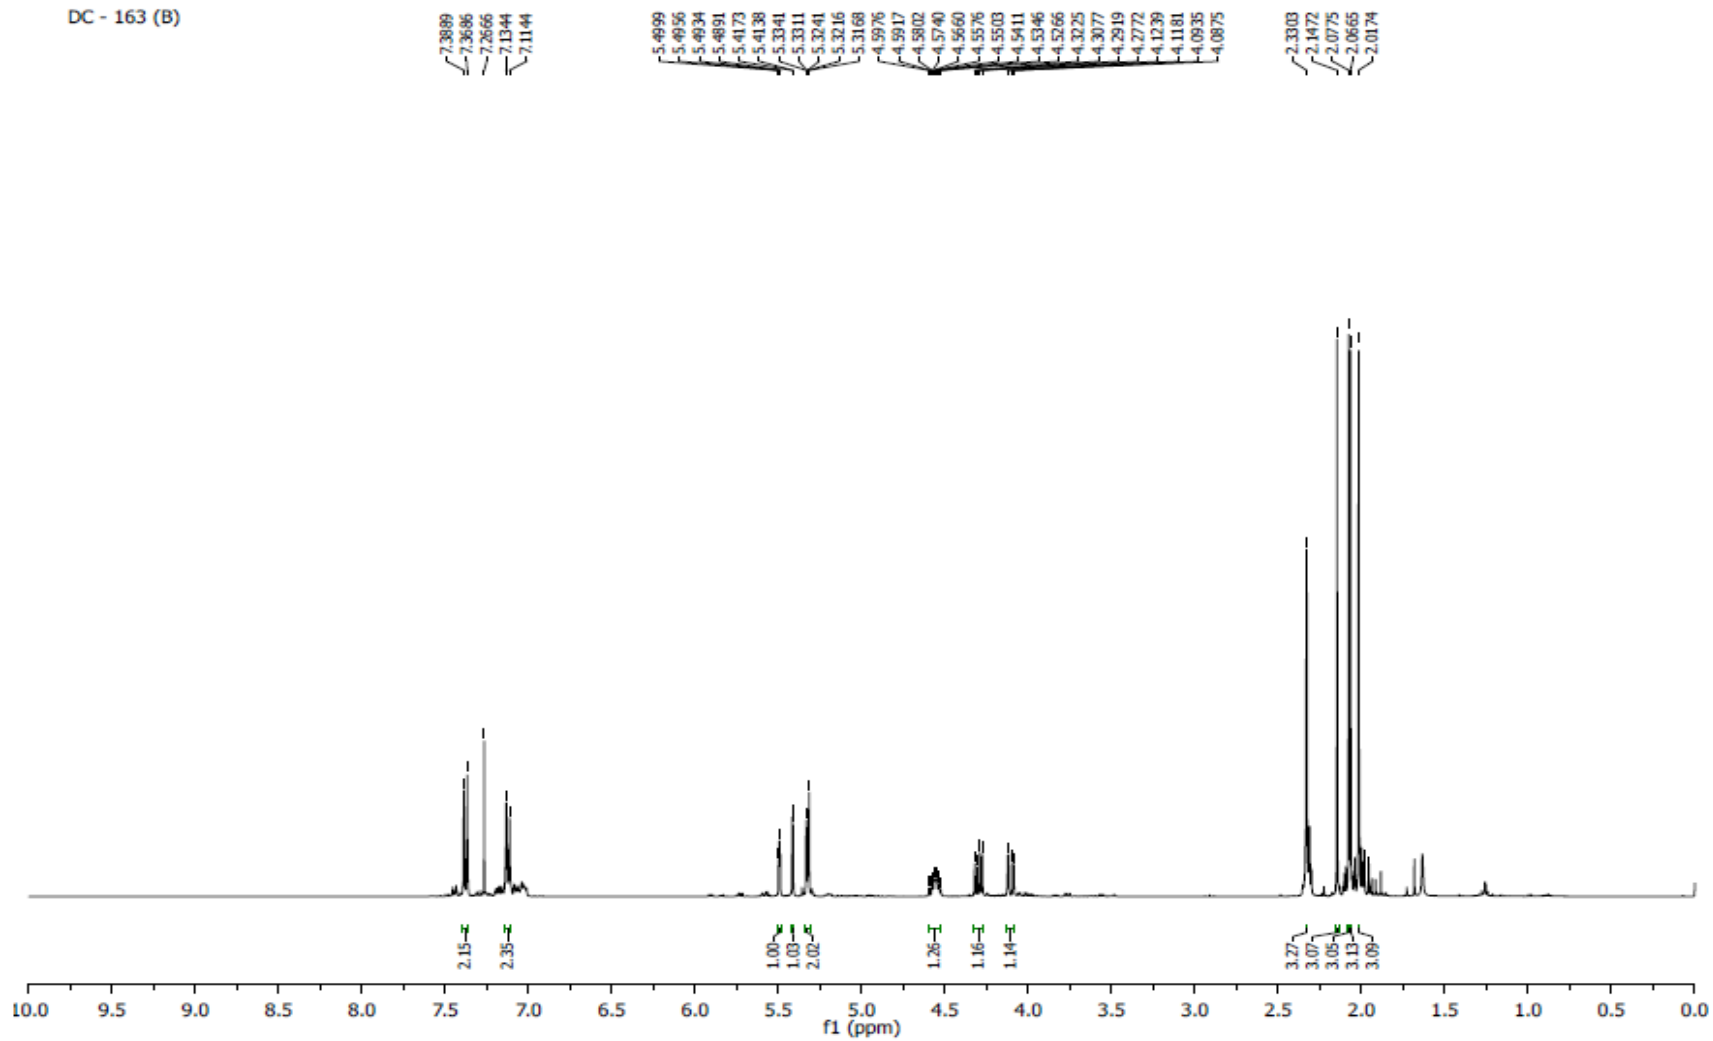

**Fig. 29**  $^1\text{H-NMR}$  spectra (400 MHz,  $\text{CDCl}_3$ ) of *p*-Tolyl 2,3,4,6-tetra-*O*-acetyl-1-thio- $\alpha$ -D-mannopyranoside (**3b**)

DC - 163 (B)

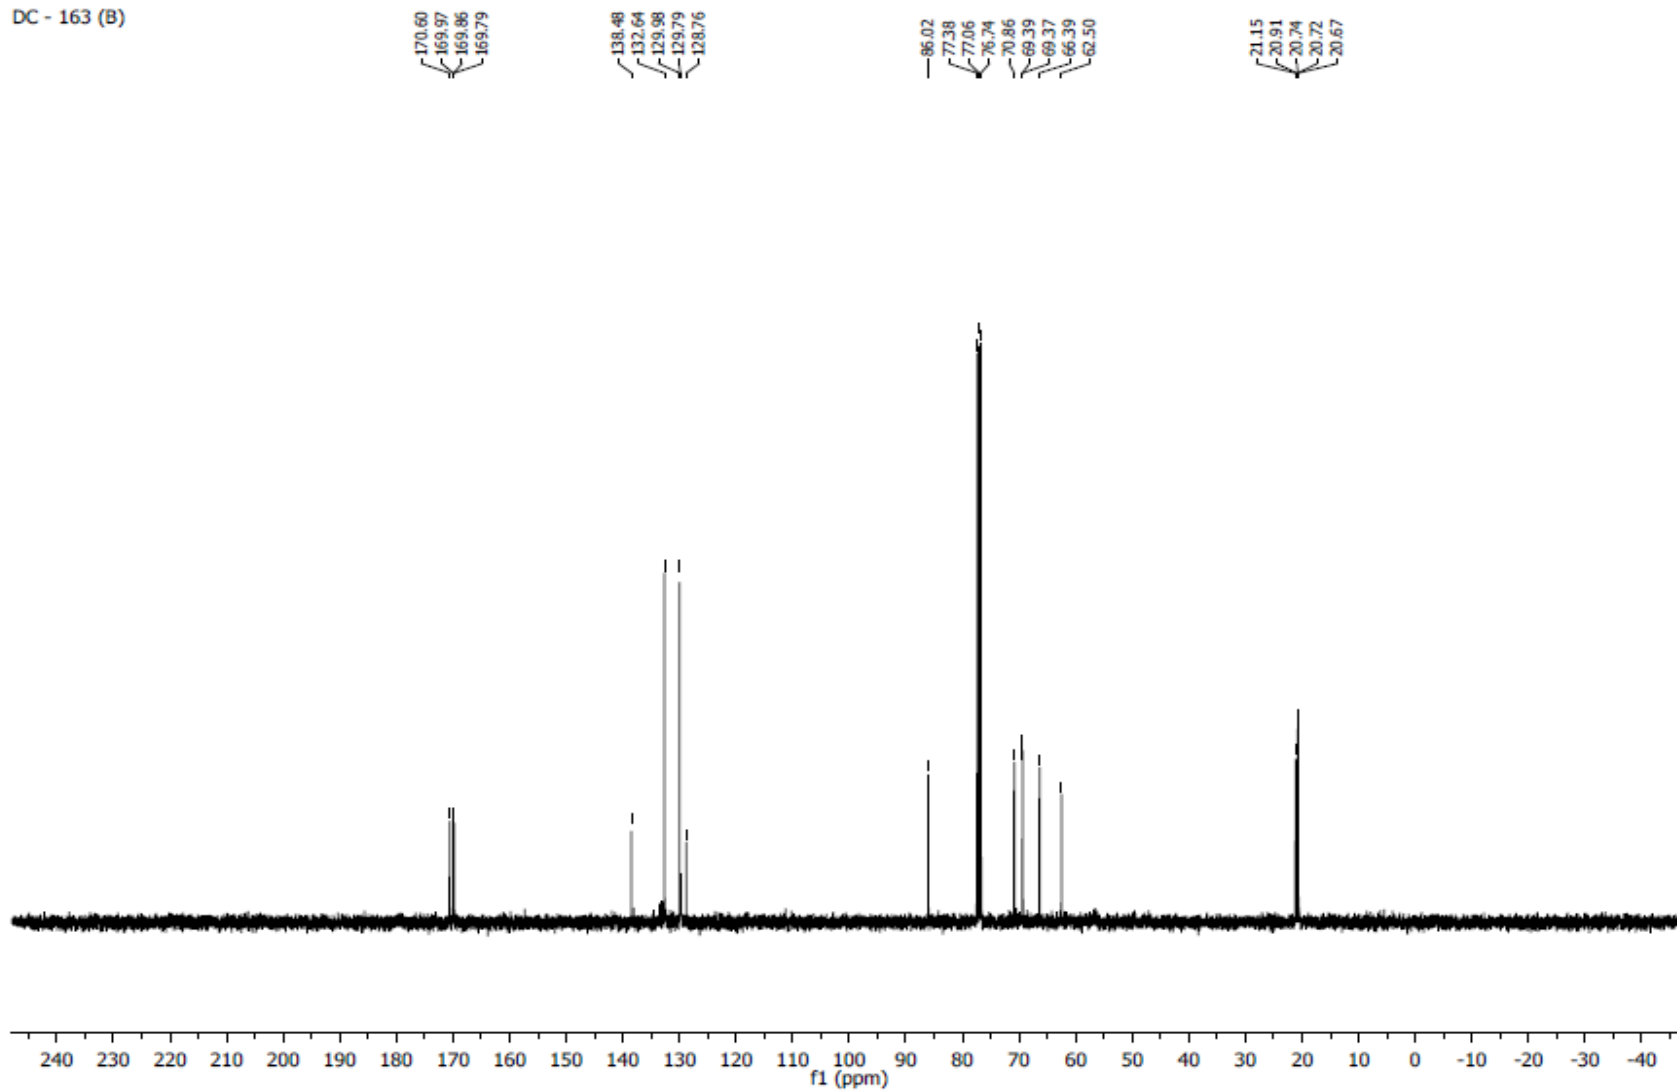

**Fig. 30**  $^{13}\text{C}$ -NMR spectra (100 MHz,  $\text{CDCl}_3$ ) of *p*-Tolyl 2,3,4,6-tetra-*O*-acetyl-1-thio- $\alpha$ -D-mannopyranoside (**3b**)



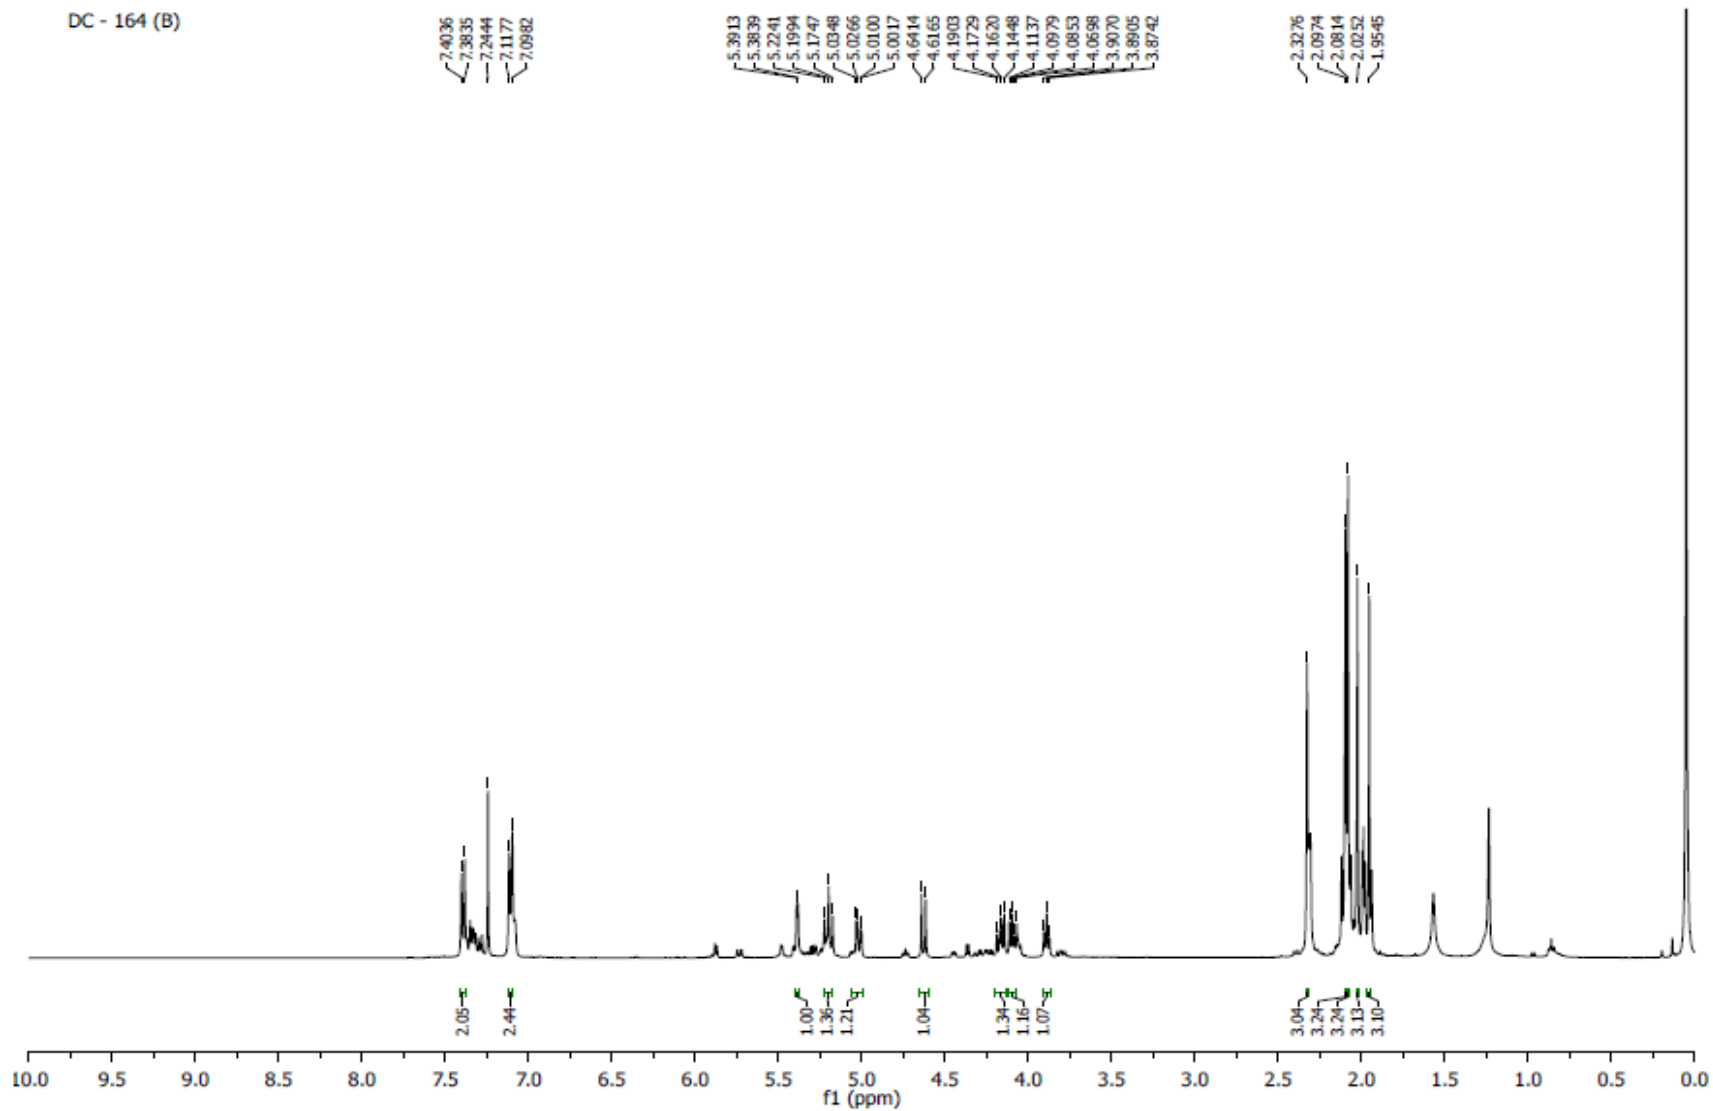

**Fig. 31**  $^1\text{H-NMR}$  spectra (400 MHz,  $\text{CDCl}_3$ ) of *p*-Tolyl 2,3,4,6-tetra-*O*-acetyl-1-thio- $\beta$ -D-galactopyranoside (**3c**)

DC - 164 B

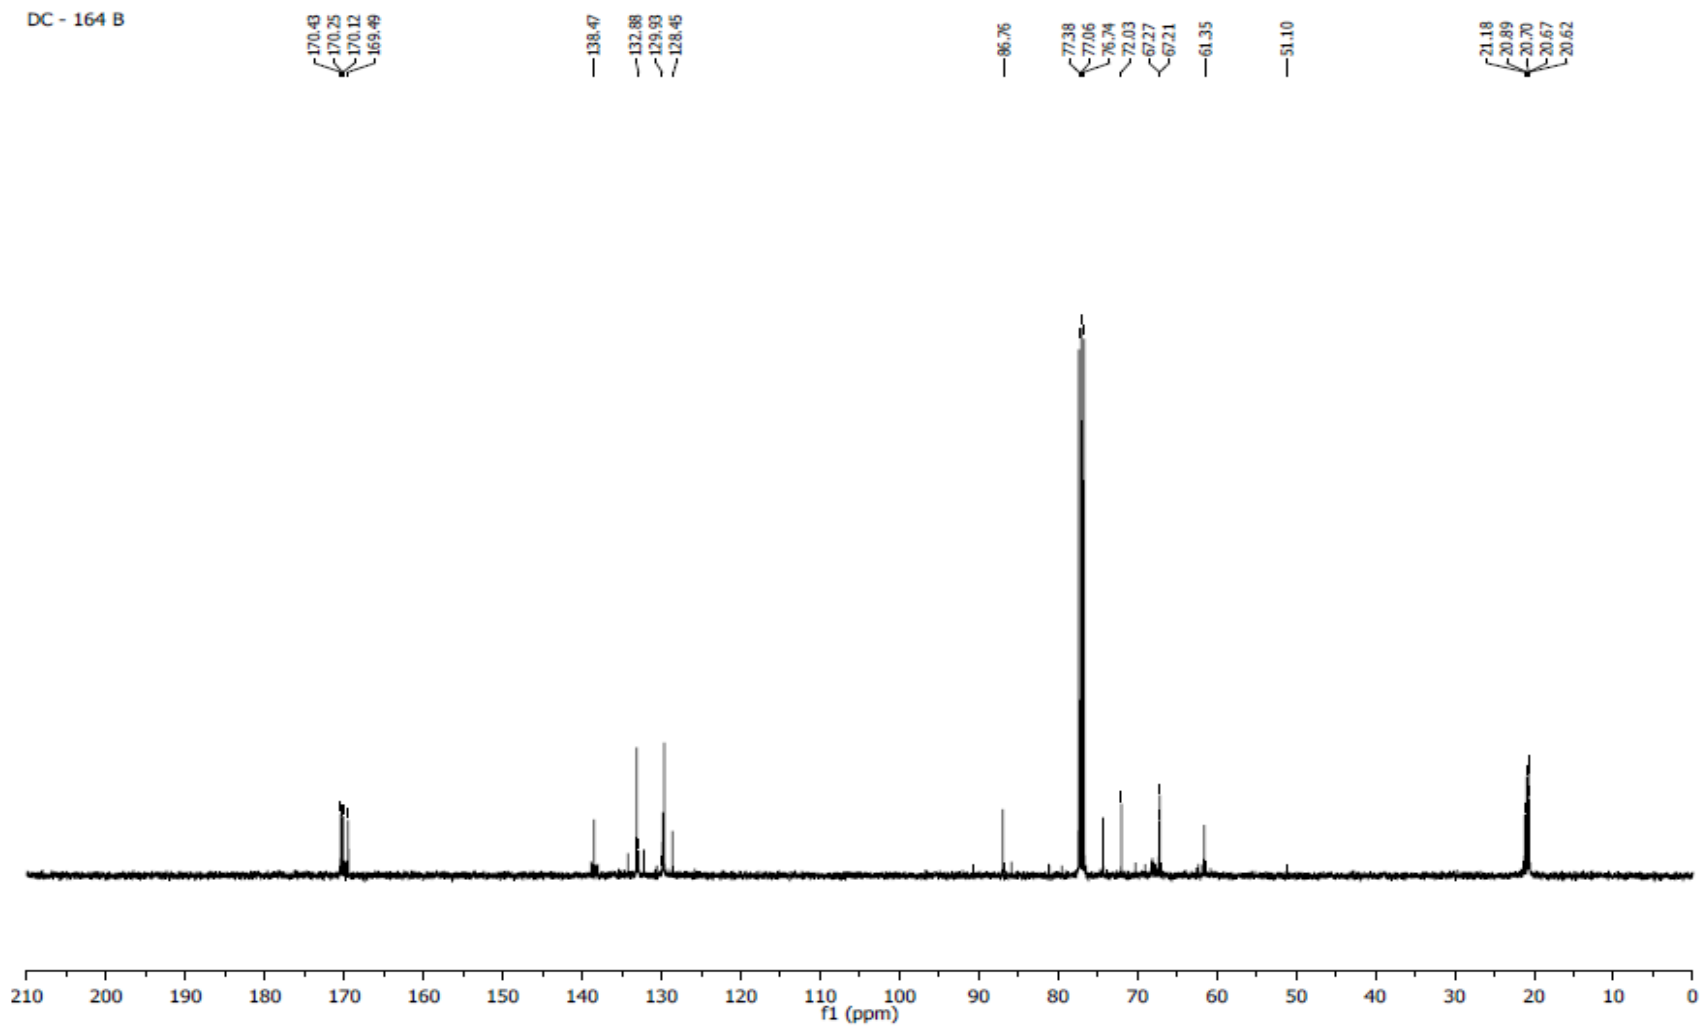

**Fig. 32** <sup>13</sup>C-NMR spectra (100 MHz, CDCl<sub>3</sub>) of *p*-Tolyl 2,3,4,6-tetra-*O*-acetyl-1-thio-β-D-galactopyranoside (**3c**)

DC - 151

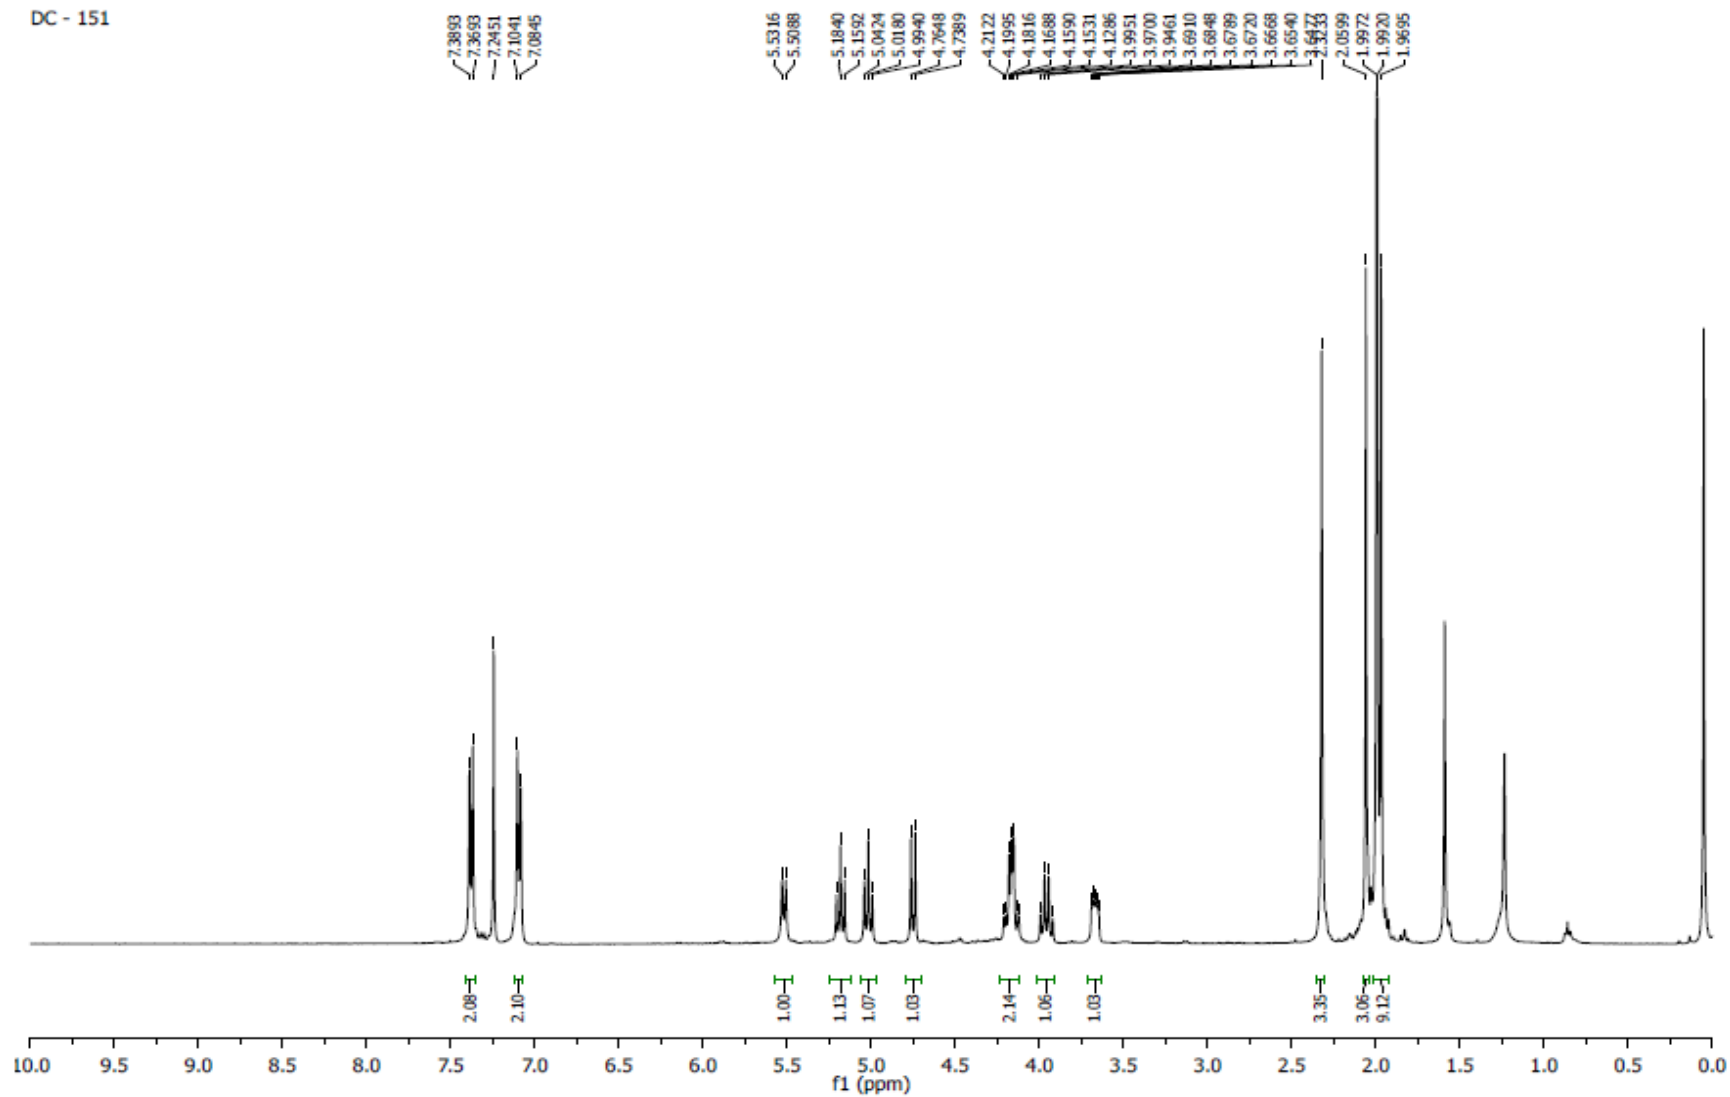

**Fig. 33**  $^1\text{H-NMR}$  spectra (400 MHz,  $\text{CDCl}_3$ ) of *p*-Tolyl 2-acetamido-3,4,6-tri-*O*-acetyl-2-deoxy-1-thio- $\beta$ -D-glucopyranoside (**3d**)



DC - 151

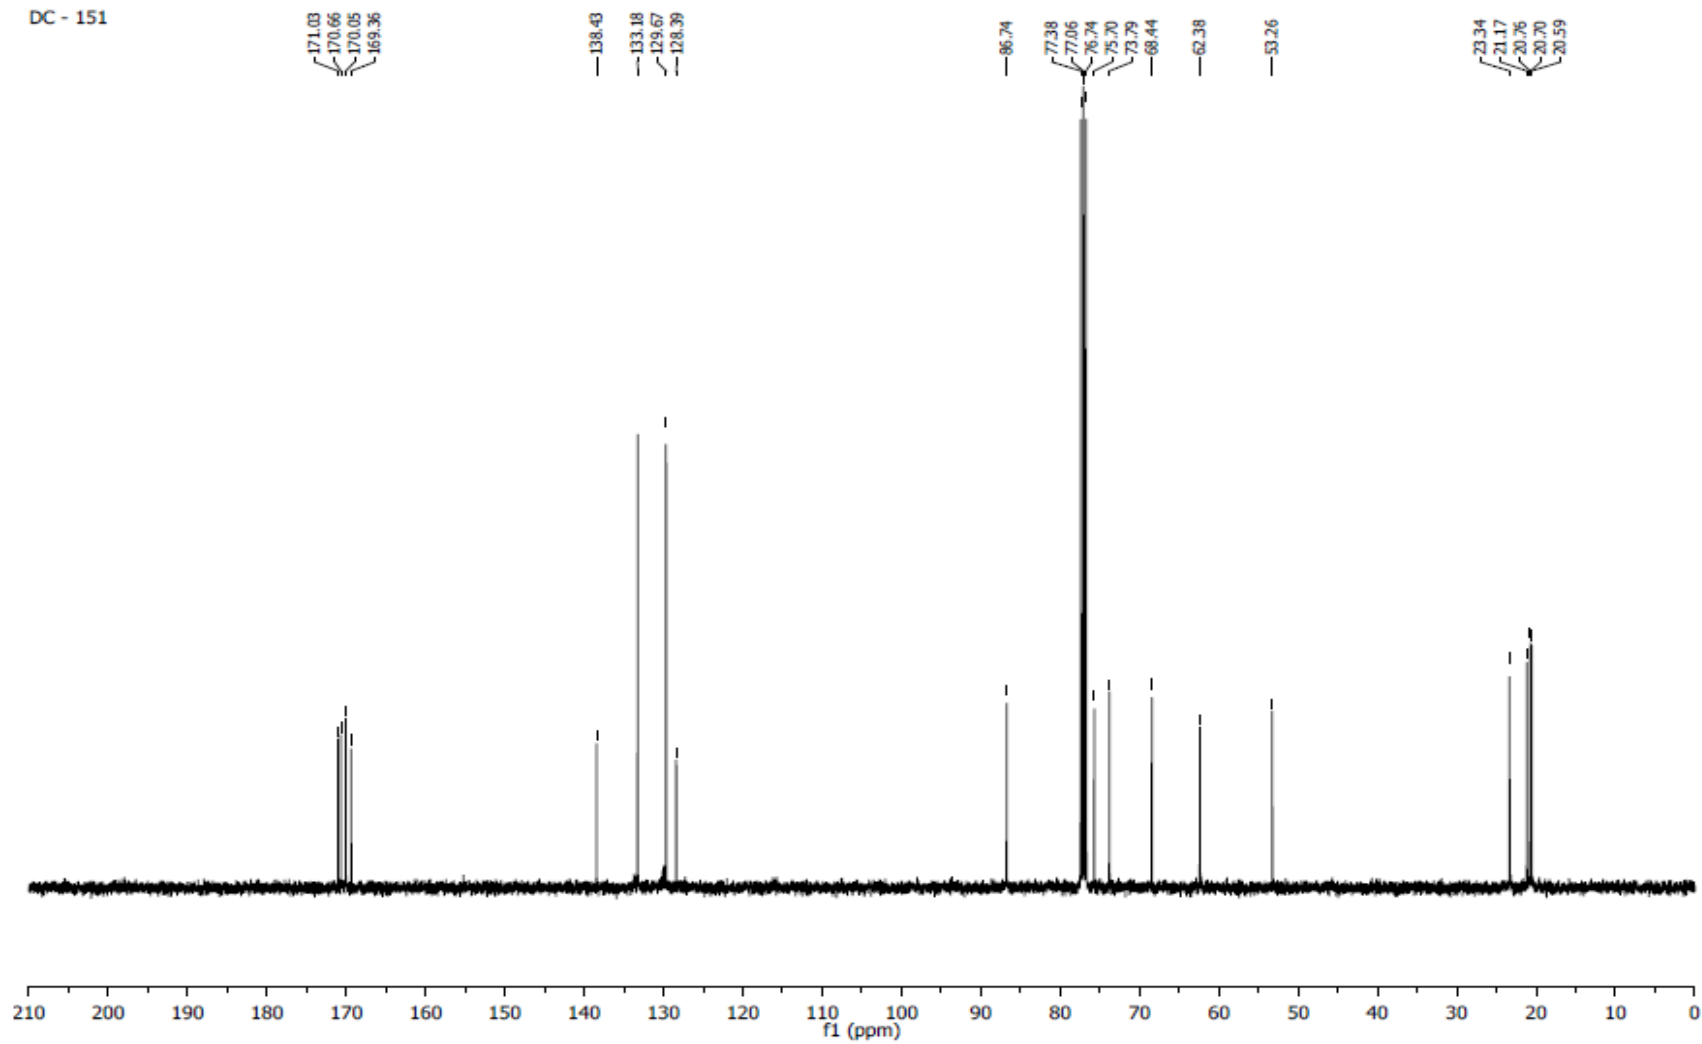

**Fig. 34** <sup>13</sup>C-NMR spectra (100 MHz, CDCl<sub>3</sub>) of *p*-Tolyl 2-acetamido-3,4,6-tri-*O*-acetyl-2-deoxy-1-thio-β-D-glucopyranoside (**3d**)

DC - 182

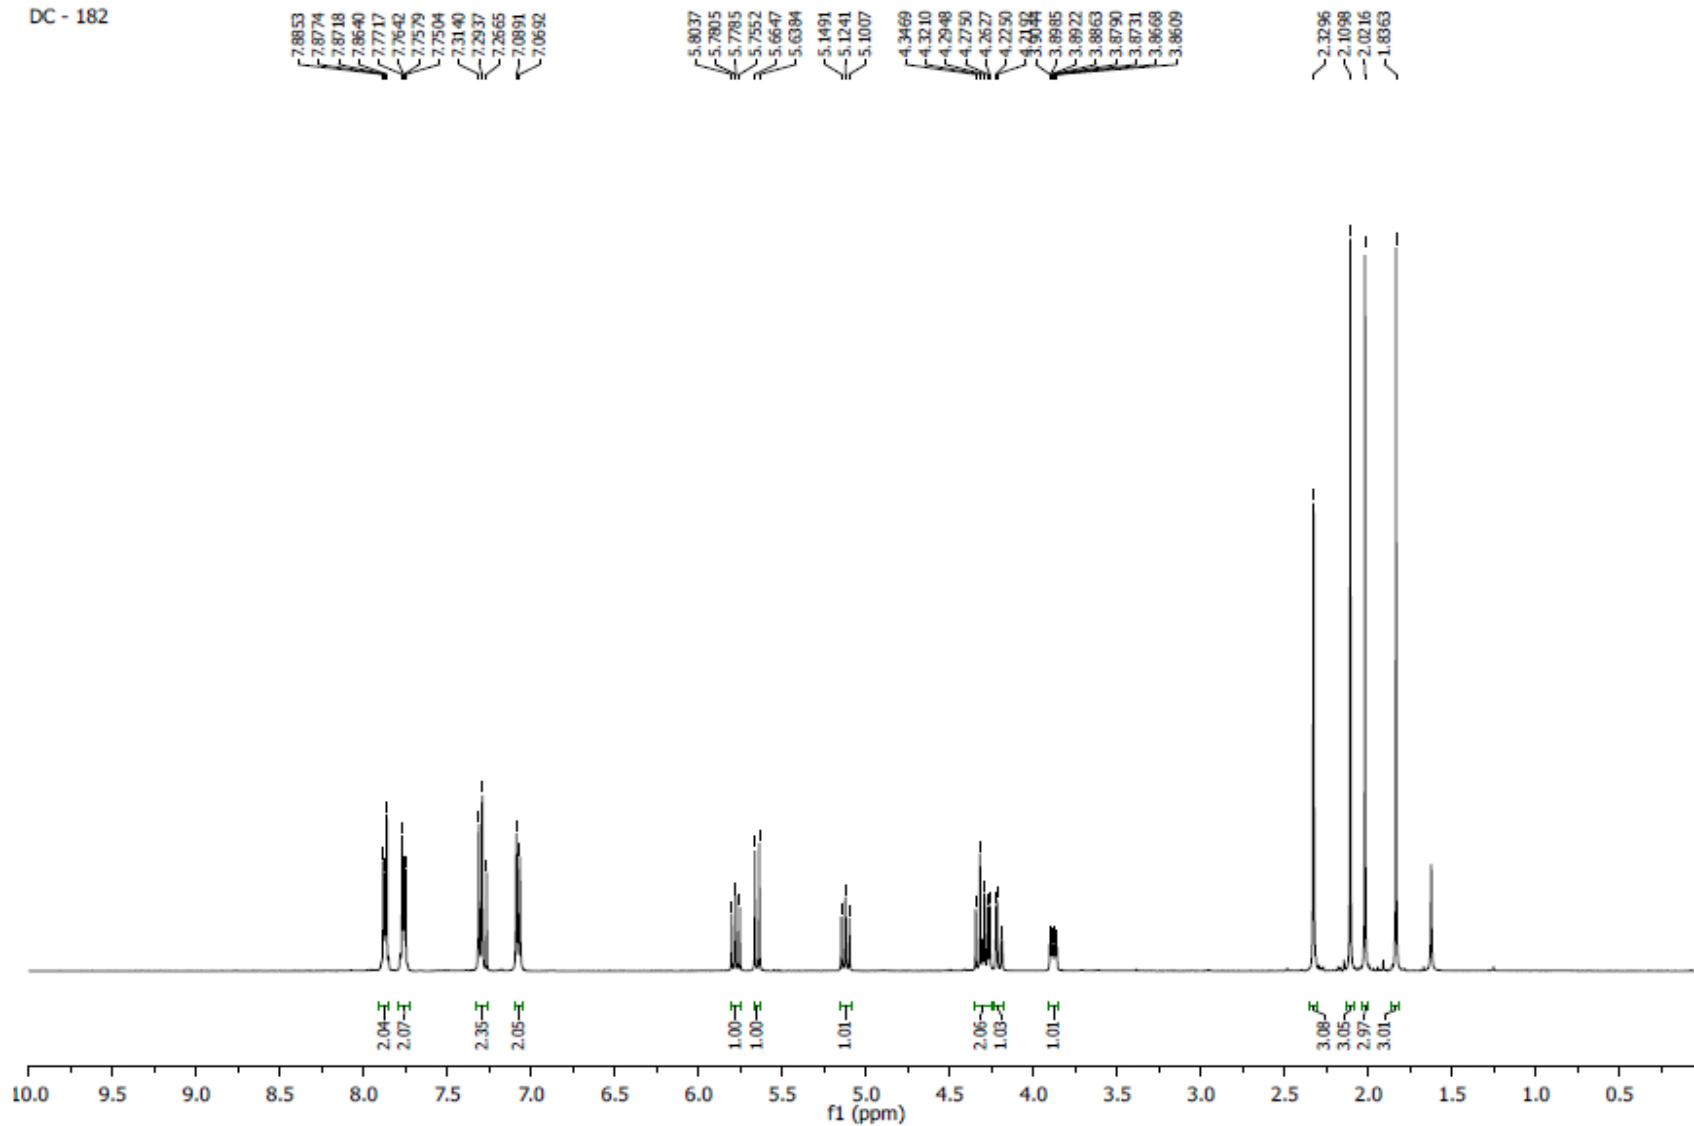

**Fig. 35** <sup>1</sup>H-NMR spectra (400 MHz, CDCl<sub>3</sub>) of *p*-Tolyl 3,4,6-tri-*O*-acetyl-2-phthalimido-2-deoxy-1-thio-β-D-glucopyranoside (**3e**)

DC - 182

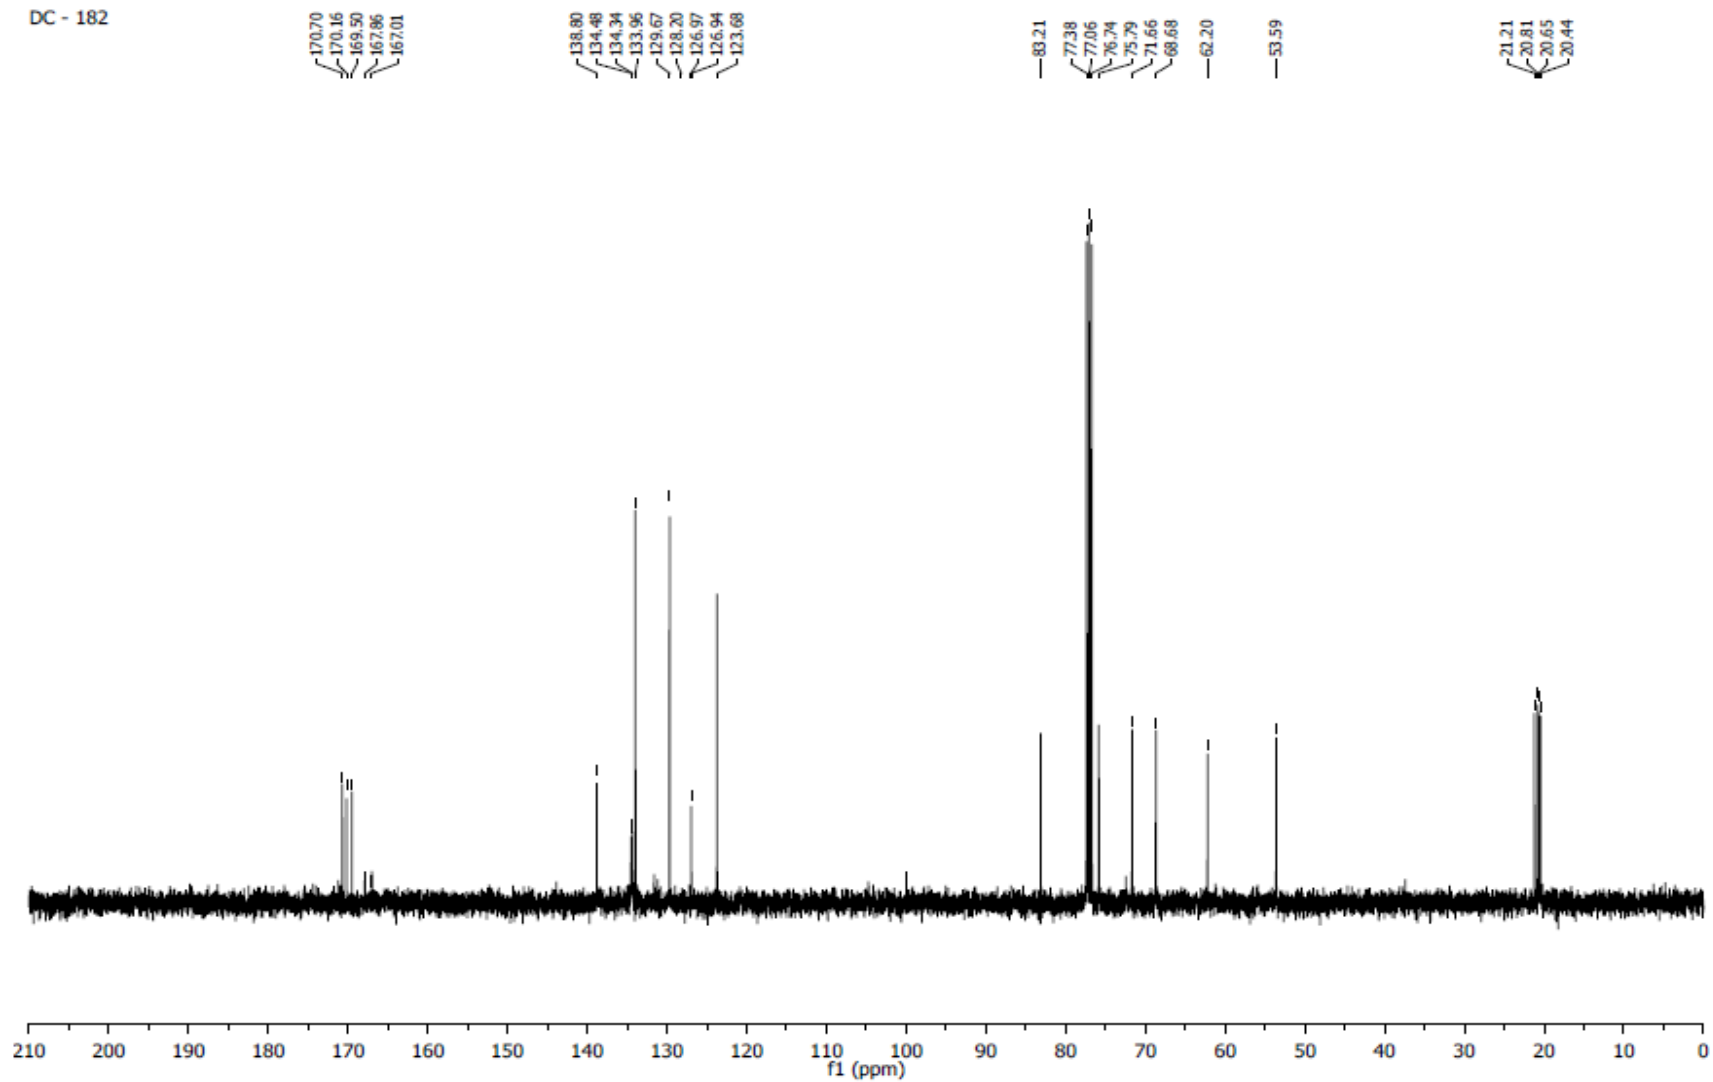

**Fig. 36**  $^{13}\text{C}$ -NMR spectra (100 MHz,  $\text{CDCl}_3$ ) of *p*-Tolyl 3,4,6-tri-*O*-acetyl-2-phthalimido-2-deoxy-1-thio- $\beta$ -D-glucopyranoside (**3e**)

DC - 138

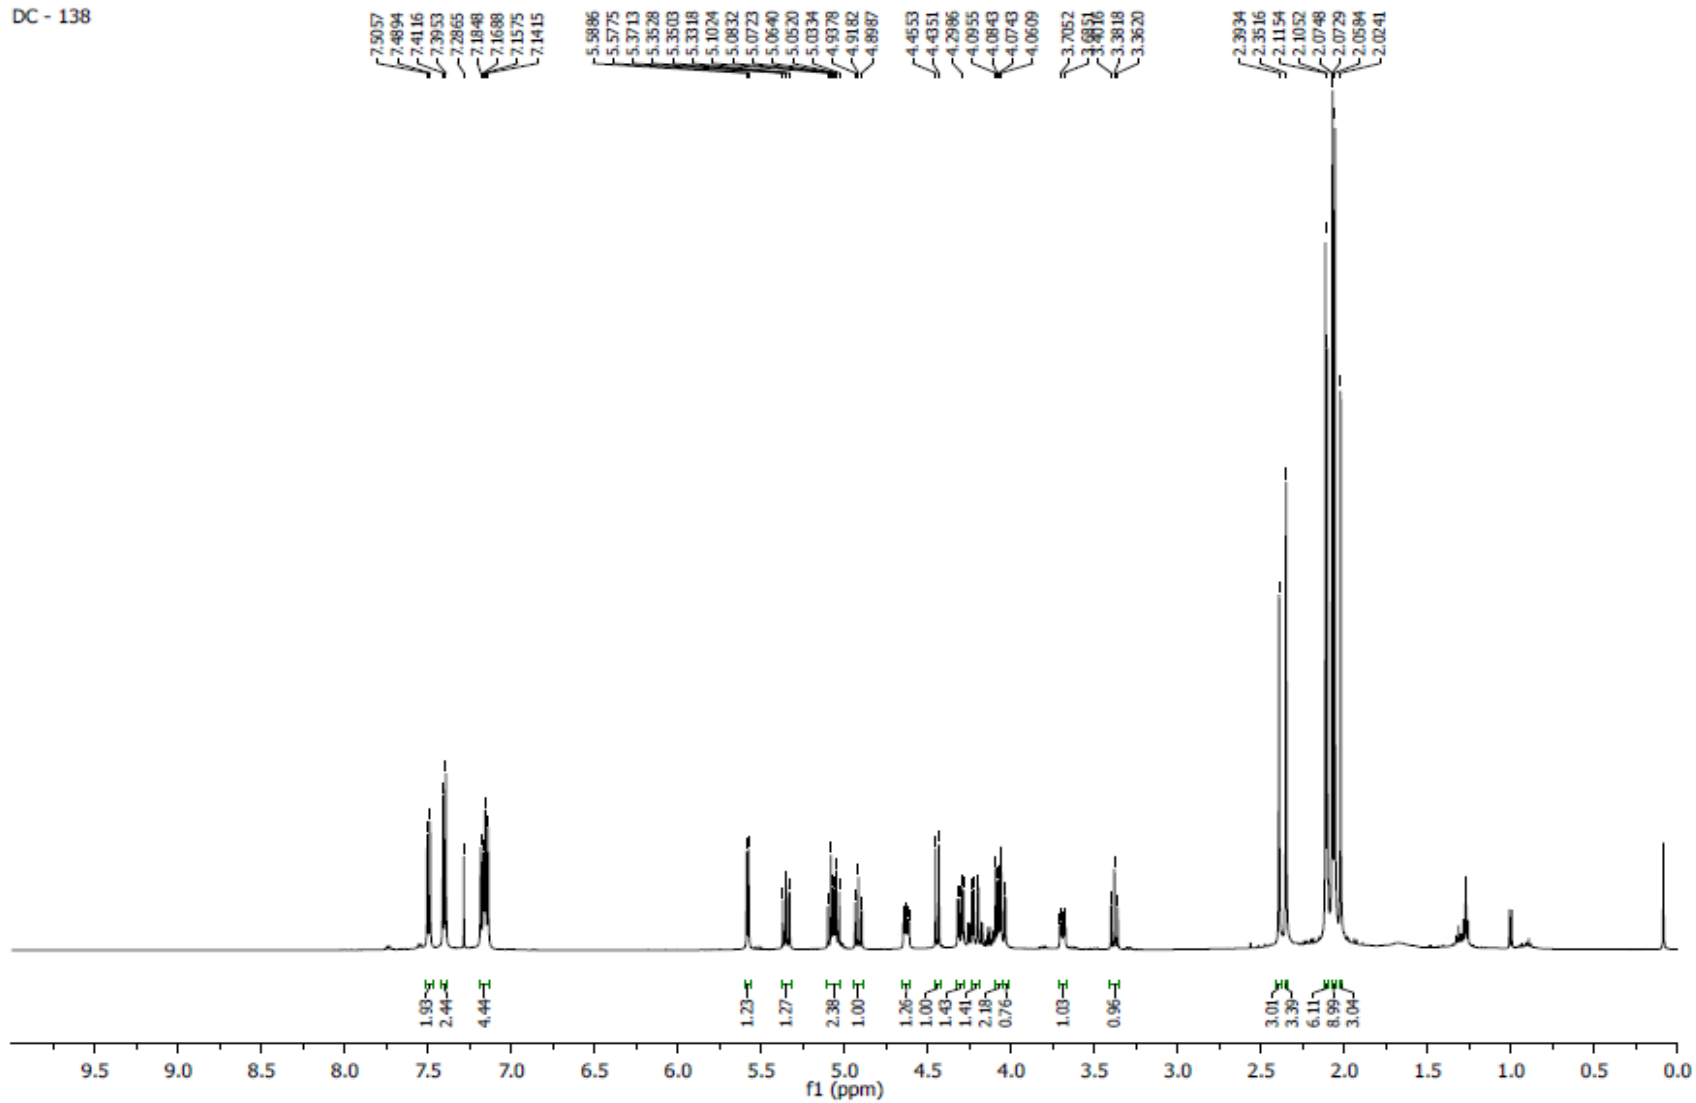

Fig. 37  $^1\text{H-NMR}$  spectra (500 MHz,  $\text{CDCl}_3$ ) of *p*-Tolyl 3,4,6-Tri-*O*-acetyl-2-azido-2-deoxy-1-thio-*D*-glucopyranoside (**3f**)

DC - 138

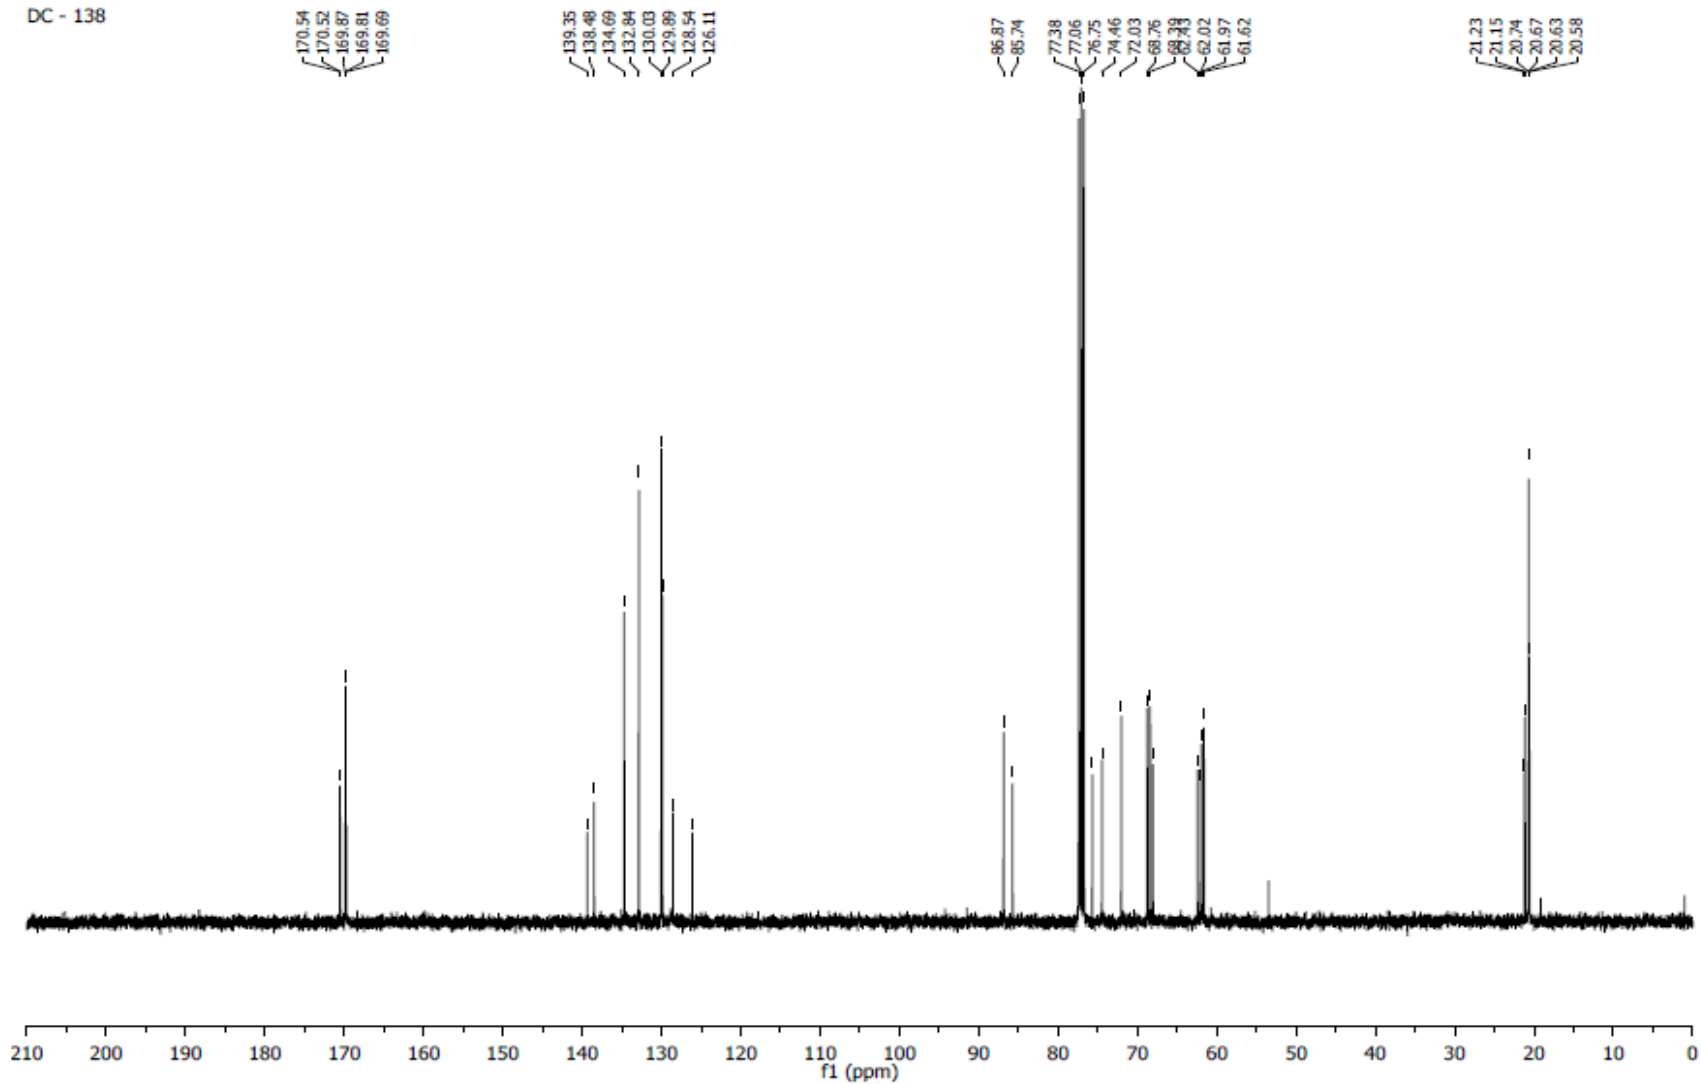

**Fig. 38**  $^{13}\text{C}$ -NMR spectra (100 MHz,  $\text{CDCl}_3$ ) of *p*-Tolyl 3,4,6-Tri-*O*-acetyl-2-azido-2-deoxy-1-thio-D-glucopyranoside (**3f**)
